# Supplementary material
Source: Research Square preprint supplement (doi:10.21203/rs.3.rs-9301745/v1)

## Supplementary Data 1

The muscle compartment data of a representative subject are provided, including T2-weighted images, diffusion-weighted images, and fiber tracts from tractography. It is recommended to use DSI Studio for visualization, and the Windows CPU version 2025 (Copyright (c) 2008-2024 Fang-Cheng Yeh. All rights reserved.) is taken as an example.

1. Download DSI Studio via the following link.

<https://dsi-studio.labsolver.org/download.html>

DSI Studio is free for academic users under Attribution-NonCommercial-ShareAlike 4.0 International License (CC BY-NC-SA 4.0).

2. Open the software. Click on "Step T3" and select the "FIB.dti.fib.gz" file provided.

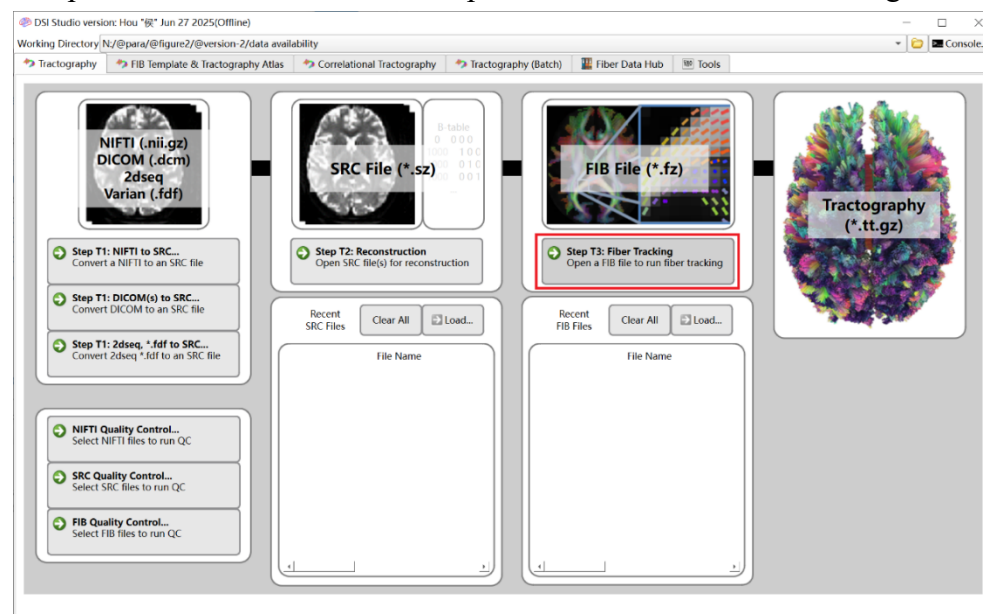

3. Click "File" -> "Load Workspace" and select the "workspace" folder provided.

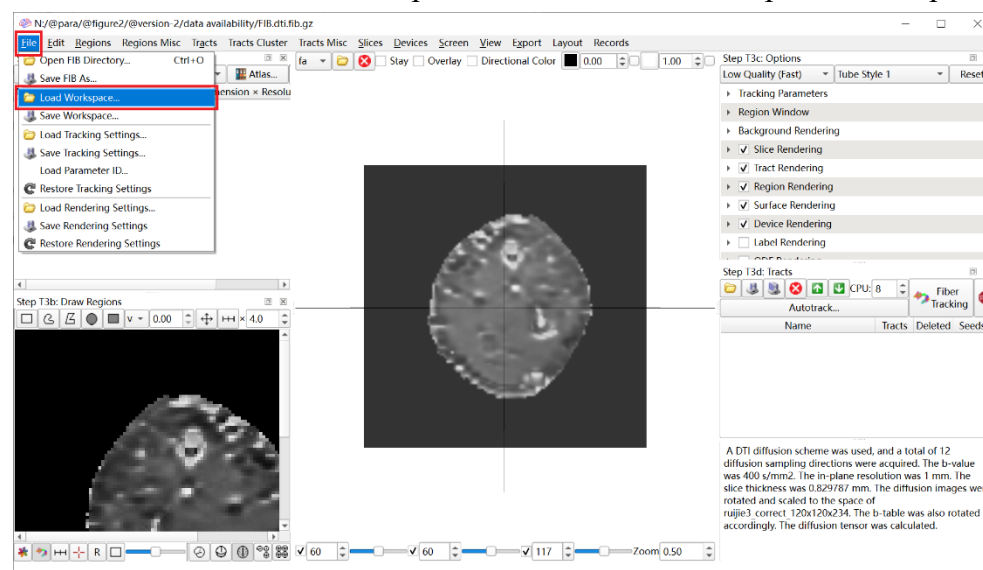

If everything is normal, the following window will be displayed. Congratulations! The visualization has been achieved.

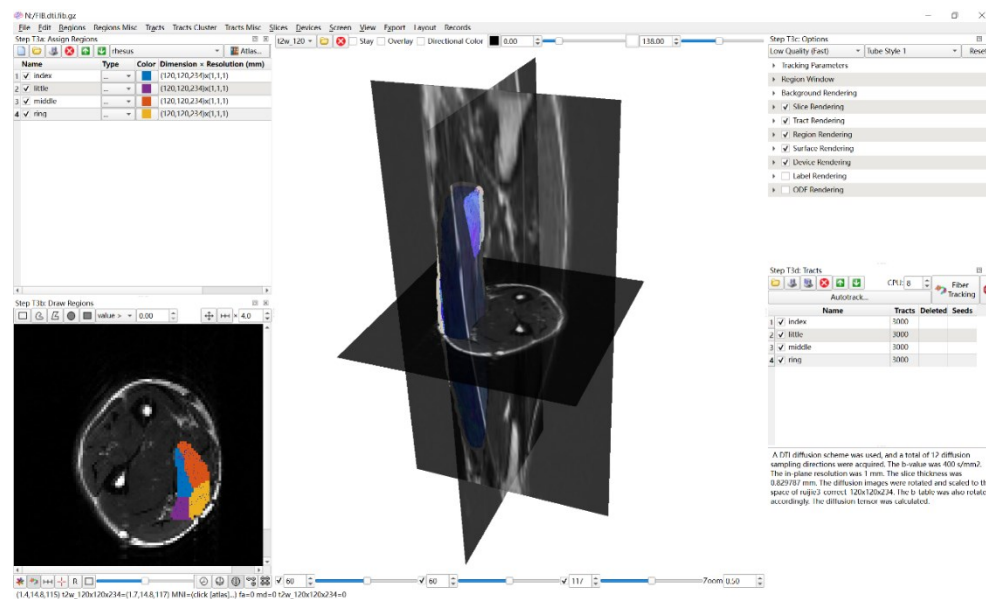

The source files of the masks, T2-weighted images and fiber tracts can be found in the workspace folder.

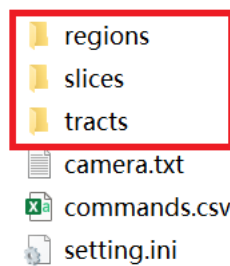

4. The following figure indicates the options for the masks, magnetic resonance images, and fiber tracts. Other details of the software can be found on the DSI Studio website. Further uses beyond visualization are beyond the scope of this study.

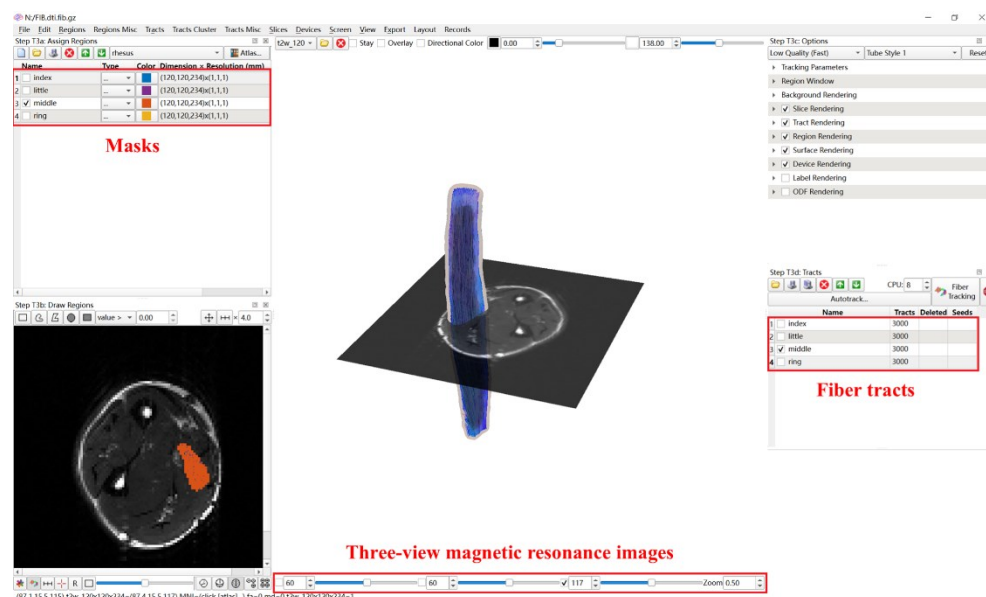

Supplement: Supplementary file 1 [file Readme.pdf › Supplementary-Data-1/Readme.pdf]
