# Supplementary material
Source: Research Square preprint supplement (doi:10.21203/rs.3.rs-9301745/v1)
Supplement: Supplementary file 2 [file 6fd5f612275118b2f615eee9.docx]

Supplementary Materials

**of**

**In Vivo Ultrasound–MRI 3D Mapping of Neuromuscular Compartments Reveals the Neuromechanical Architecture of Finger-Specific Control**

Yang Li1, Yang Yu1,2,3, Yiming Kang1, Zongtian Yin1, Shihan Ma4, Yuxuan Wei1, Qing Li5, Xinjun Sheng1,2,3, Dario Farina4* and Xiangyang Zhu1,2,3*

1 State Key Laboratory of Mechanical System and Vibration, School of Mechanical Engineering, Shanghai Jiao Tong University, Shanghai, China

2Shanghai Key Laboratory of Intelligent Robotics, Shanghai Jiao Tong University, Shanghai, China

3Meta Robotics Institute, Shanghai Jiao Tong University, Shanghai, China

4Department of Bioengineering, Imperial College London, SW7 2AZ London, U.K.

5MR Research Collaborations, Siemens Healthineers Ltd., Shanghai, China

* Correspondence: d.farina@imperial.ac.uk, mexyzhu@sjtu.edu.cn

**List of Supplementary Materials**

**Supplementary Fig. 1,** Magnetic resonance images of a representative subject.

**Supplementary Fig. 2,** Location for ultrasound and electromyogram acquisition.

**Supplementary Fig. 3,** An MRI-compatible hand immobilization device.

**Supplementary Fig. 4,** A customized electromyography experimental platform.

**Supplementary Fig. 5,** Seed point sampling experiment of region growing algorithm for the index compartment.

**Supplementary Fig. 6,** Seed point sampling experiment of region growing algorithm for the middle compartment.

**Supplementary Fig. 7,** Seed point sampling experiment of region growing algorithm for the ring compartment.

**Supplementary Fig. 8,** Seed point sampling experiment of region growing algorithm for the little compartment.

**Supplementary Fig. 9,** Fiber tractography of flexor digitorum superficialis (FDS) muscle compartments.

**Supplementary Fig. 10,** Tractography for the muscle compartments of FDS in ventral view.

**Supplementary Fig. 11,** Muscle activation maps affected by co-contraction.

**Supplementary Fig. 12,** Statistical appropriateness of fiber length and pennation angle.

**Supplementary Fig. 13,** Maximum voluntary contraction (MVC) force and physiological cross-sectional area (PCSA) of fingers.

**Supplementary Fig. 14,** The linear regression results of MVC force and PCSA of fingers.

**Supplementary Fig. 15,** Analysis of variance (ANOVA) of individual-finger force estimation.

**Supplementary Fig. 16,** Force estimation performance for individual fingers, including the index, middle and ring fingers.

**Supplementary Fig. 17,** Force estimation performance for the little finger.

**Supplementary Note 1,** Anatomical overlap reveals performance limits of individual-finger force estimation.

**Supplementary Table 1,** Architectural parameters of FDS muscle and its compartments from 10 healthy individuals.

**Supplementary Movie 1,** Research roadmap.

**Supplementary Movie 2,** Ultrasound experiment for annotation.

**Supplementary Movie 3,** FDS muscle compartments rotating around the proximal-distal axis.

**Supplementary Movie 4,** Electromyography experiment for validation.

**Supplementary Movie 5,** Impact of inter-compartment overlaps on neural interface decoding.

**Supplementary Methods 1,** Region growing.

**Supplementary Methods 2,** Contour mapping.

**Supplementary Methods 3,** Farthest streamline sampling.

**Supplementary Data 1,** Muscle compartment data of a representative subject.


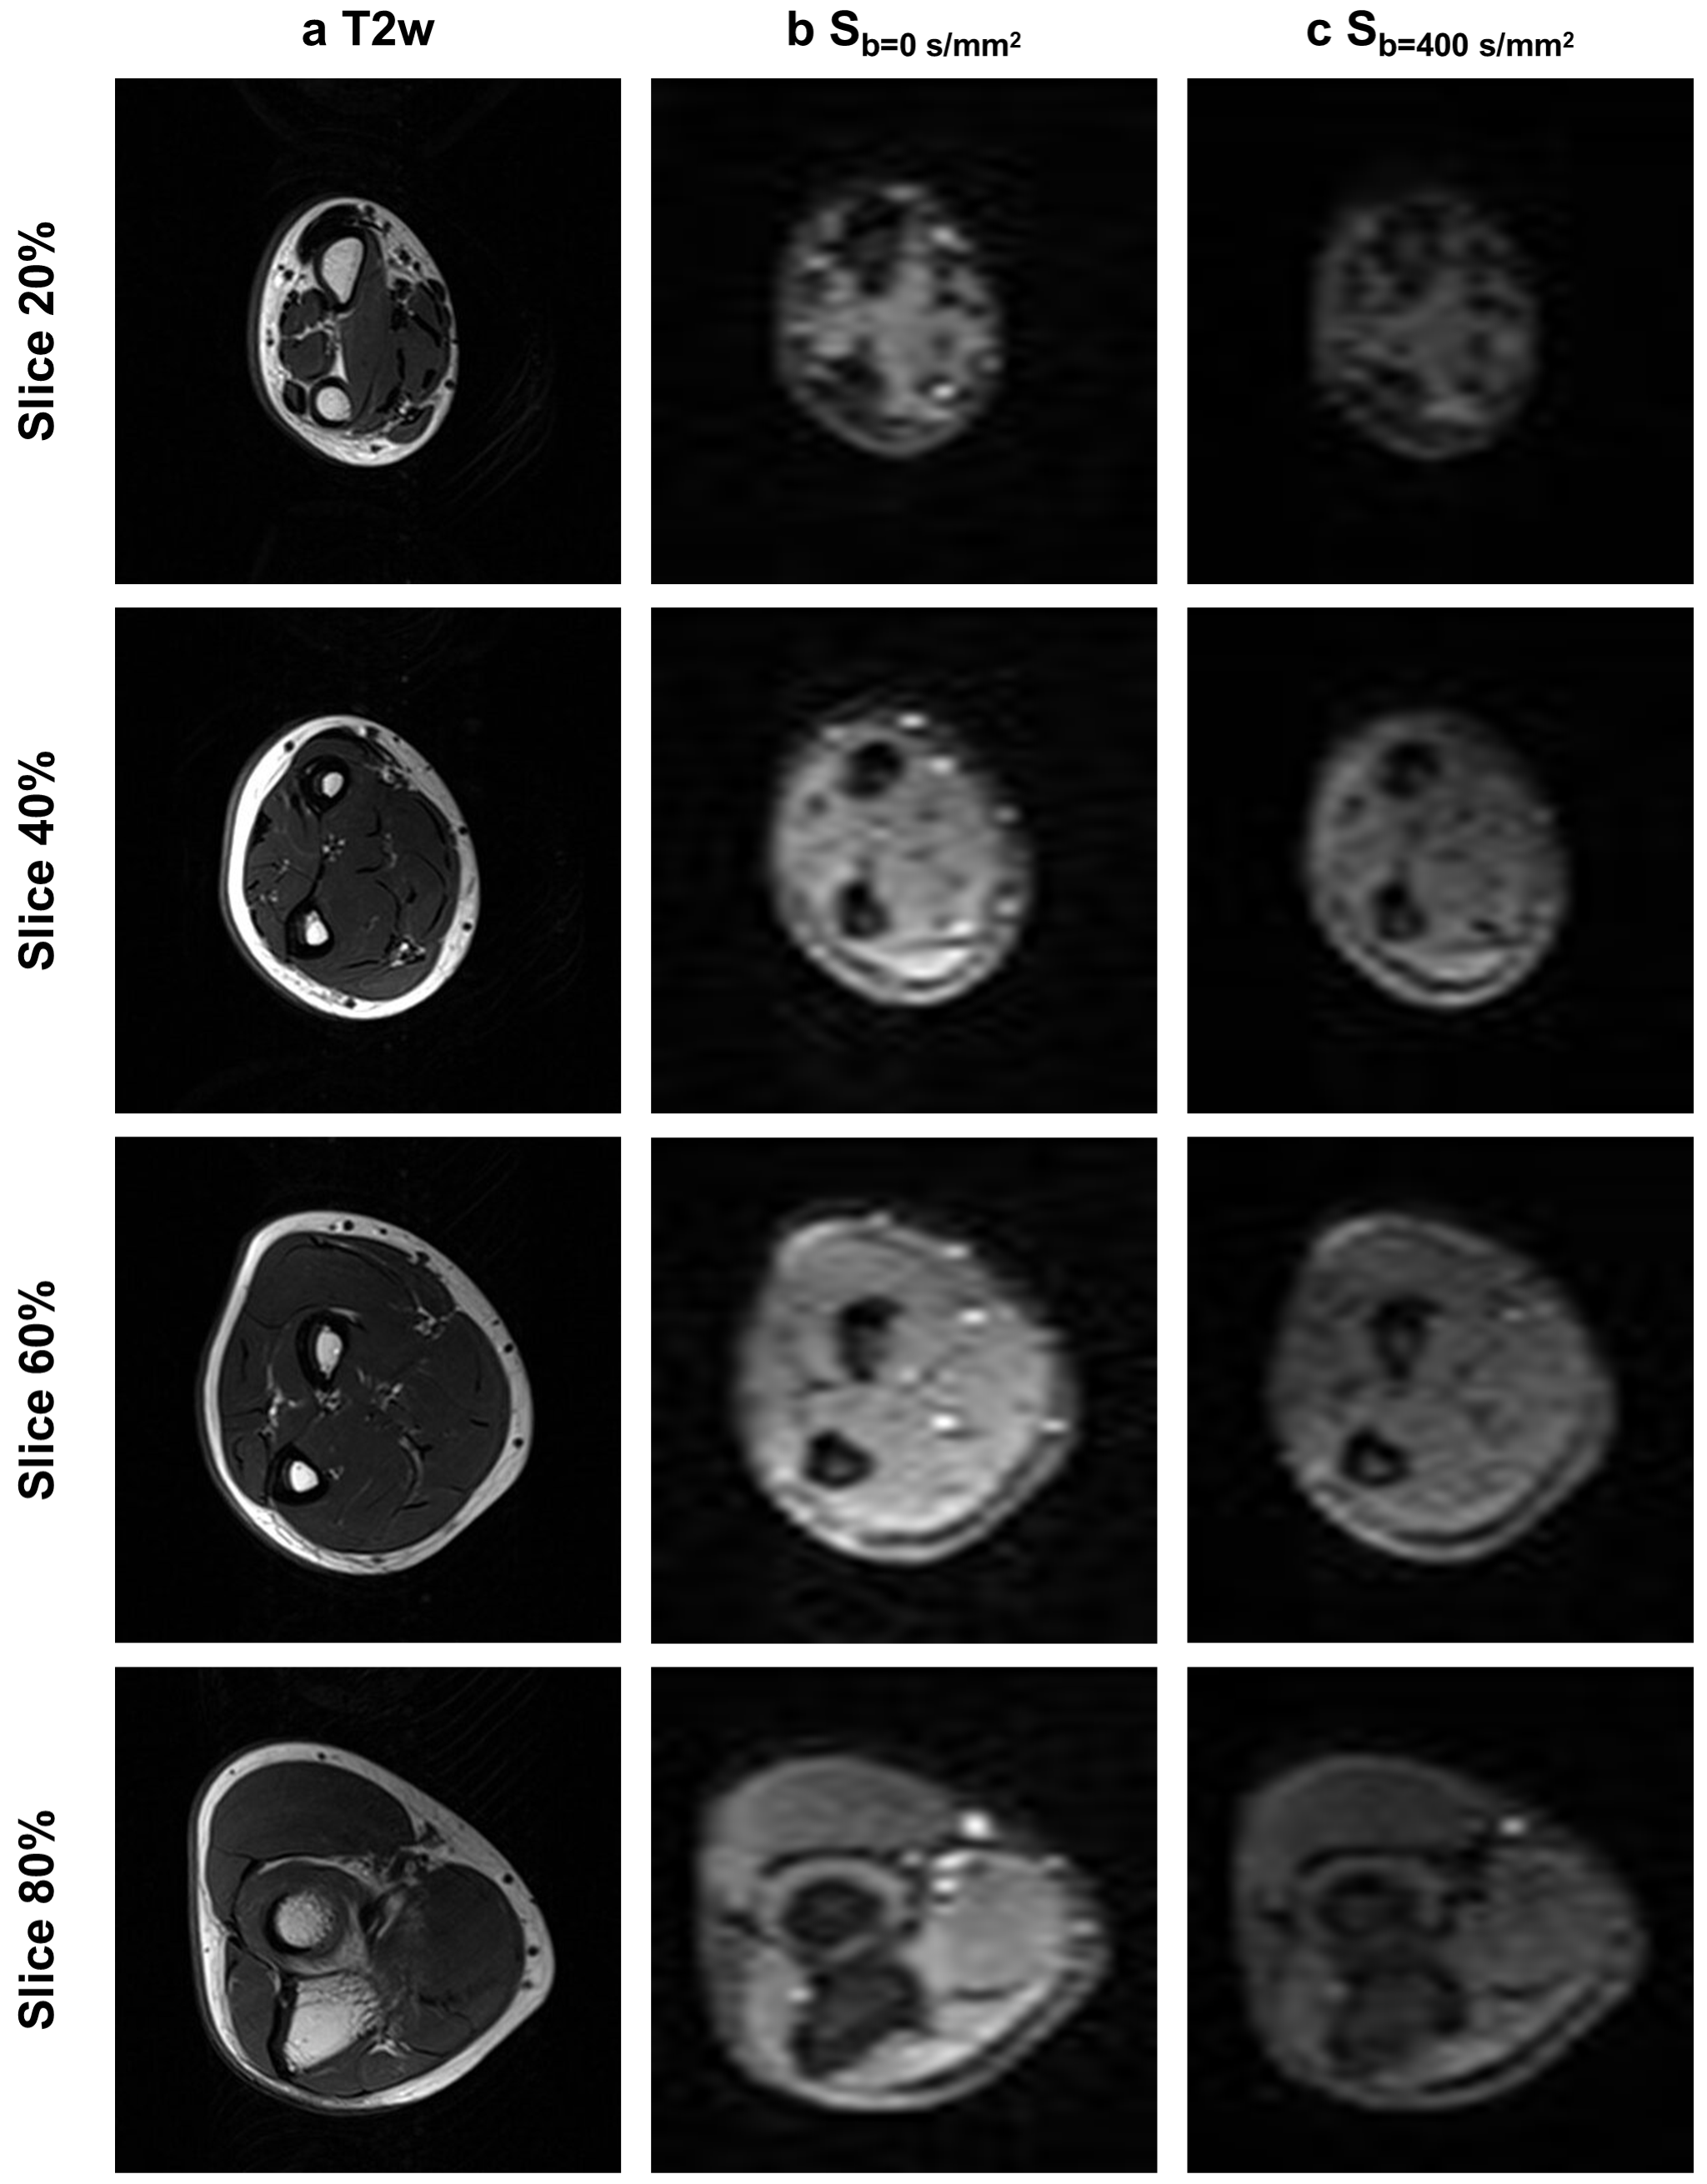


**Supplementary Fig. 1,** **Magnetic resonance images of a representative subject,** including **a,** T2-weighted images, **b,** non-weighted images (b=0 s/mm2), and **c,** diffusion-weighted images (b=400 s/mm2). Slices were sampled at 20% intervals along the axis of forearm.

**
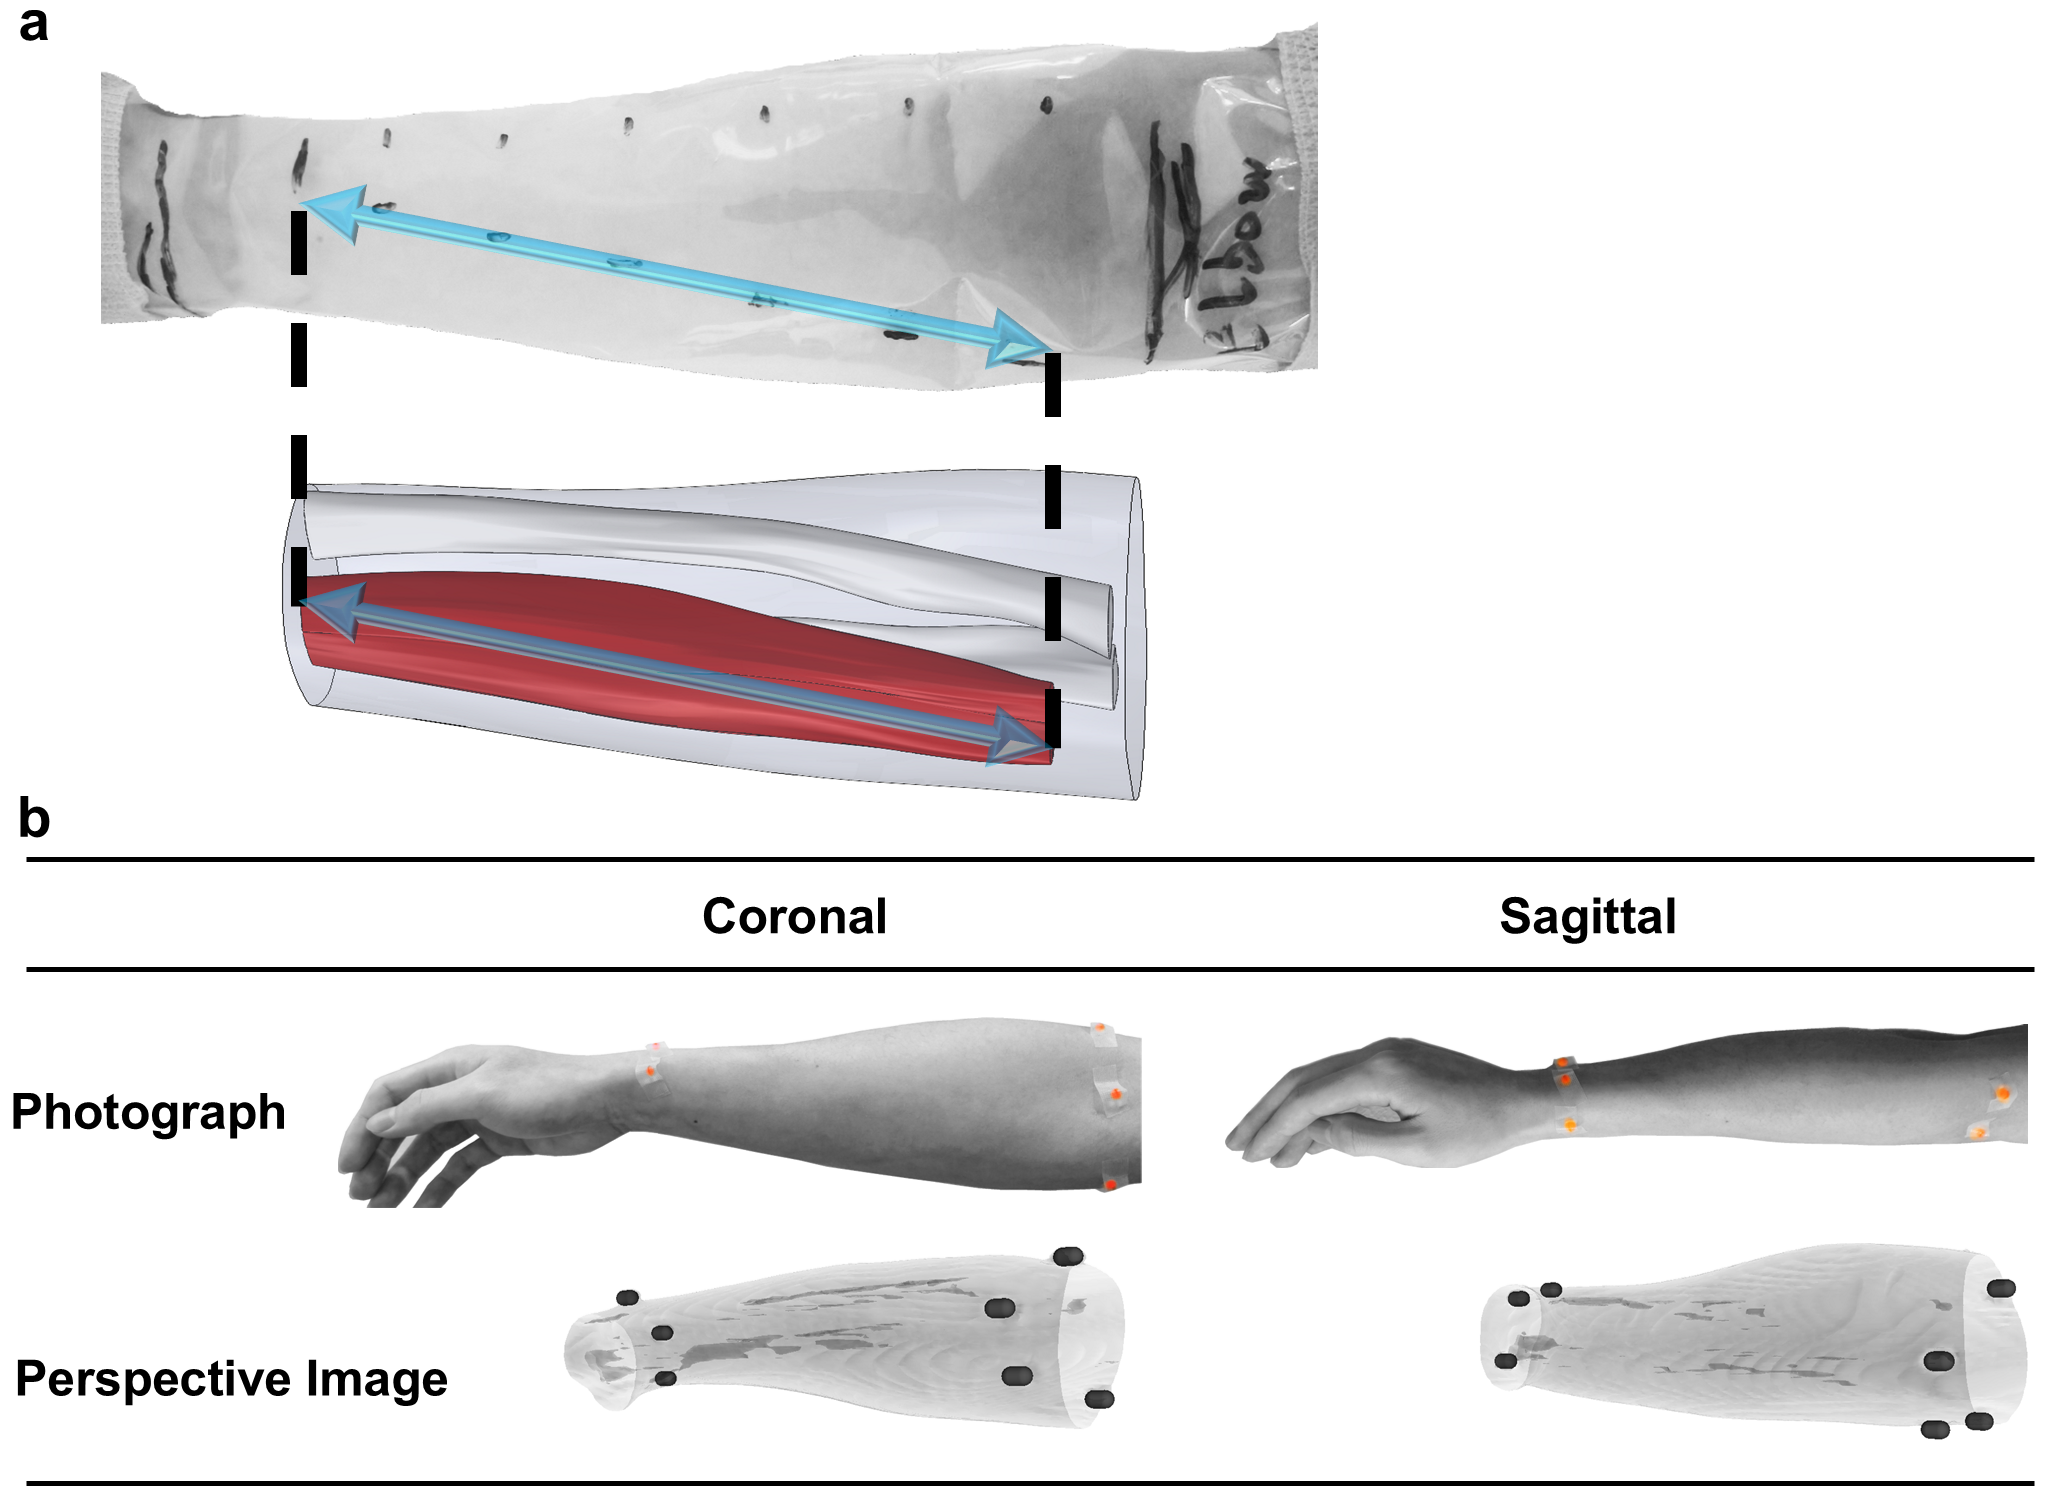
Supplementary Fig. 2, Location for ultrasound and electromyogram acquisition. a,** Masks of flexor digitorum superficialis (FDS) and other structure, including forearm, ulna, and radius. **b,** Relative distances from anatomical landmarks of wrist and elbow were used to determine the location for ultrasound and electromyogram acquisition. The landmarks included the ulnar styloid process, wrist joint, olecranon, and cubital fossa. These landmarks were identifiable both on physical subjects and in MRI images used for the masks. The acquisition location was specified based on the following considerations. Currently, there is a lack of methodological standardization in the fields of ultrasound and electromyography. Most studies do not clearly specify the collection location, making it difficult to compare the data.


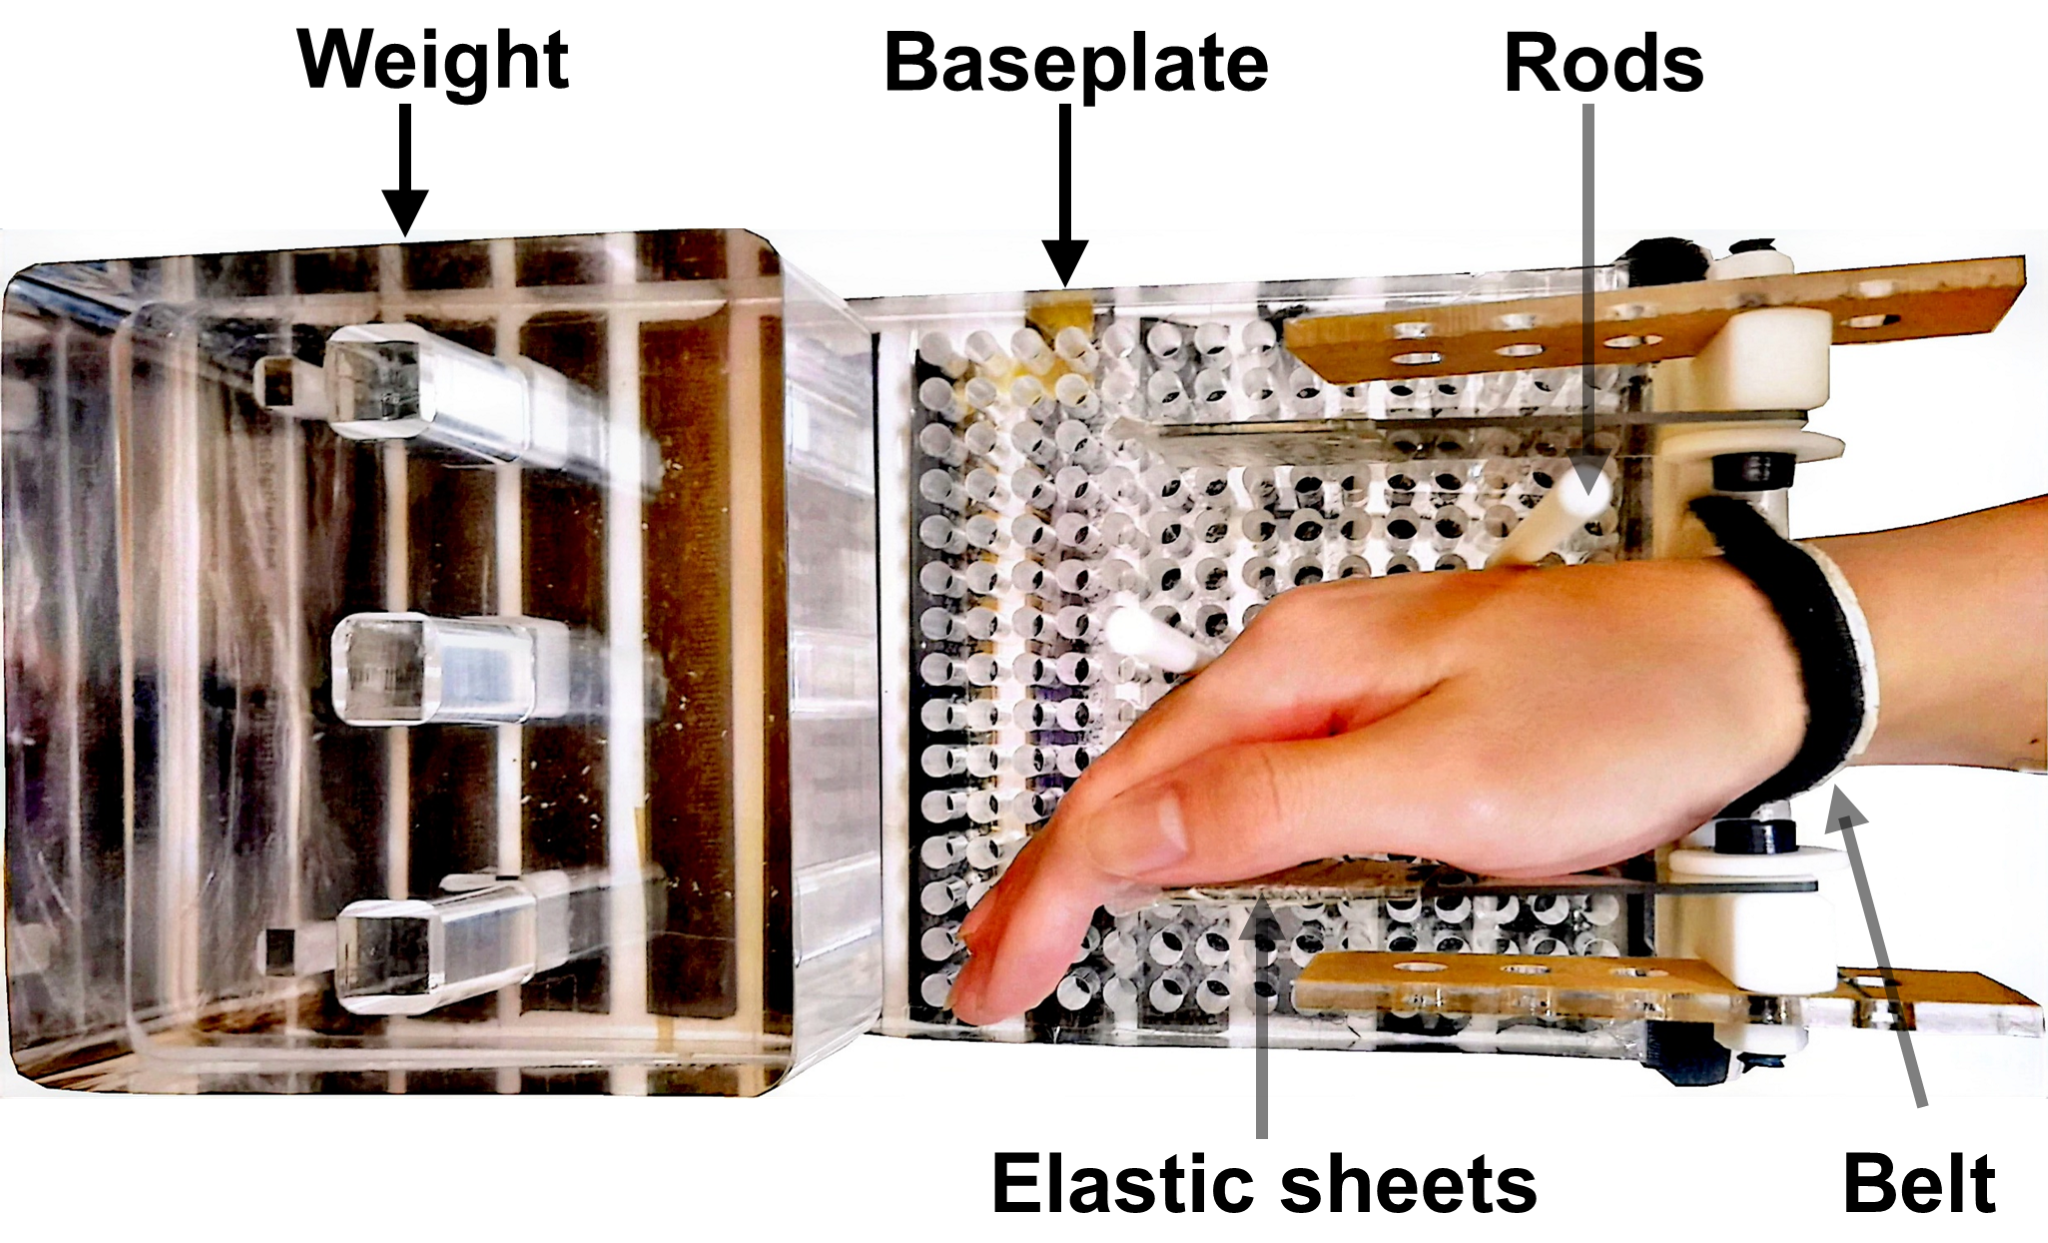


**Supplementary Fig. 3,** **An MRI-compatible hand immobilization device,** designed to maintain the forearm in a neutral position. To minimize involuntary motion during scanning, the baseplate incorporated an array of holes for inserting plastic rods.


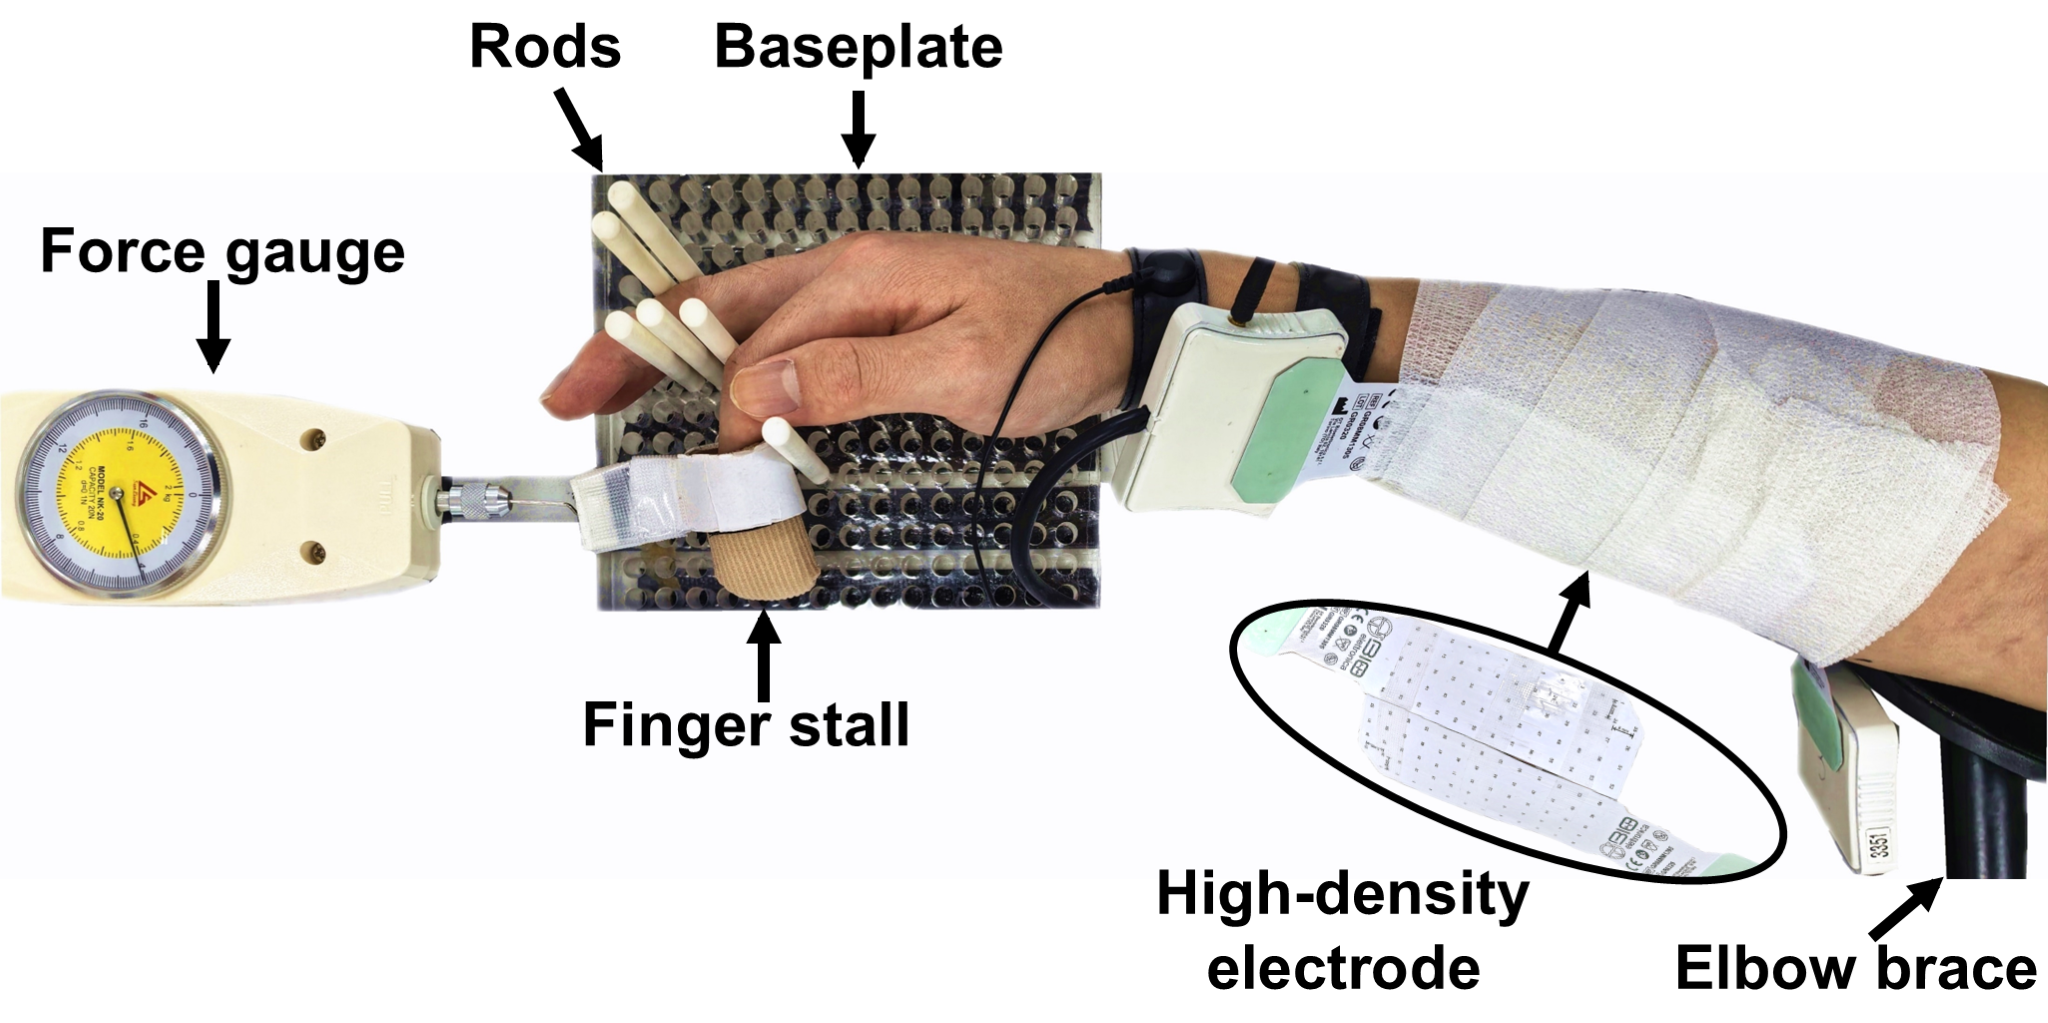


**Supplementary Fig. 4, A customized electromyography experimental platform,** including a hand device and an elbow brace. Both the hand and the elbow were supported. Only the target finger performed isometric contractions in a flexed state, while high-density electromyogram was collected from flexor digitorum superficialis (FDS) muscle in the forearm. The force gauge can be used to measure the strength of each finger, which can be represented by maximum voluntary contraction (MVC) force.


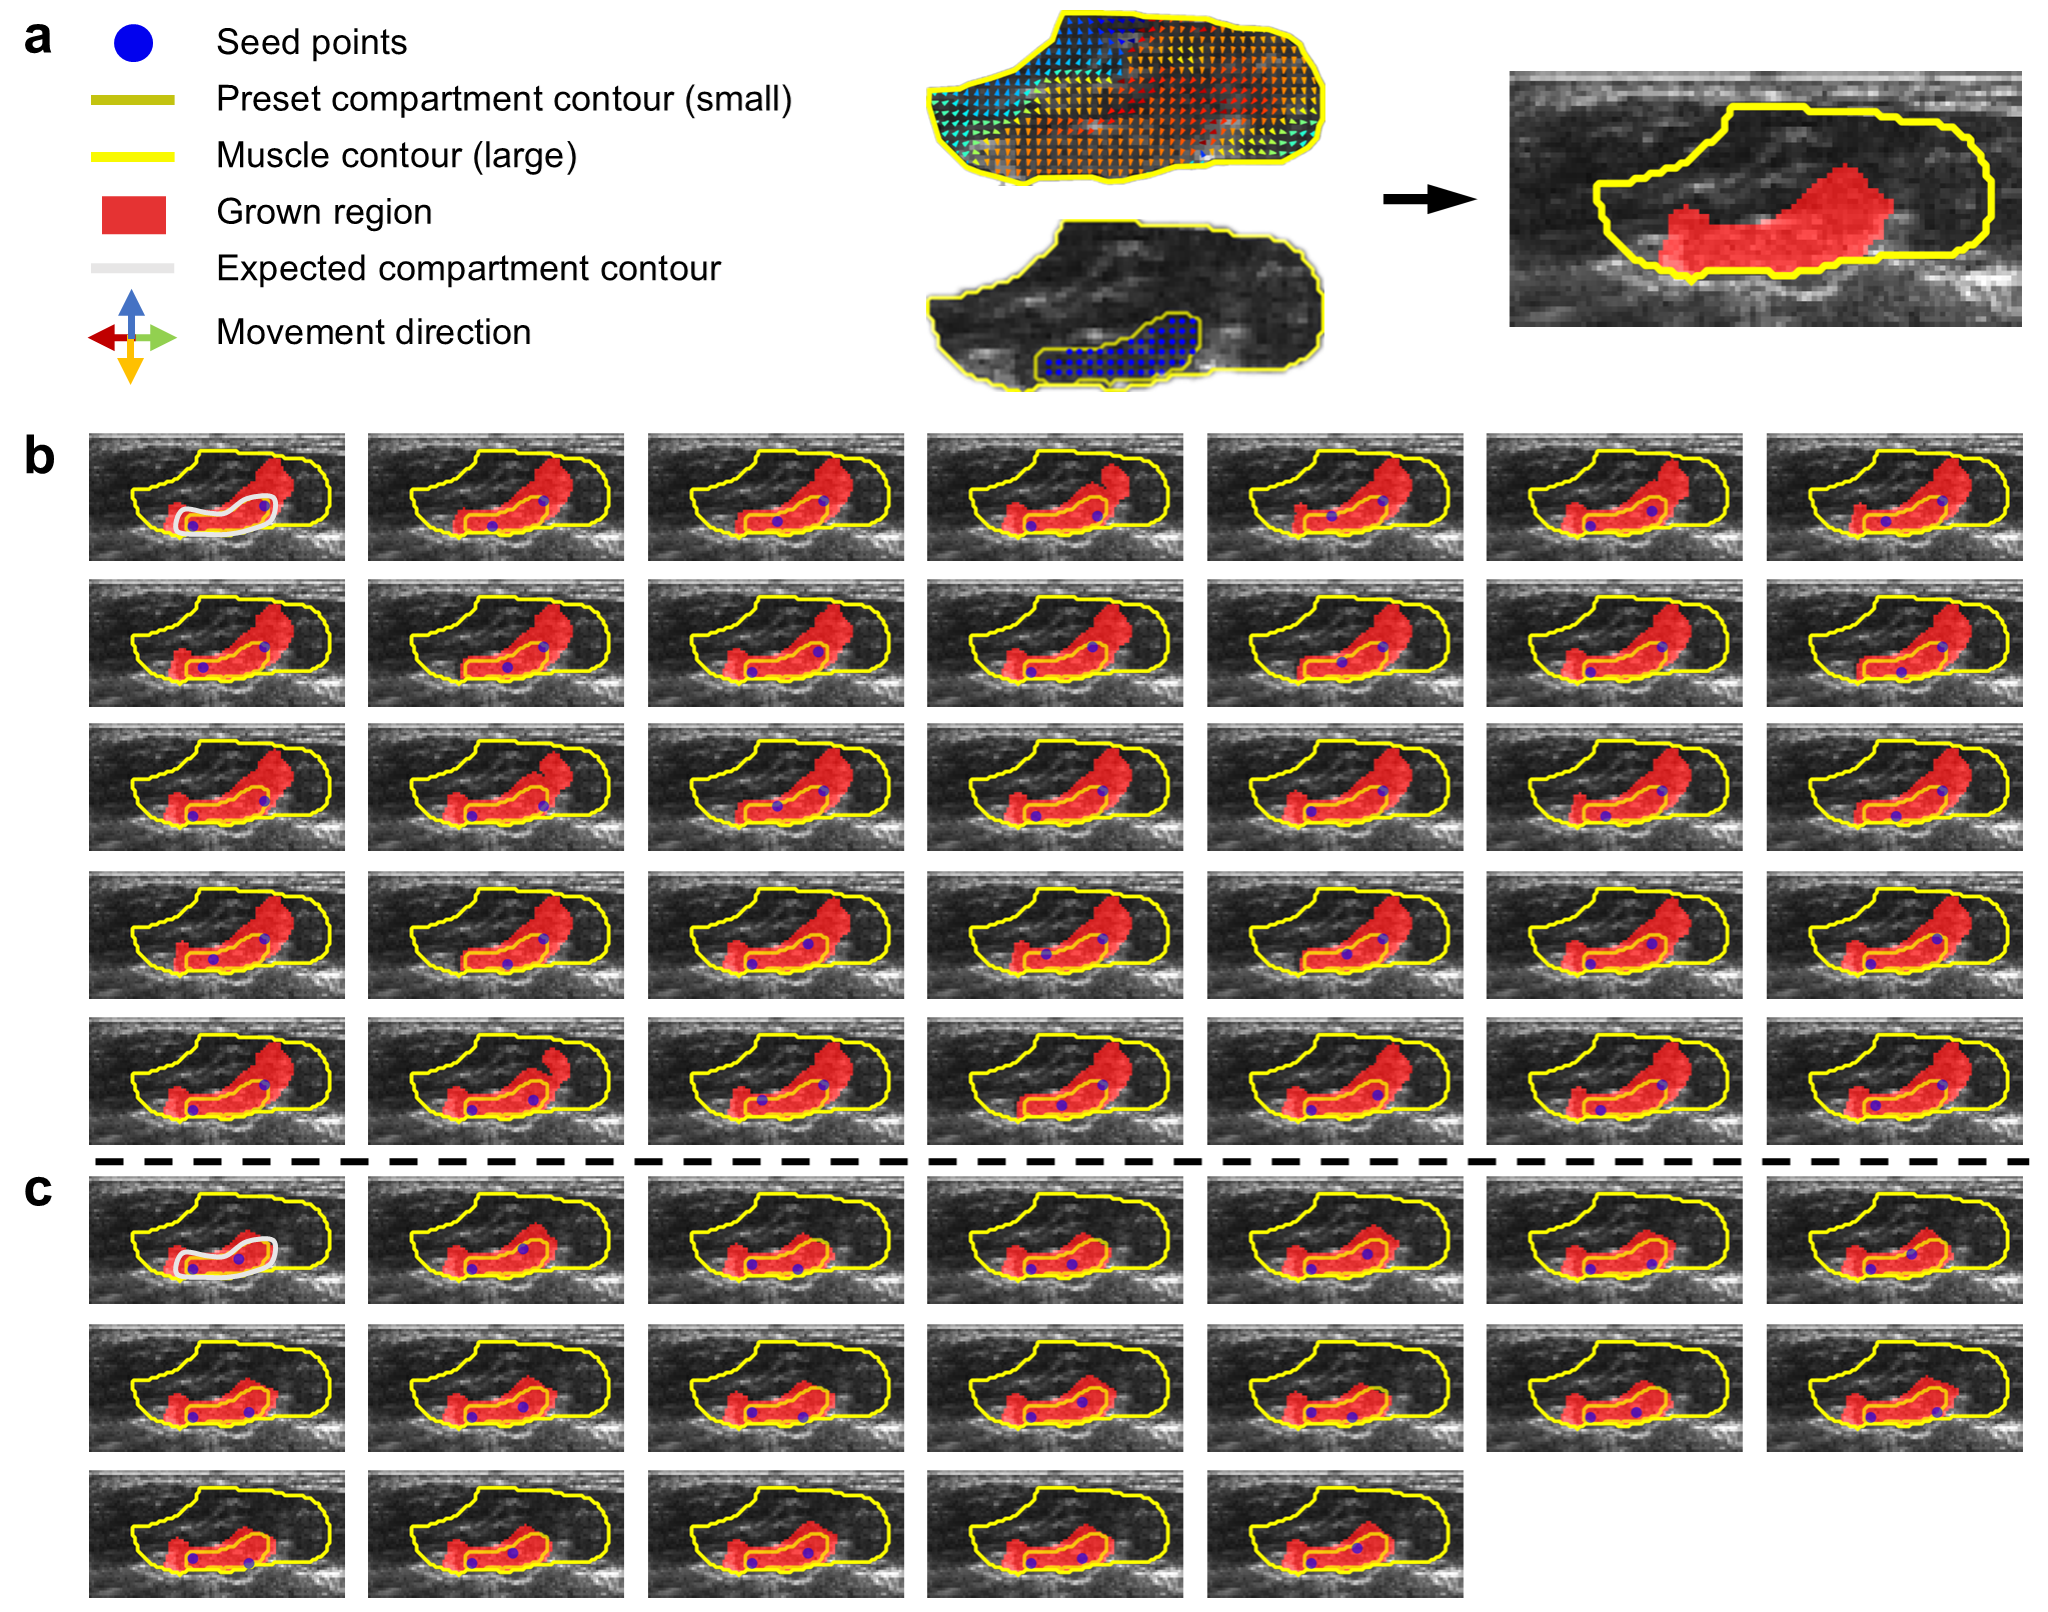


**Supplementary Fig. 5, Seed point sampling experiment of region growing algorithm for the index compartment.** The experimental procedure was as follows. First, the preset compartment contour was set based on the tissue movement direction field and anatomy. Then, two seed points were placed using farthest point sampling algorithm in the preset region. Region growing was performed for each pair of points. Finally, all the grown regions that were similar to the preset region were selected and merged to form the total region, which was also the final compartment region.

**a,** Figure legend, all the positions of the first seed point with a distance interval of 1 mm and total region (after the arrow). All the seed points were located within the preset compartment contour. The second seed point was placed at the center of the remaining area of the preset region using farthest point sampling algorithm, which can be seen in **b** and **c**. The total region was obtained by merging (“and” operation) all the selected regions in **c**. **b,** Discarded grown regions, due to the hole or redundancy.The first image of **b** shows the redundancy relative to the expected compartment contour. The expected contour was slightly larger than the preset contour.If there is any hole, the regions will be directly discarded. If the redundant area exceeds twice the preset region, it will be discarded. **c,** Selected grown regions, which did not have obvious holes or redundancies compared to the expected compartment contour (see the first image of **c**).


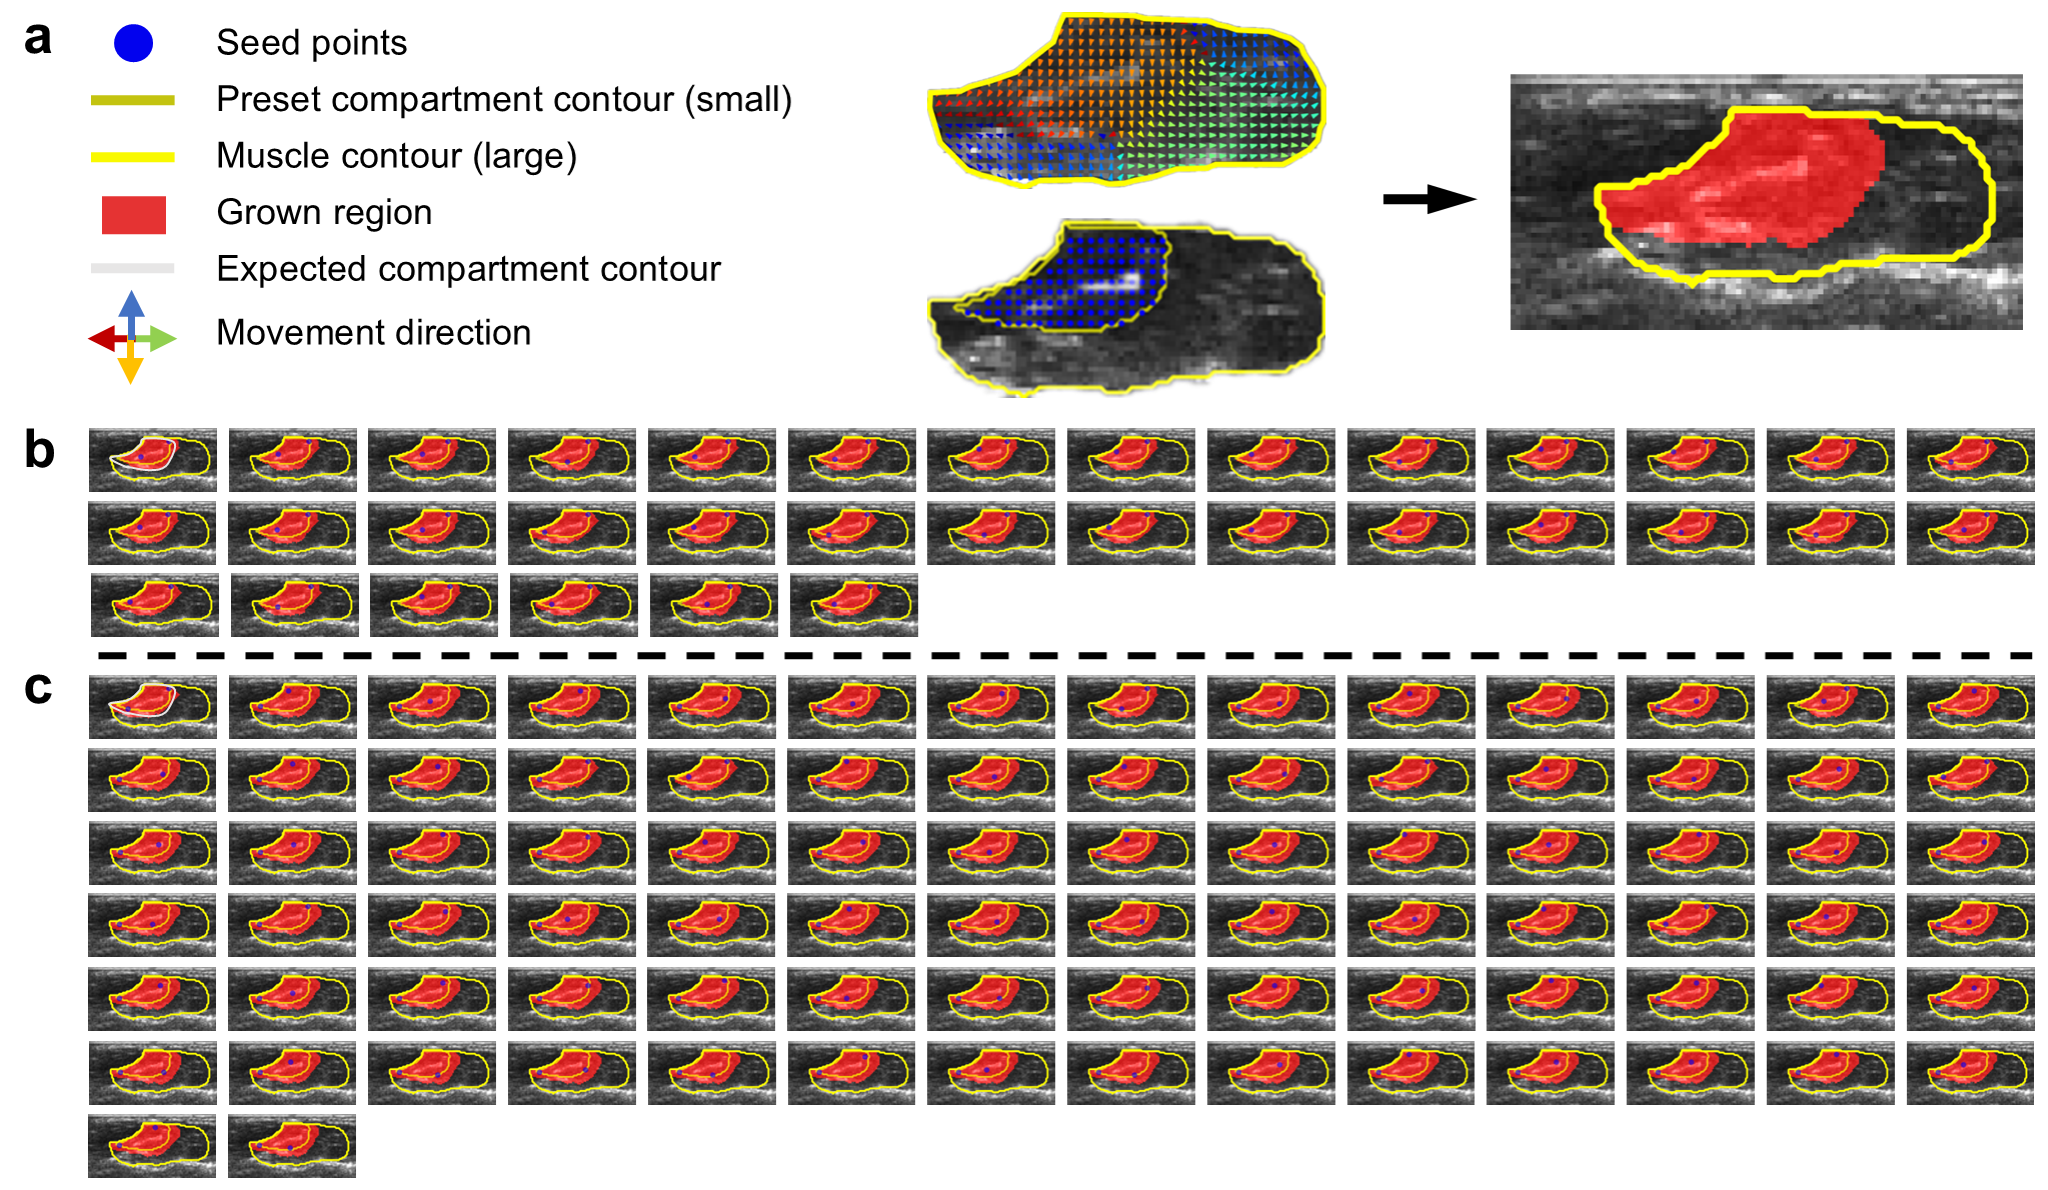


**Supplementary Fig. 6, Seed point sampling experiment of region growing algorithm for the middle compartment.** The experimental procedure was as follows. First, the preset compartment contour was set based on the tissue movement direction field and anatomy. Then, two seed points were placed using farthest point sampling algorithm in the preset region. Region growing was performed for each pair of points. Finally, all the grown regions that were similar to the preset region were selected and merged to form the total region, which was also the final compartment region.

**a,** Figure legend, all the positions of the first seed point with a distance interval of 1 mm and total region (after the arrow). All the seed points were located within the preset compartment contour. The second seed point was placed at the center of the remaining area of the preset region using farthest point sampling algorithm, which can be seen in **b** and **c**. The total region was obtained by merging (“and” operation) all the selected regions in **c**. **b,** Discarded grown regions, due to the hole or redundancy.The first image of **b** shows the hole relative to the expected compartment contour. The expected contour was slightly larger than the preset contour.If there is any hole, the regions will be directly discarded. If the redundant area exceeds twice the preset region, it will be discarded. **c,** Selected grown regions, which did not have obvious holes or redundancies compared to the expected compartment contour (see the first image of **c**).


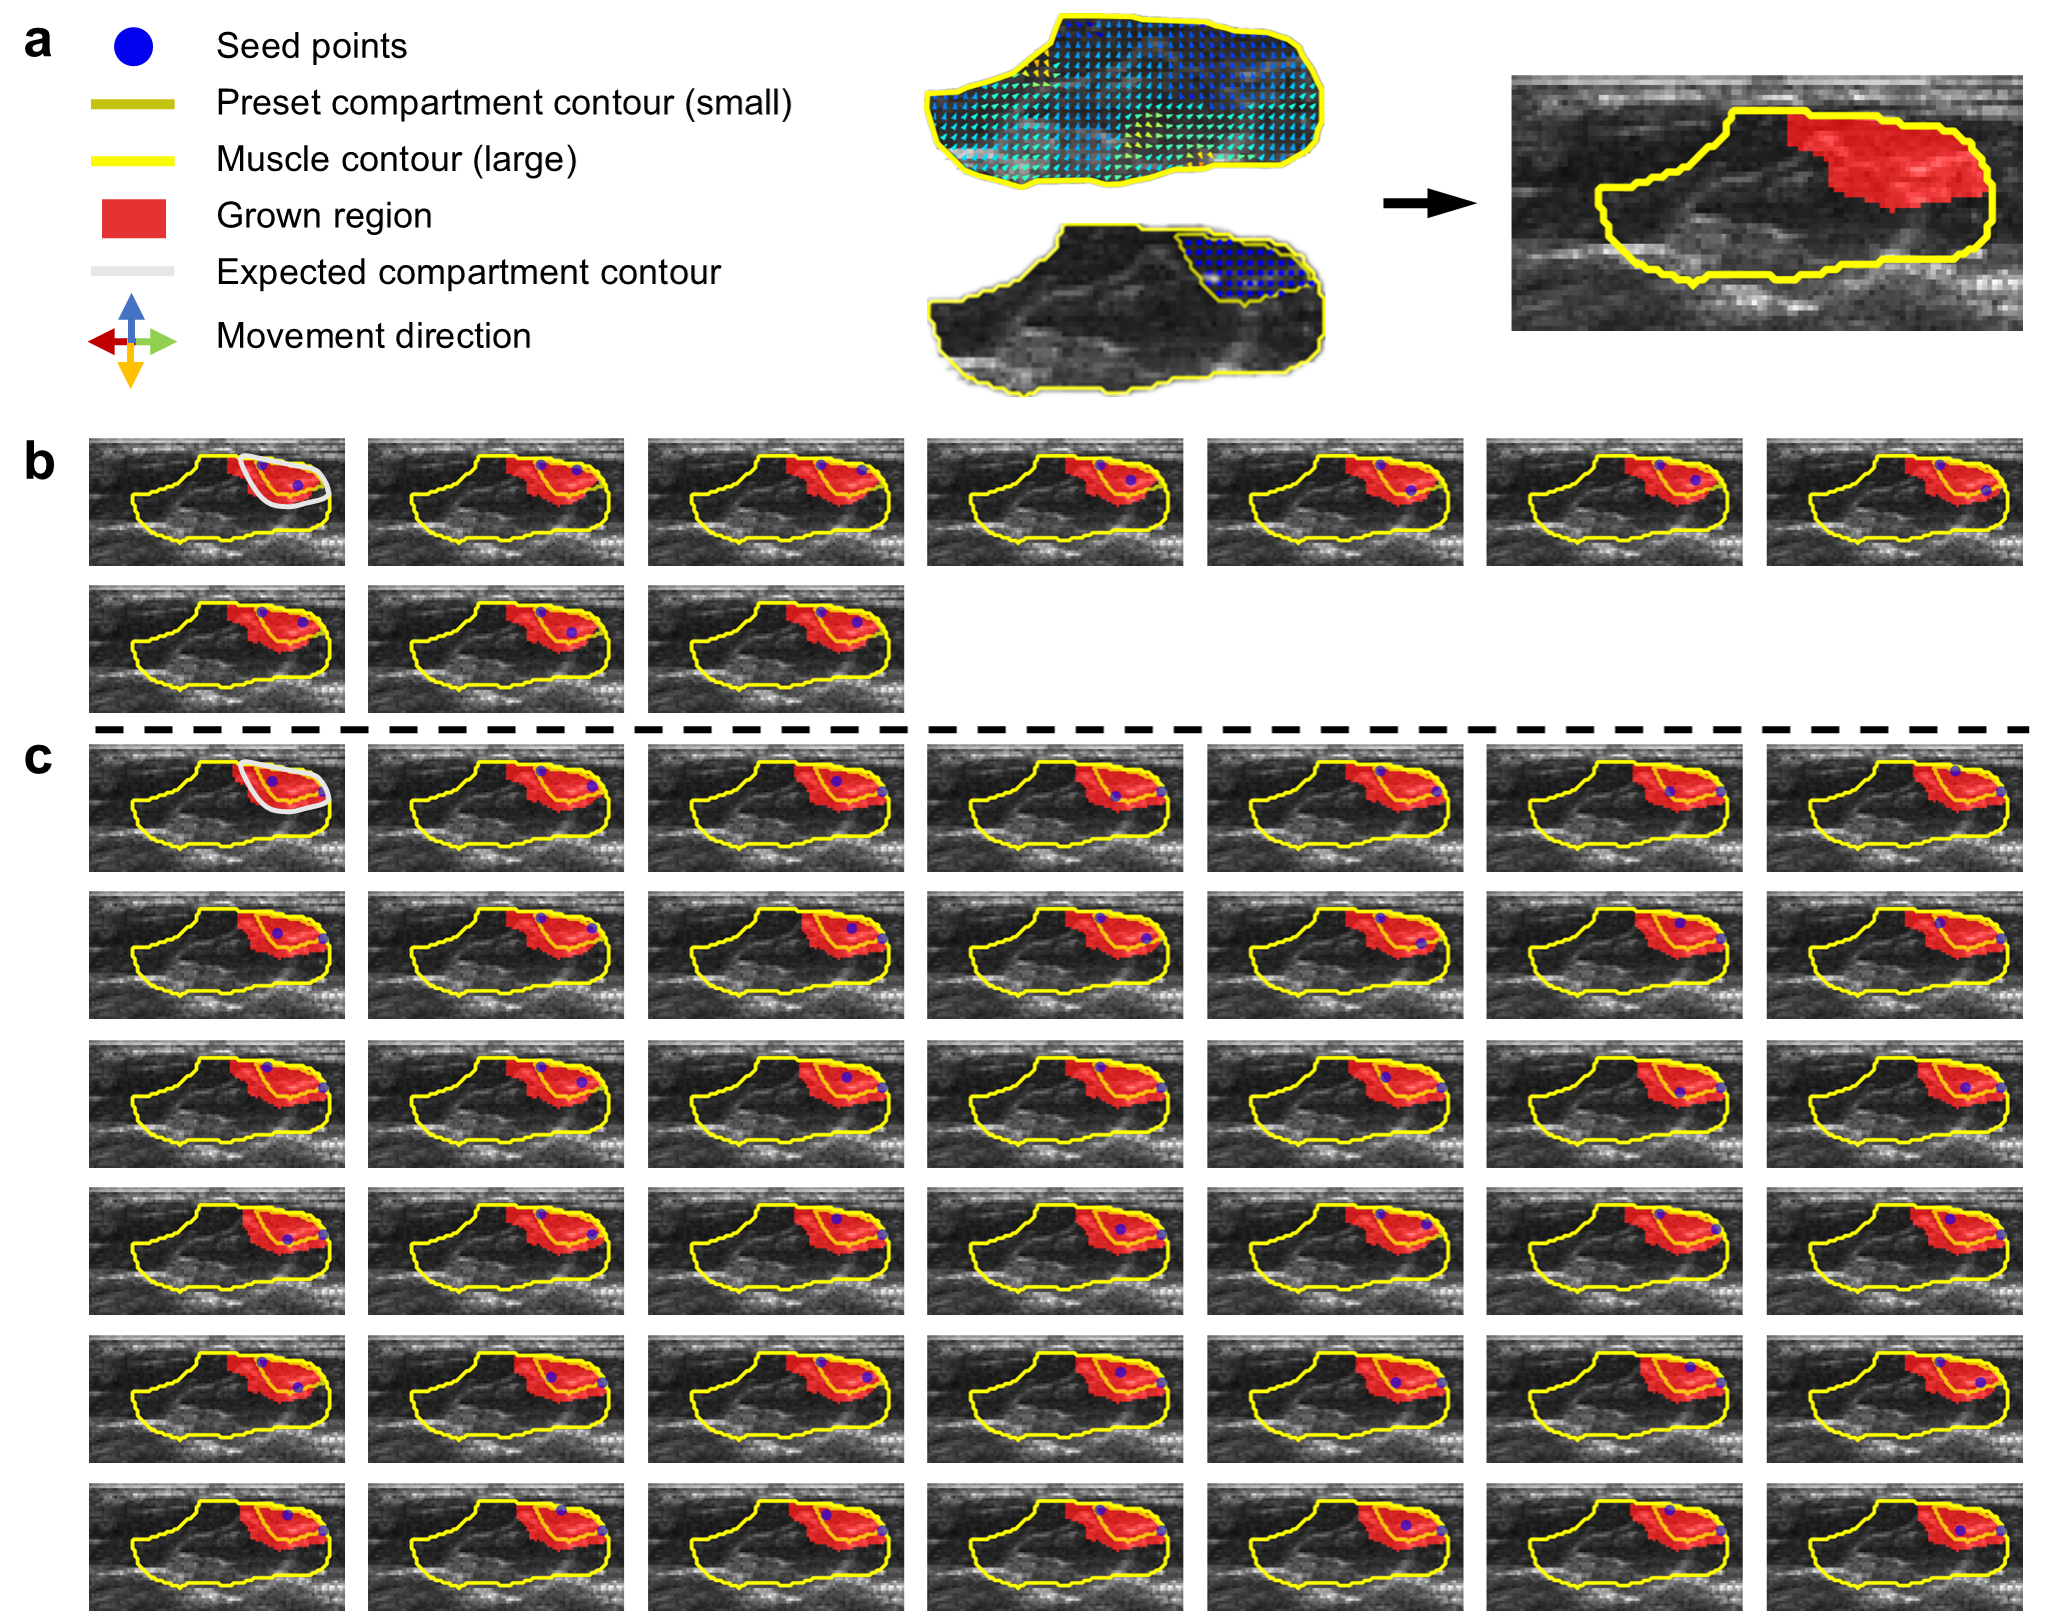


**Supplementary Fig. 7,** **Seed point sampling experiment of region growing algorithm for the ring compartment.** The experimental procedure was as follows. First, the preset compartment contour was set based on the tissue movement direction field and anatomy. Then, two seed points were placed using farthest point sampling algorithm in the preset region. Region growing was performed for each pair of points. Finally, all the grown regions that were similar to the preset region were selected and merged to form the total region, which was also the final compartment region.

**a,** Figure legend, all the positions of the first seed point with a distance interval of 1 mm and total region (after the arrow). All the seed points were located within the preset compartment contour. The second seed point was placed at the center of the remaining area of the preset region using farthest point sampling algorithm, which can be seen in **b** and **c**. The total region was obtained by merging (“and” operation) all the selected regions in **c**. **b,** Discarded grown regions, due to the hole or redundancy.The first image of **b** shows the hole relative to the expected compartment contour. The expected contour was slightly larger than the preset contour.If there is any hole, the regions will be directly discarded. If the redundant area exceeds twice the preset region, it will be discarded. **c,** Selected grown regions, which did not have obvious holes or redundancies compared to the expected compartment contour (see the first image of **c**).


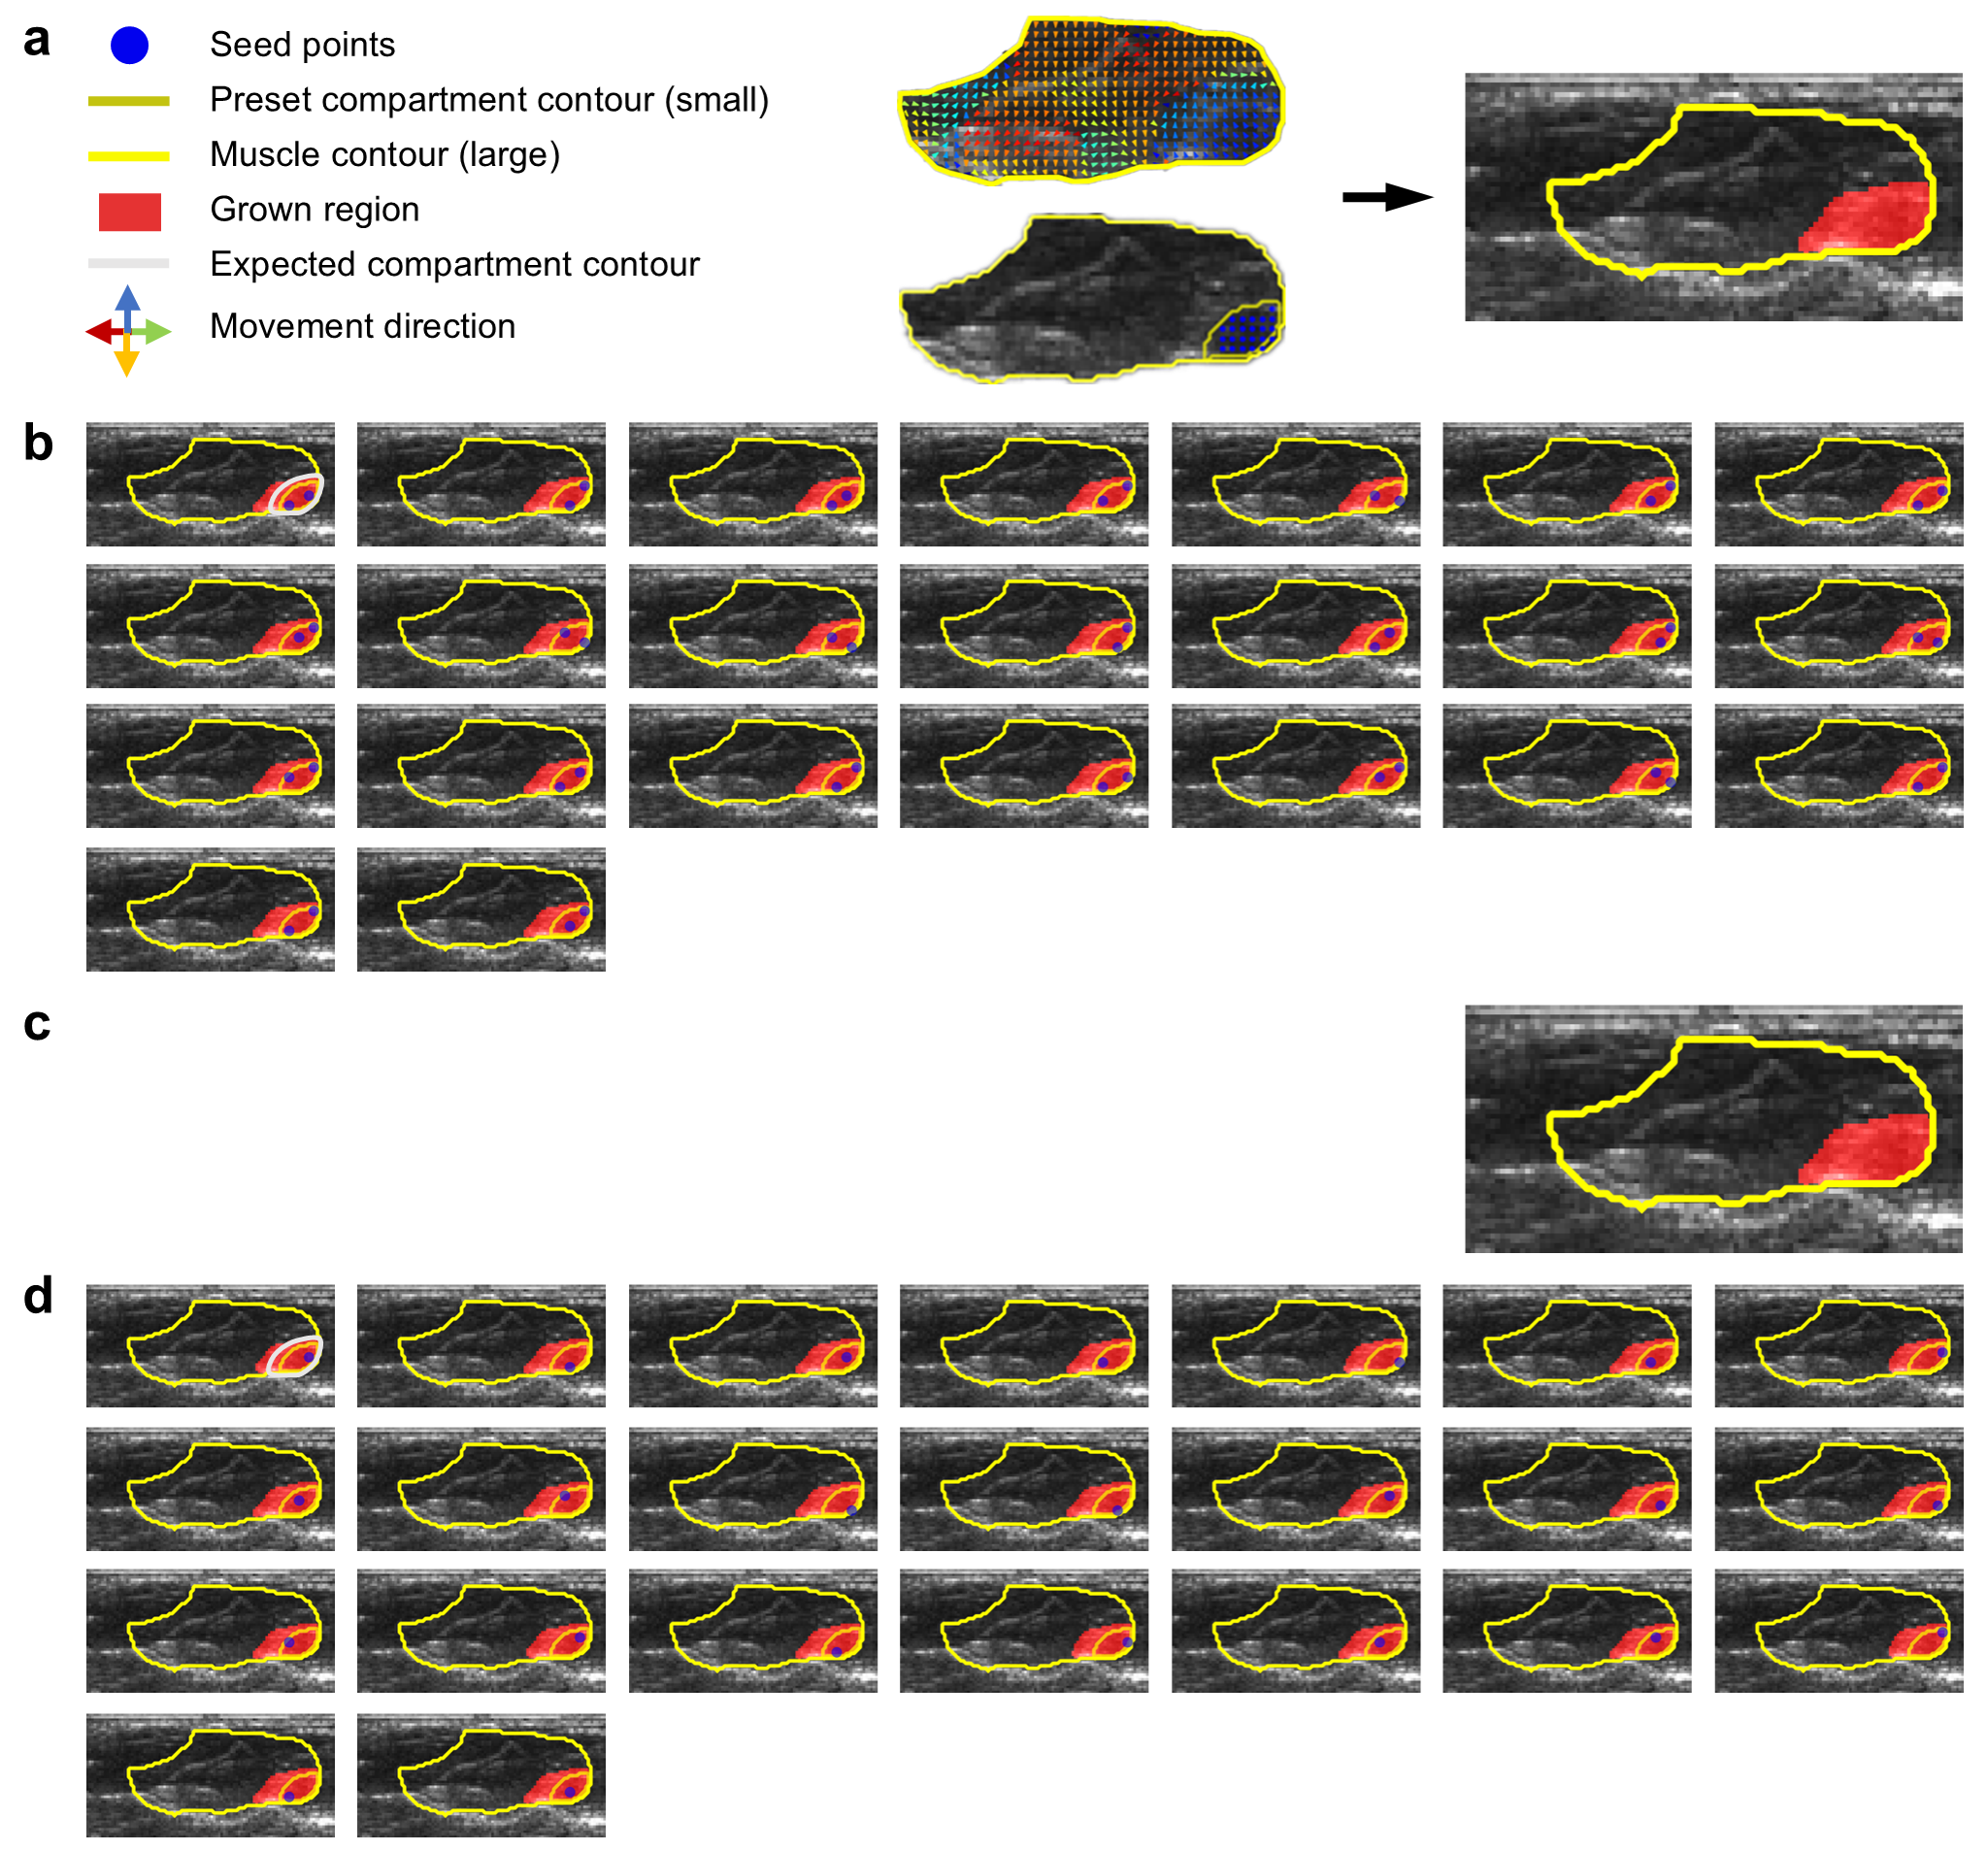


**Supplementary Fig. 8, Seed point sampling experiment of region growing algorithm for the little compartment.** The experimental procedure was as follows. First, the preset compartment contour was set based on the tissue movement direction field and anatomy. Then, two seed points were placed using farthest point sampling algorithm in the preset region. Region growing was performed for each pair of points. Finally, all the grown regions that were similar to the preset region were selected and merged to form the total region, which was also the final compartment region. **When using two seed points, there was almost no difference in the grown regions. Therefore, using two seed points may not be necessary. Region growing using a single seed point was performed, which was also the same as when using two seed points, indicating that the movement direction of the little compartment was significantly different from the direction of the adjacent regions.**

**a,** Figure legend, all the positions of the first seed point with a distance interval of 1 mm and total region (after the arrow). All the seed points were located within the preset compartment contour. The second seed point was placed at the center of the remaining area of the preset region using farthest point sampling algorithm, which can be seen in **b**. The total region was obtained by merging (“and” operation) all the selected regions in **b**. **b,** Selected grown regions (from two seed points), which did not have obvious holes or redundancies compared to the expected compartment contour (see the first image of **c**). The expected contour was slightly larger than the preset contour. **Panels c and d follow the same procedure as panels a and b, except that region growing was performed using a single seed point.**


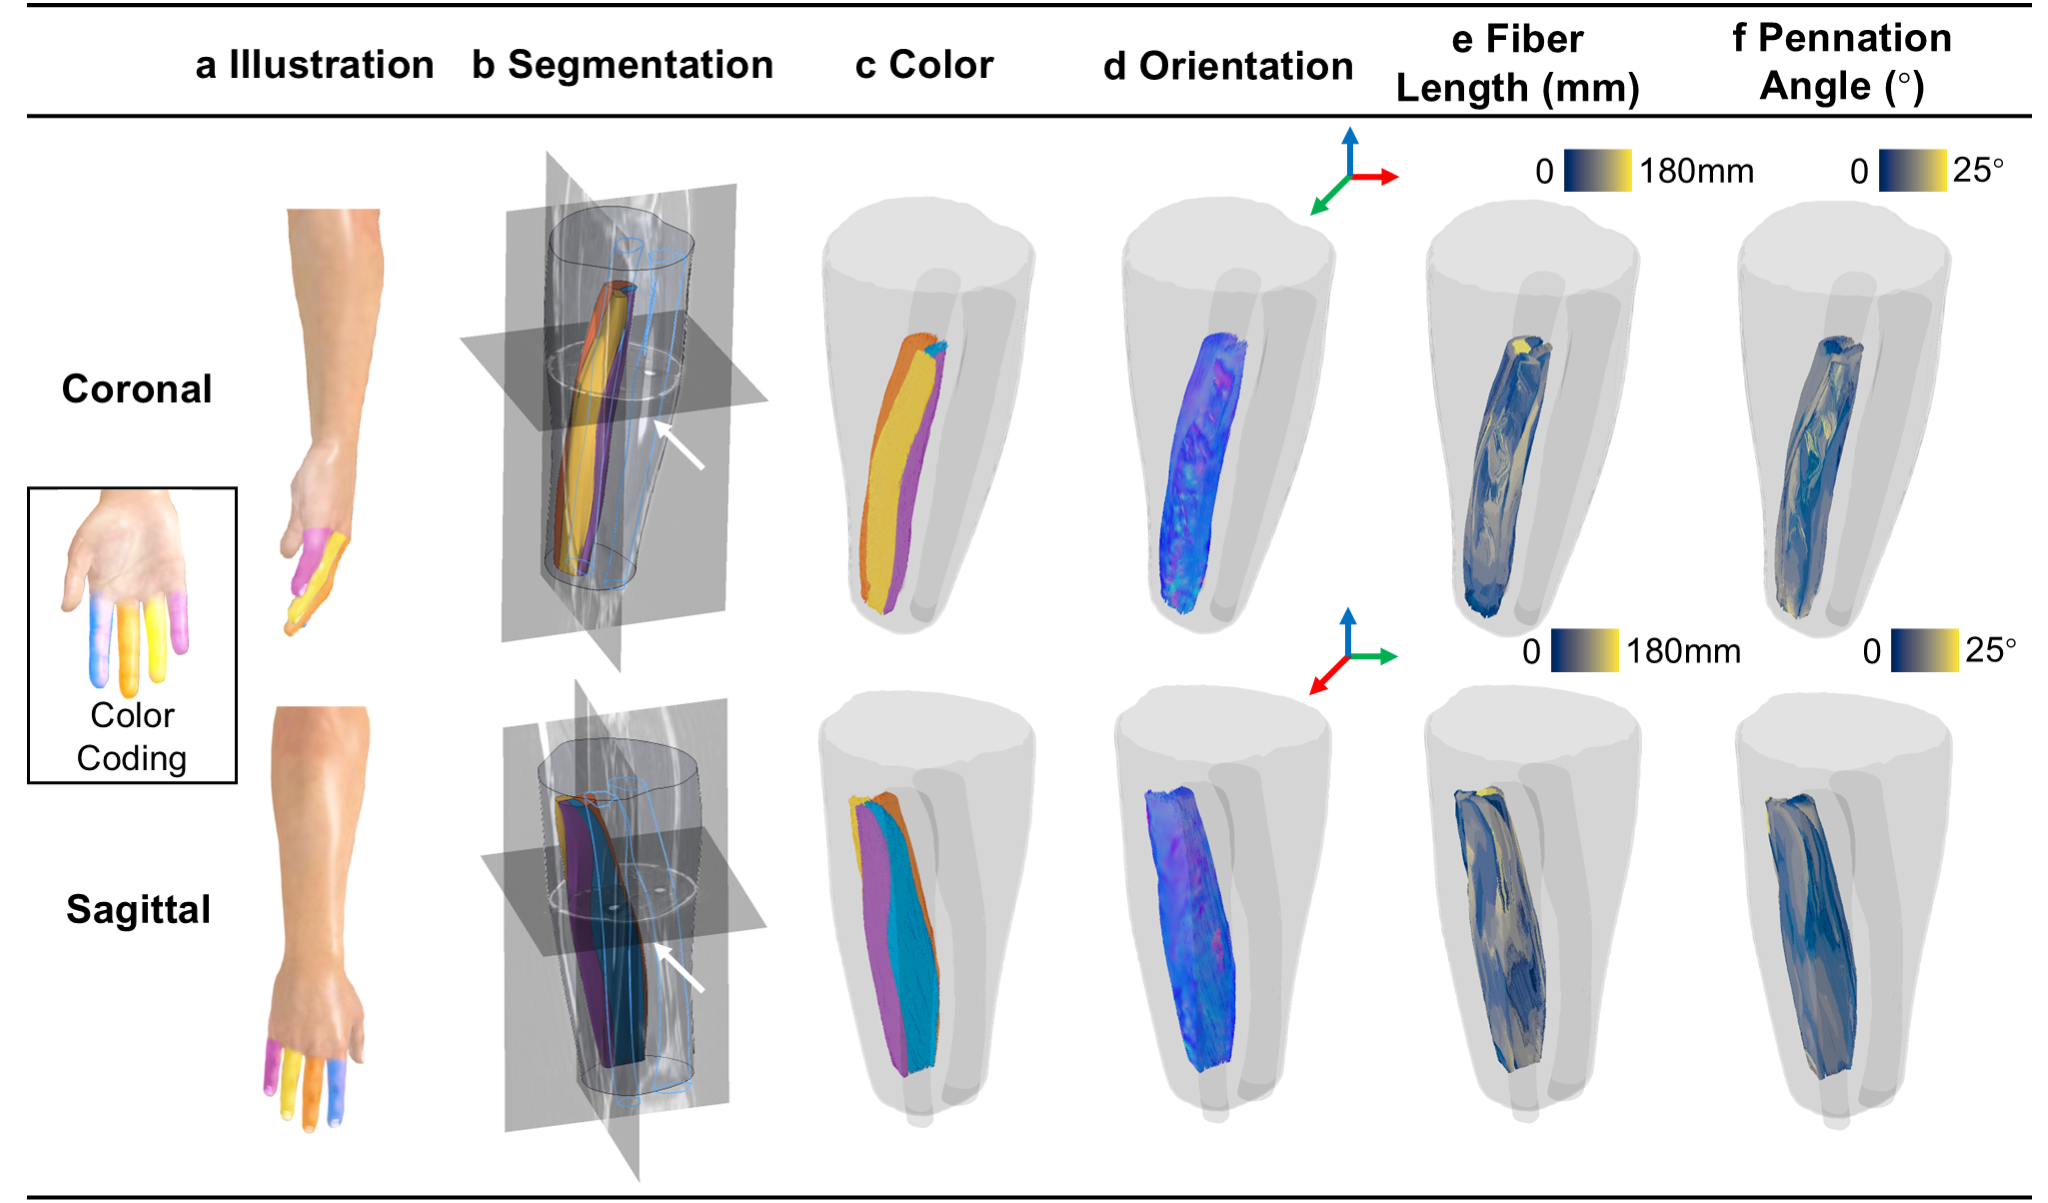


**Supplementary Fig. 9, Fiber tractography of flexor digitorum superficialis (FDS) muscle compartments in coronal and sagittal views,** listed as **a,** illustration; **b,** segmentation; and tractography color-coded by **c,** compartment, **d,** orientation, **e,** fiber length and **f,** pennation angle. Same compartment colors were added to **a, b** and **c**.


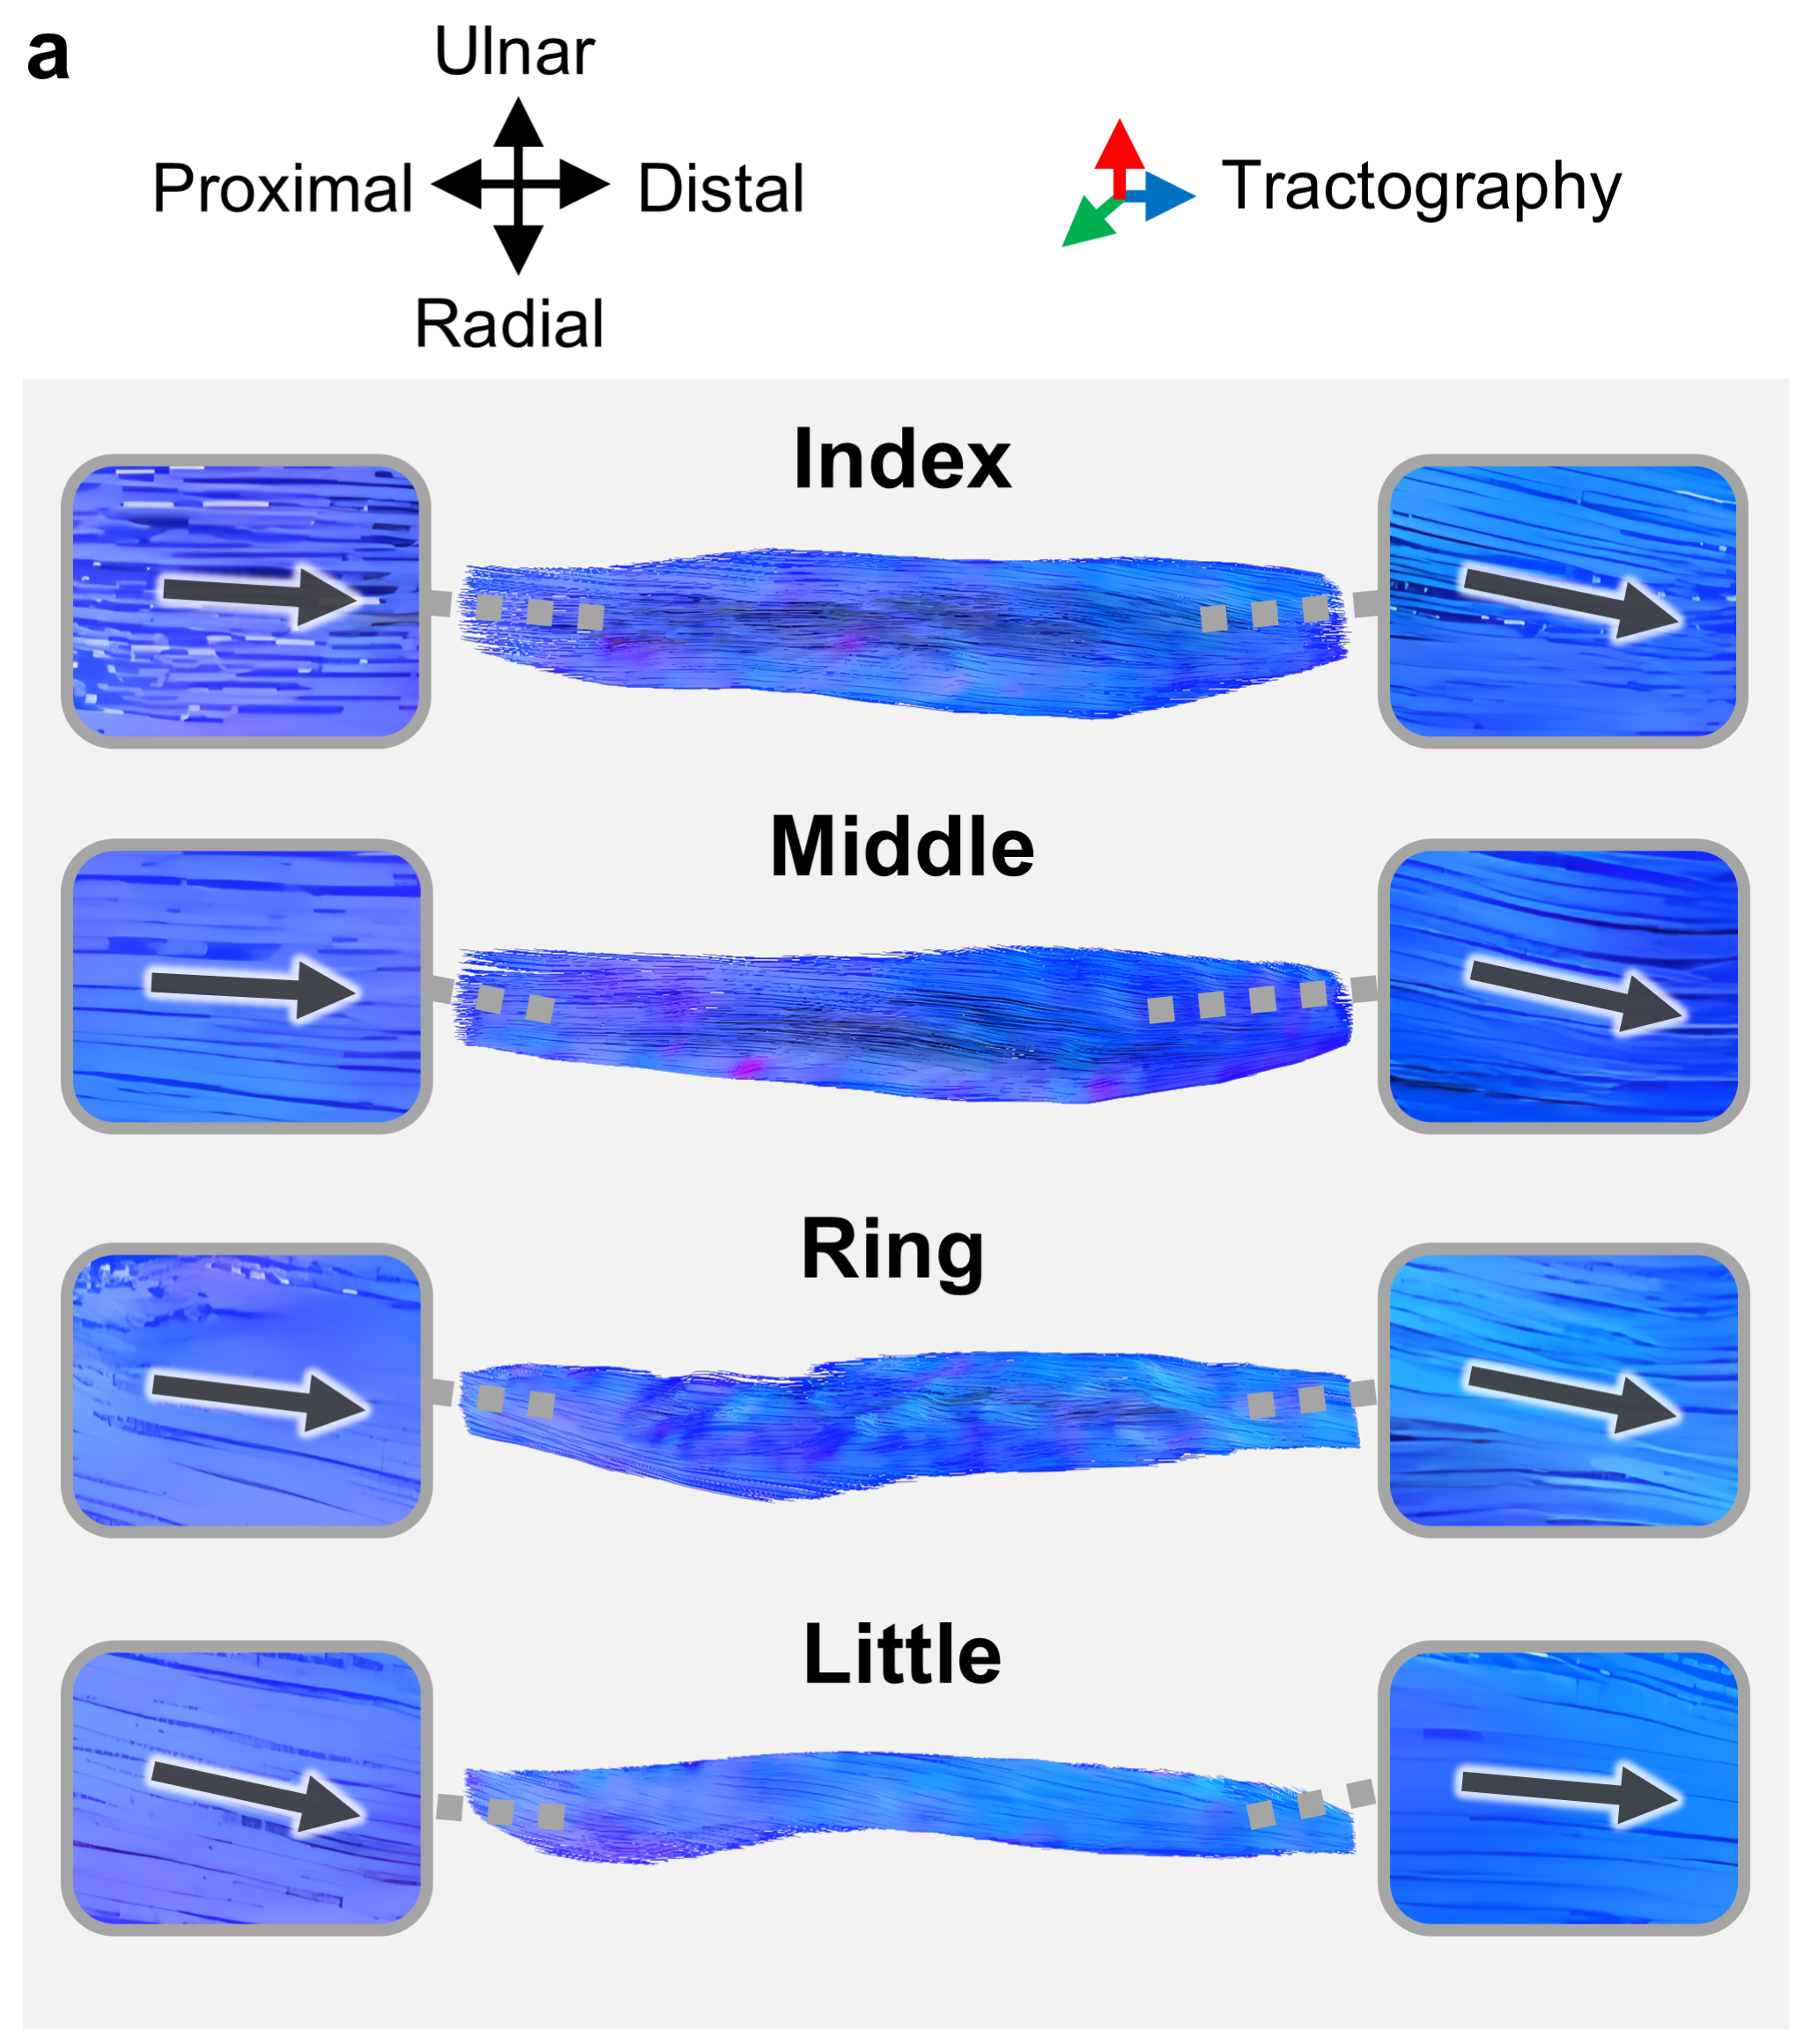

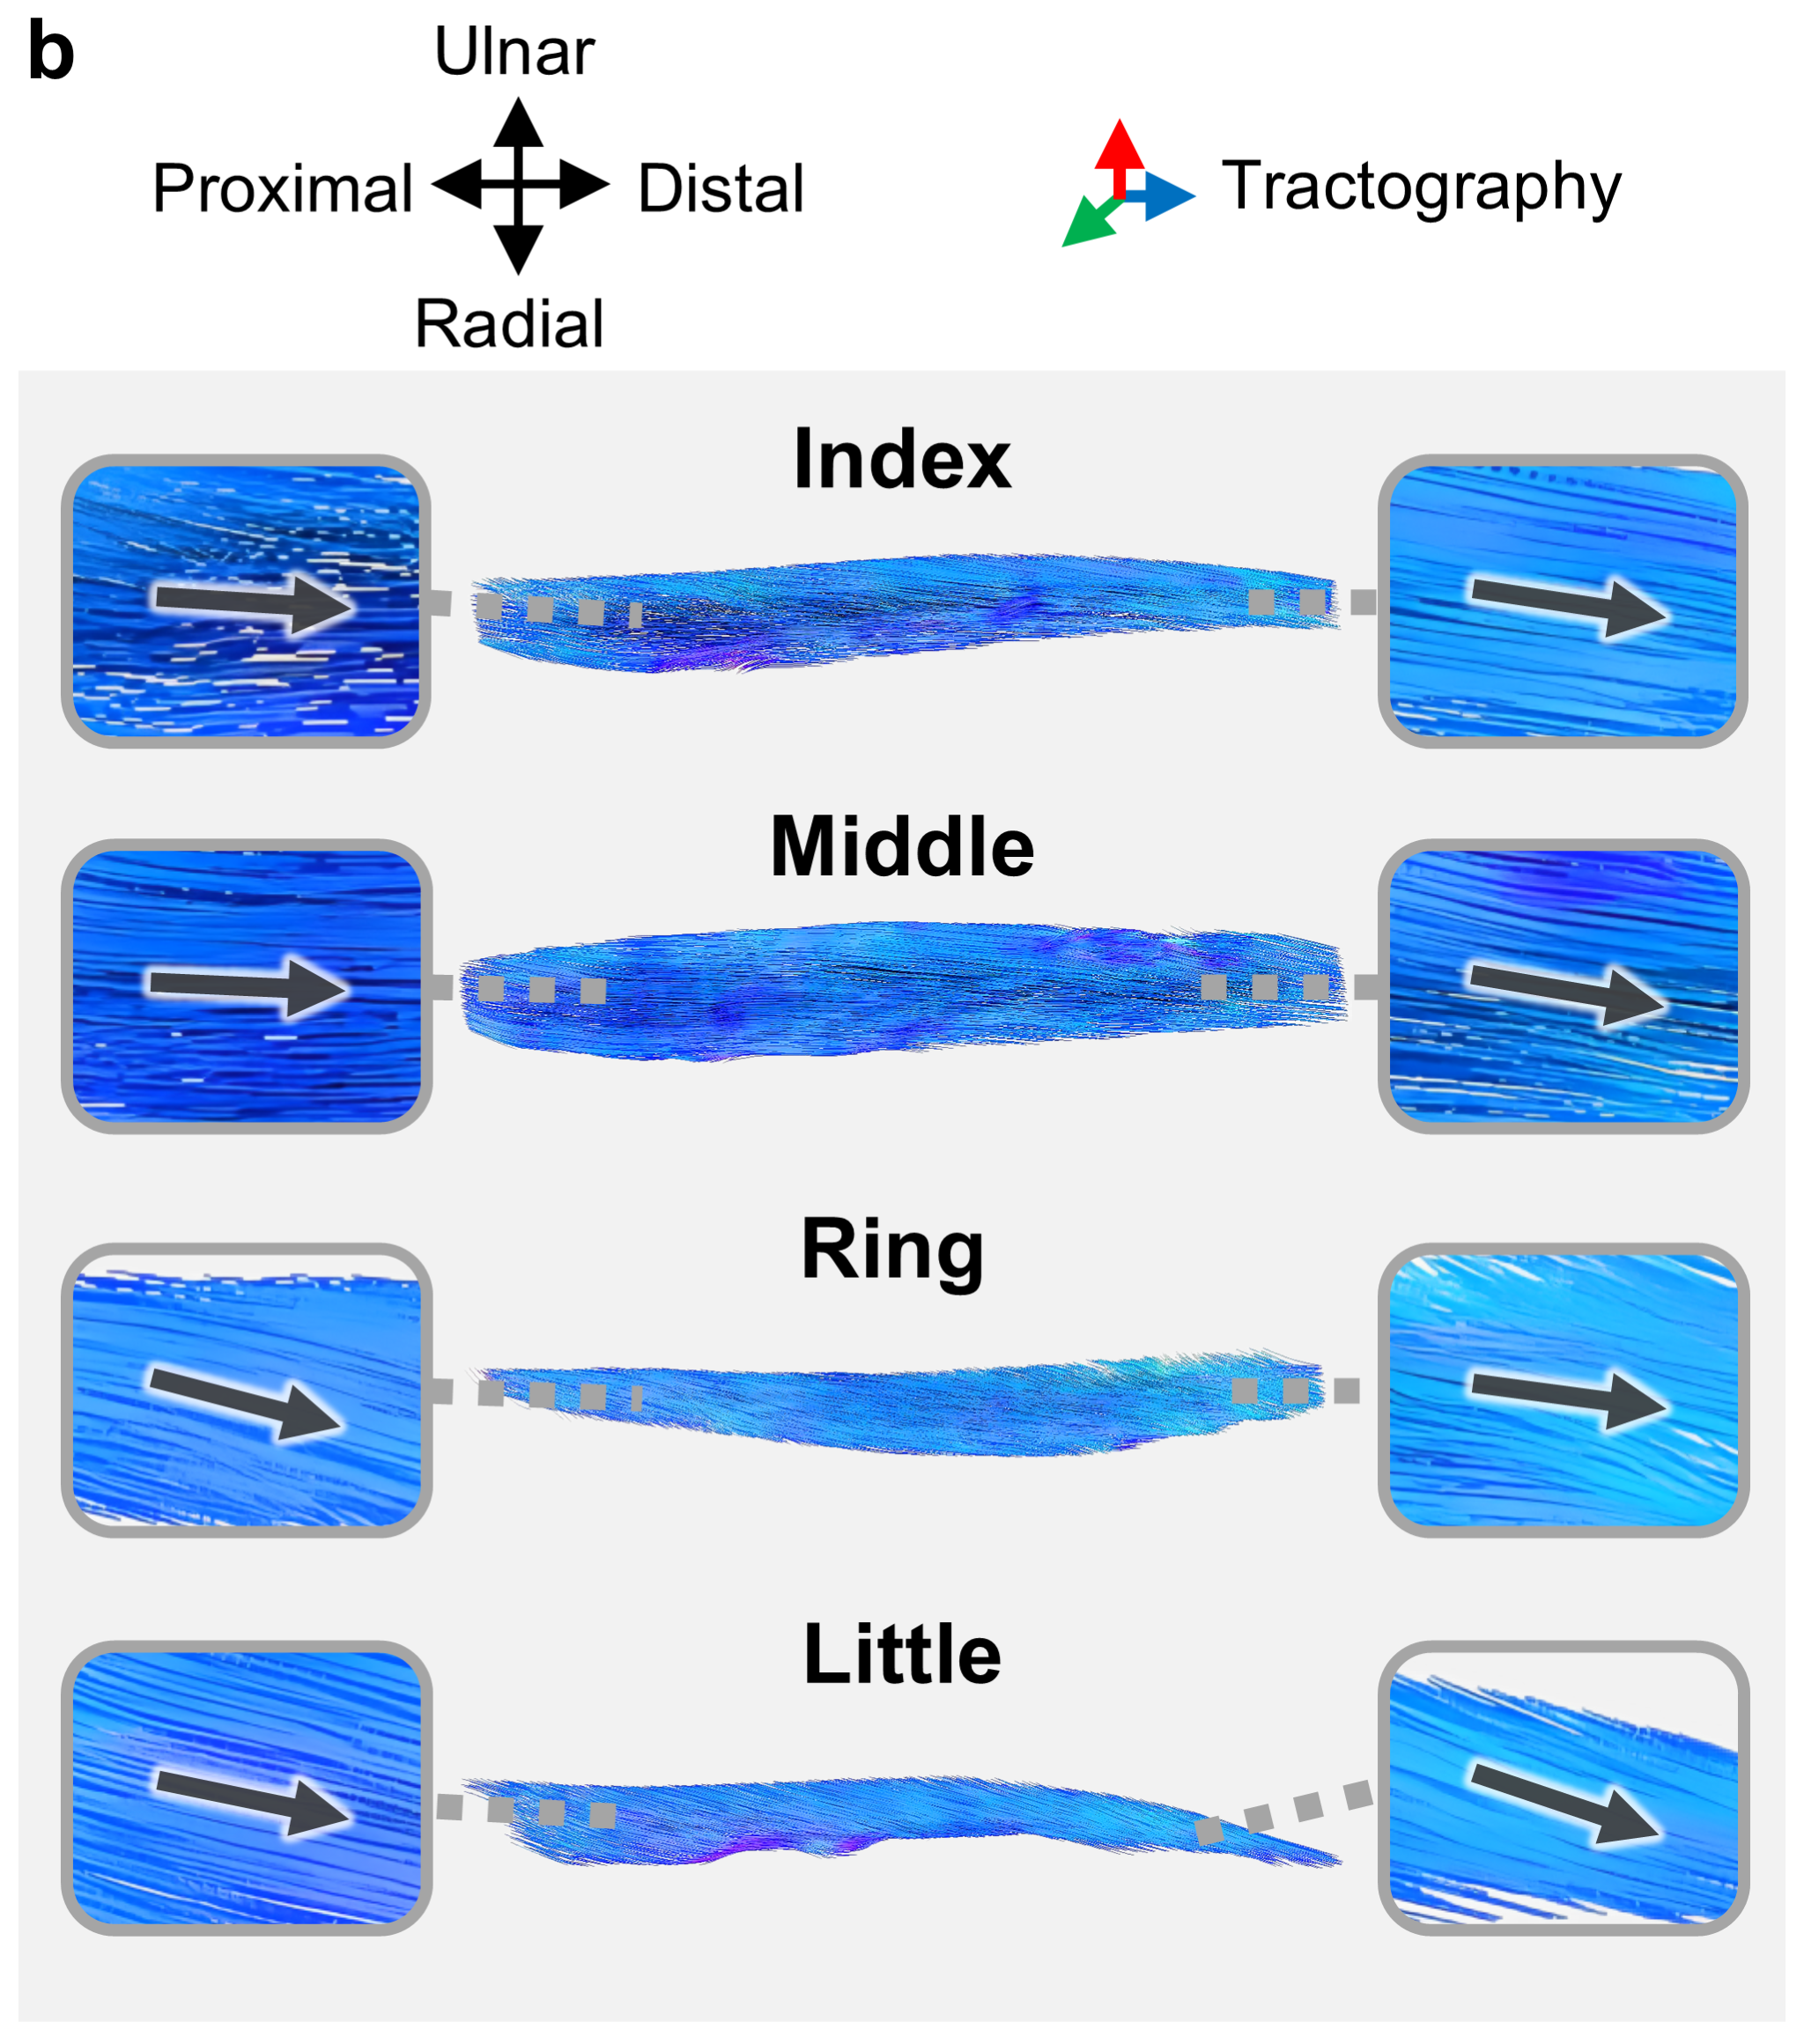


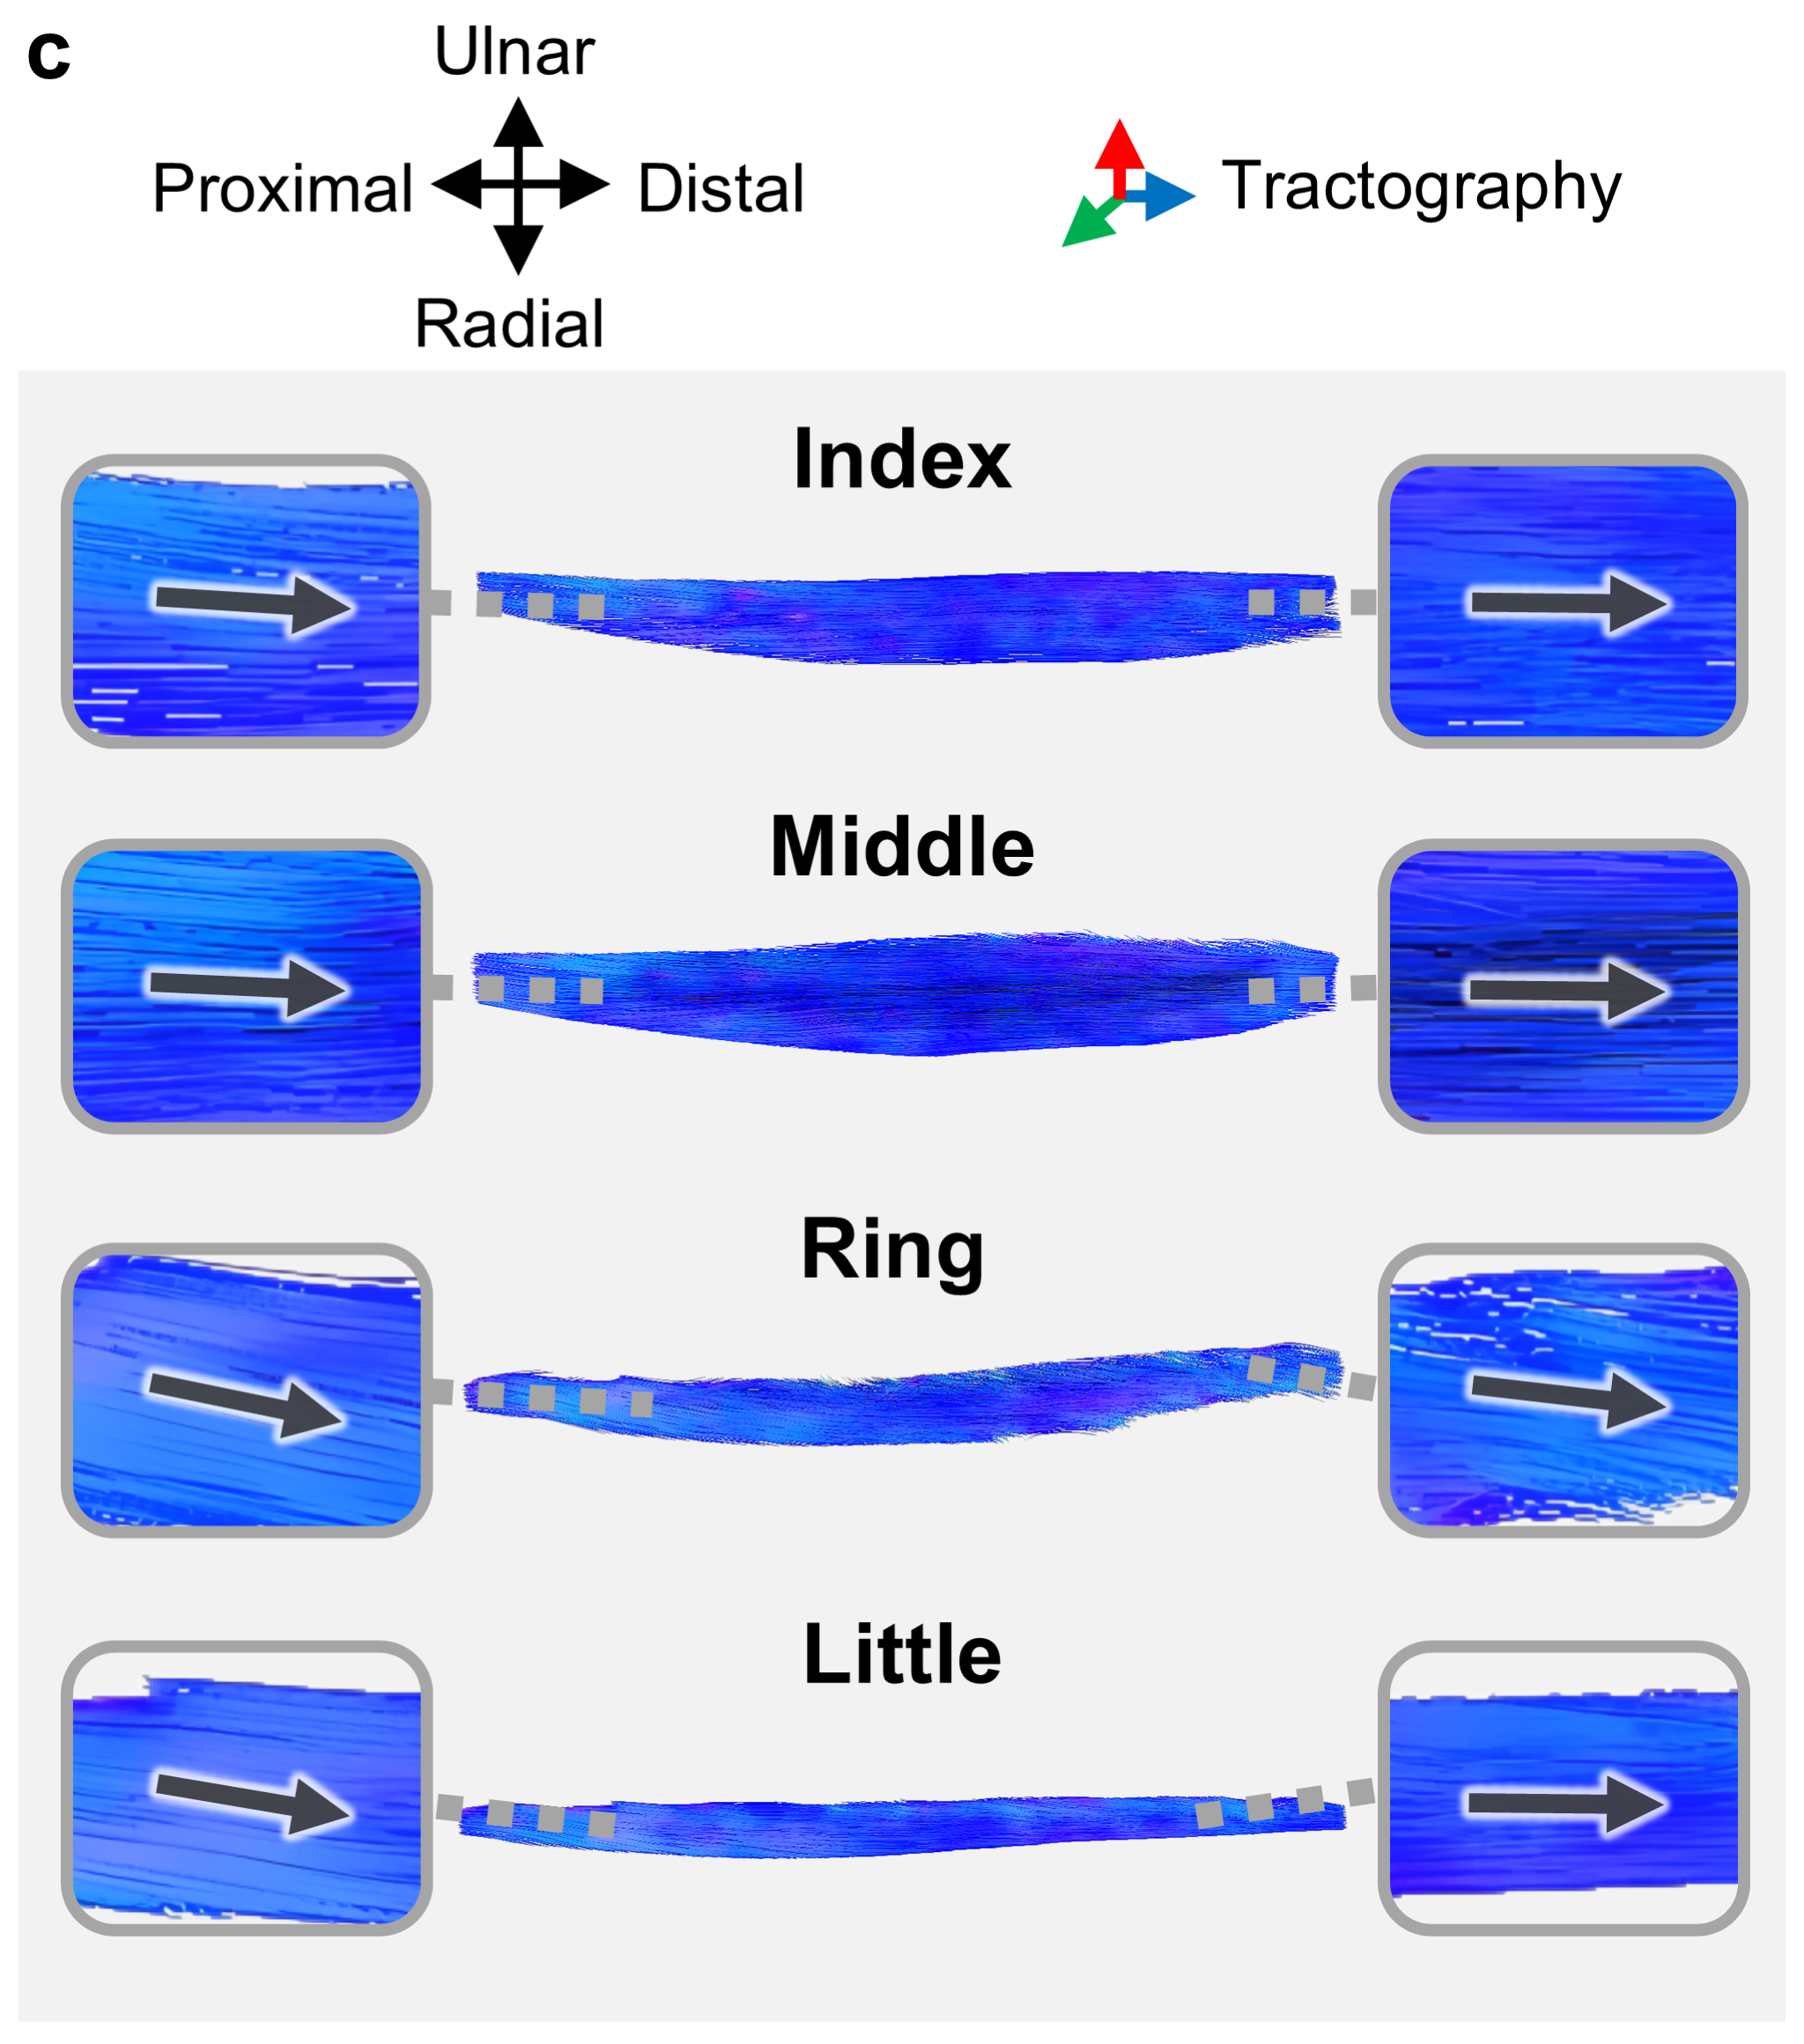

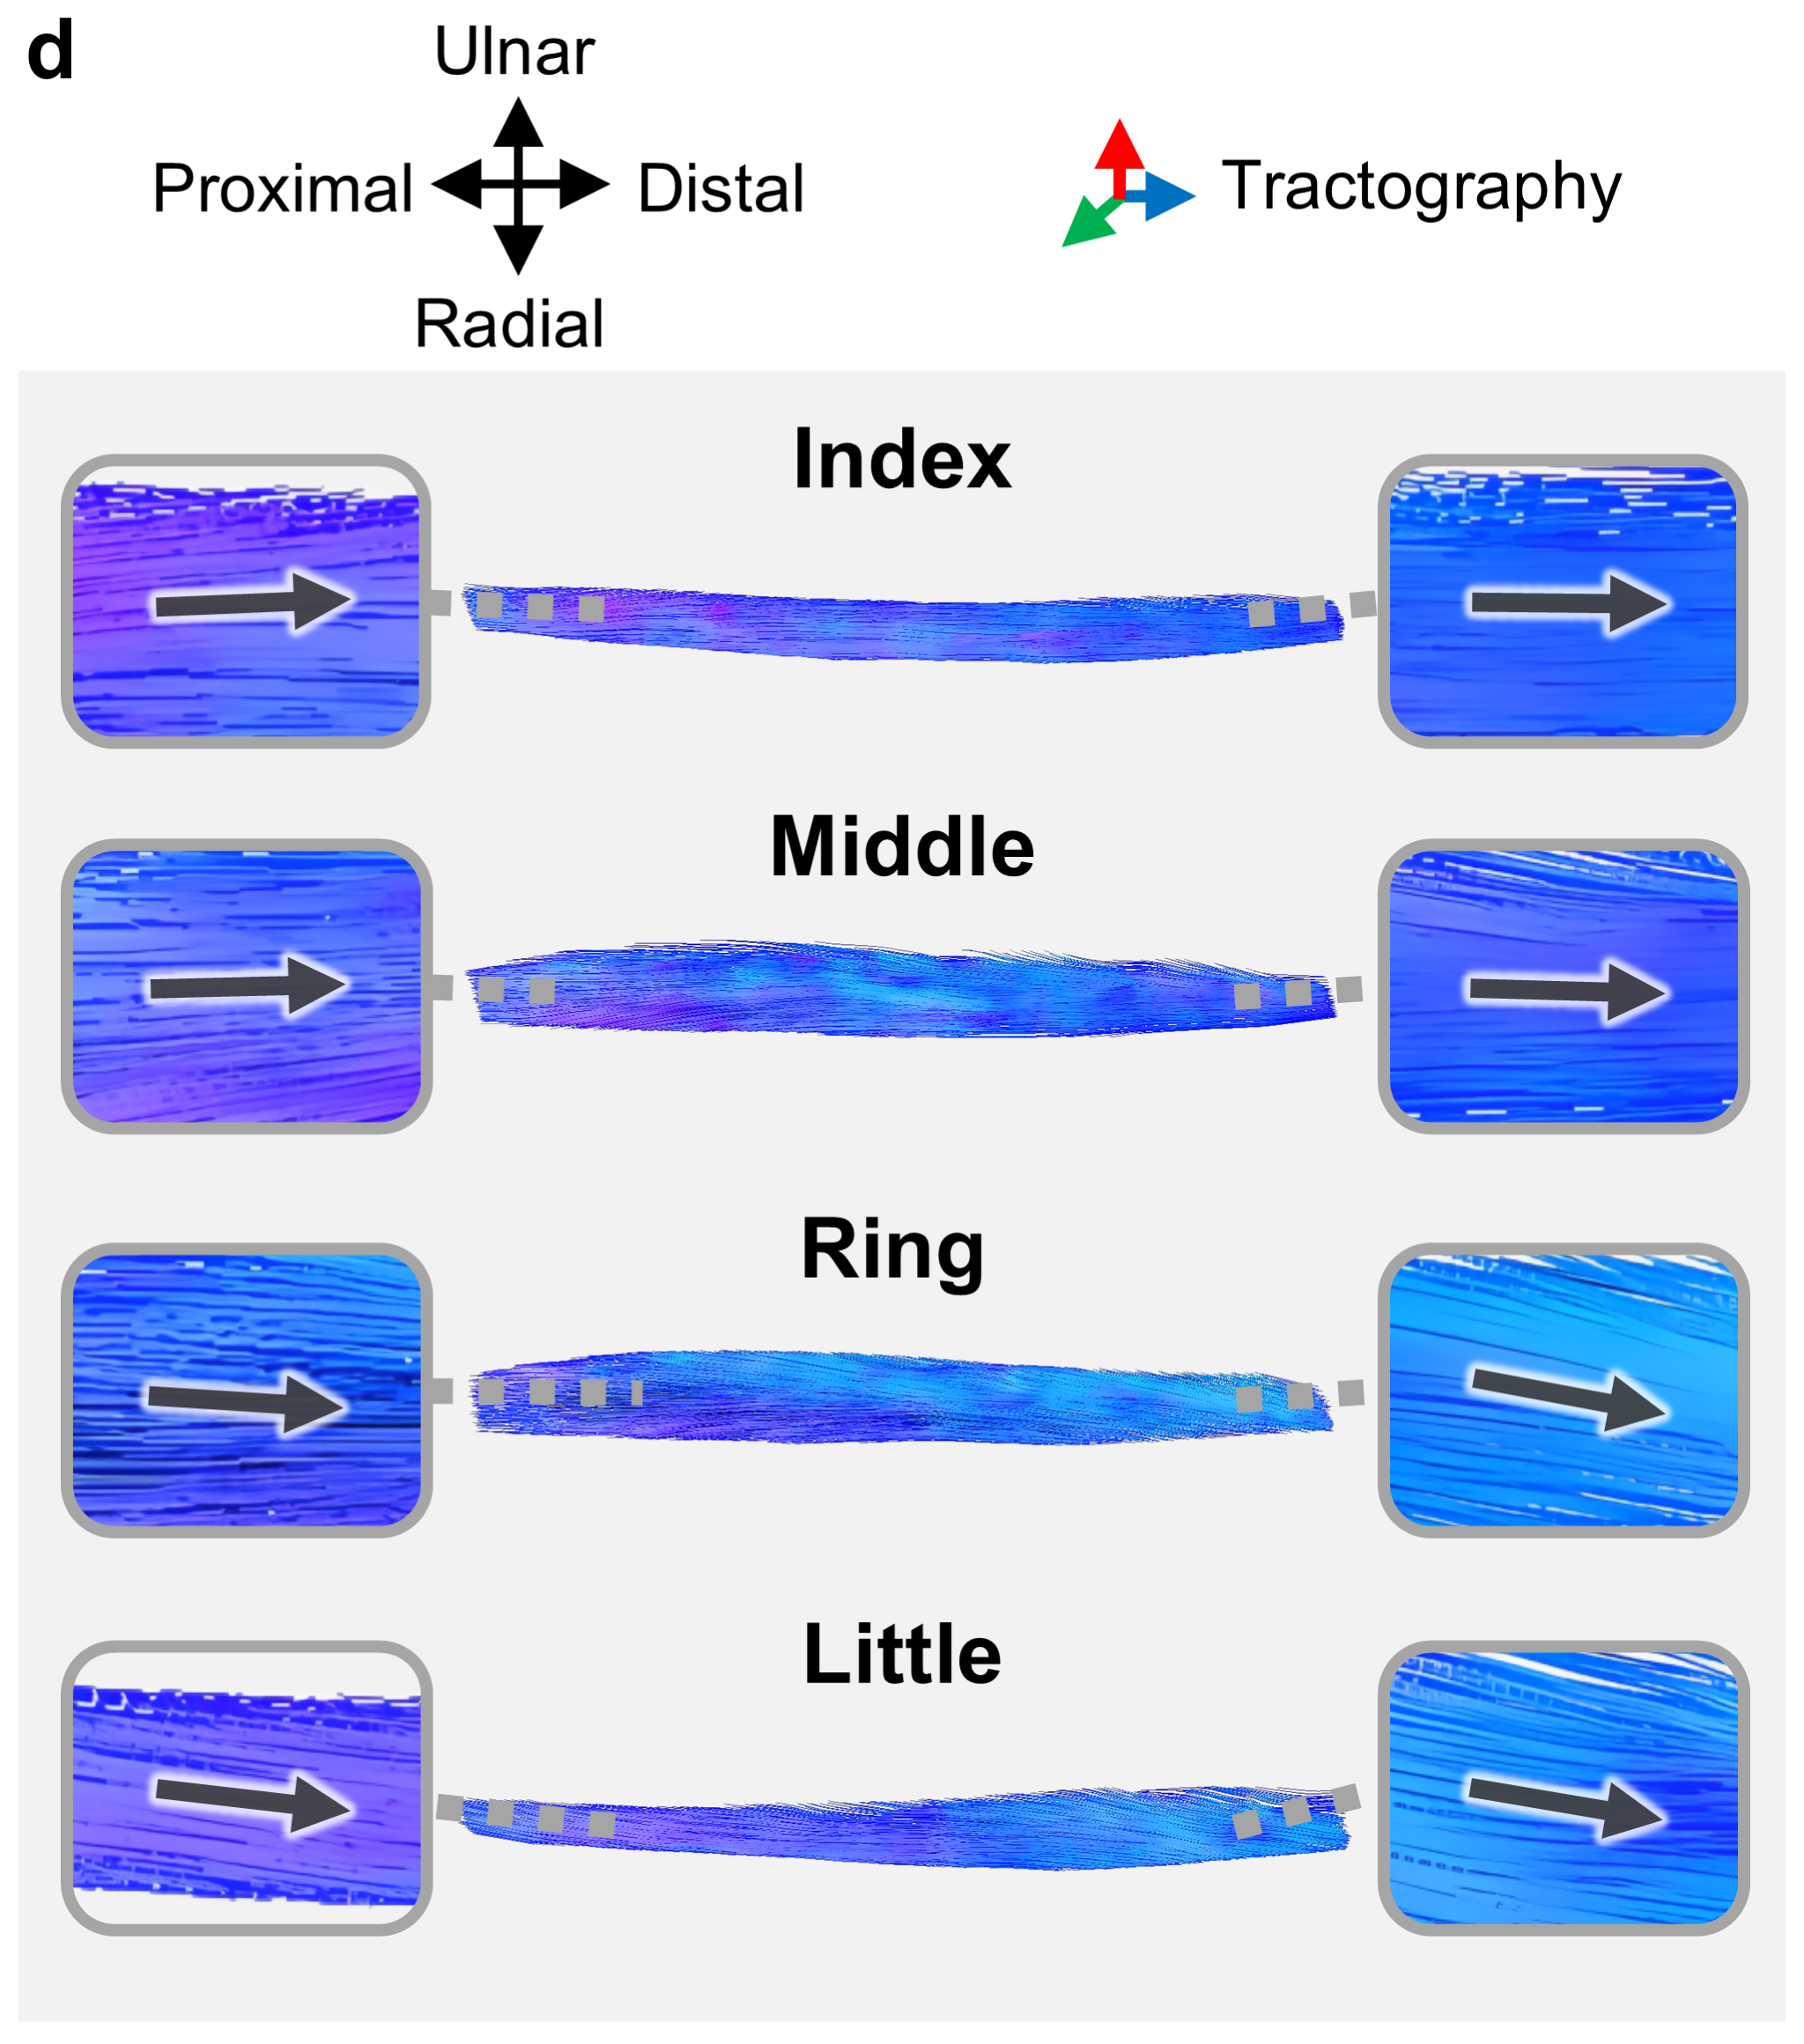


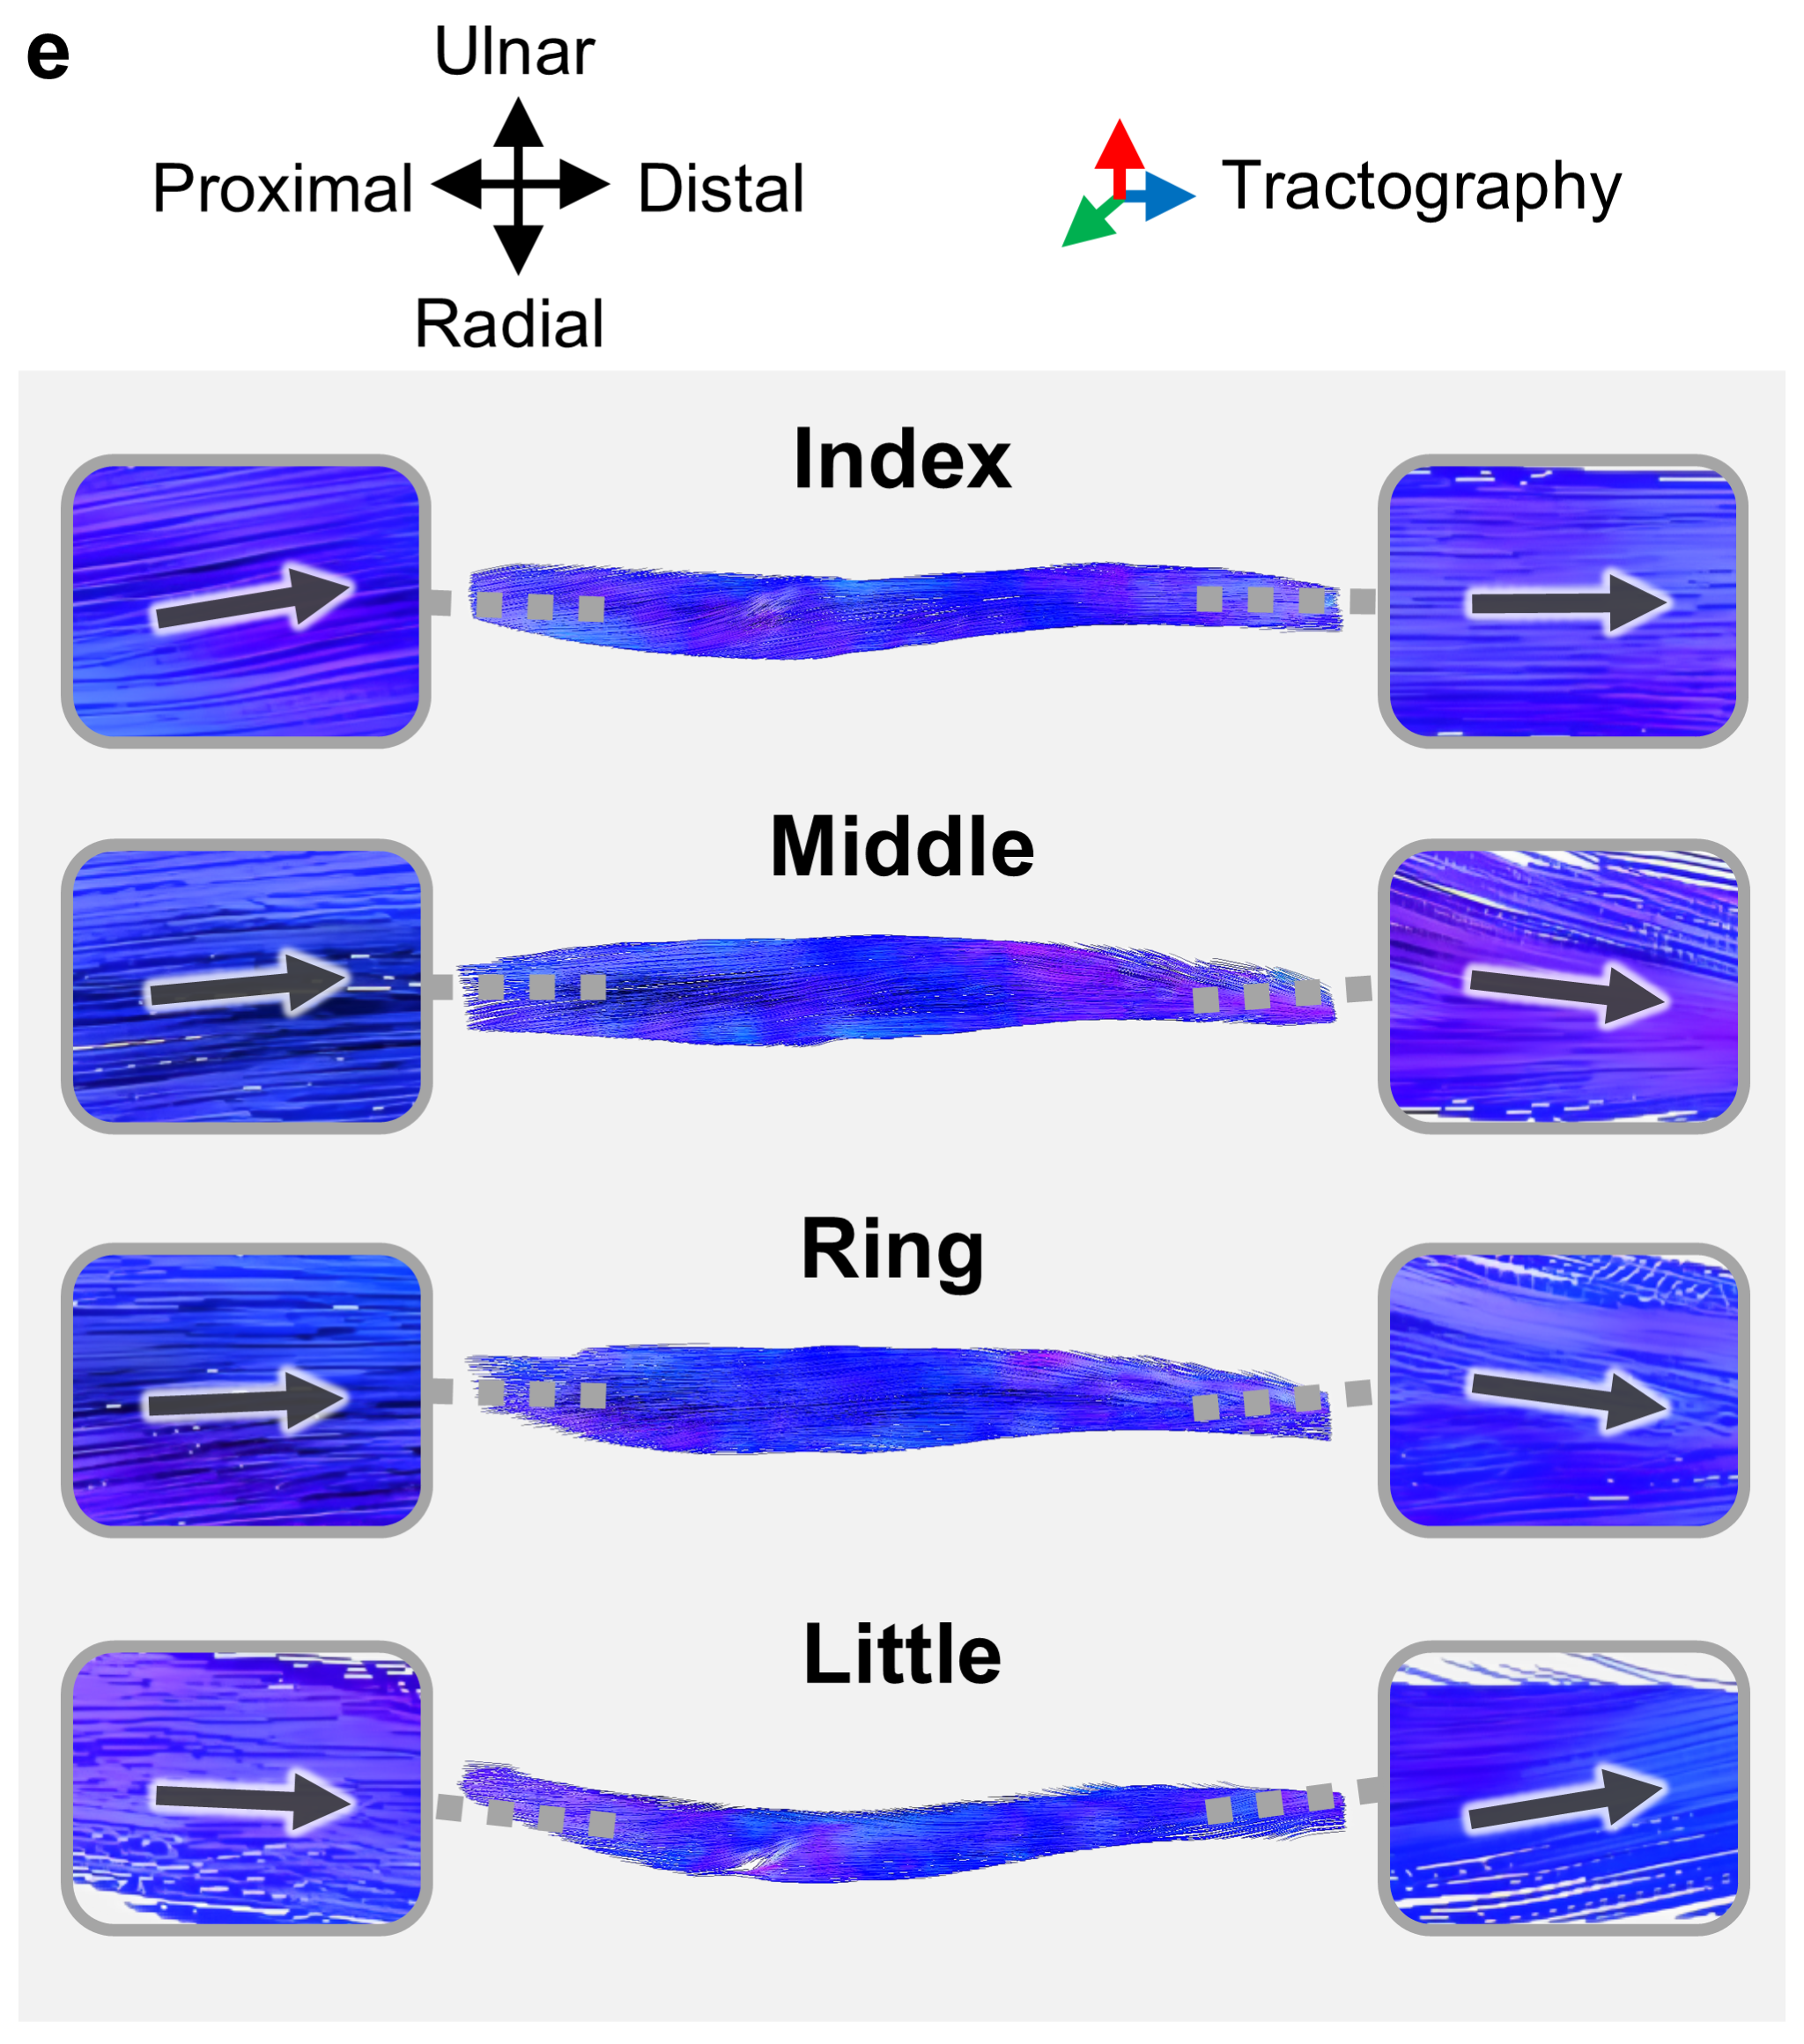

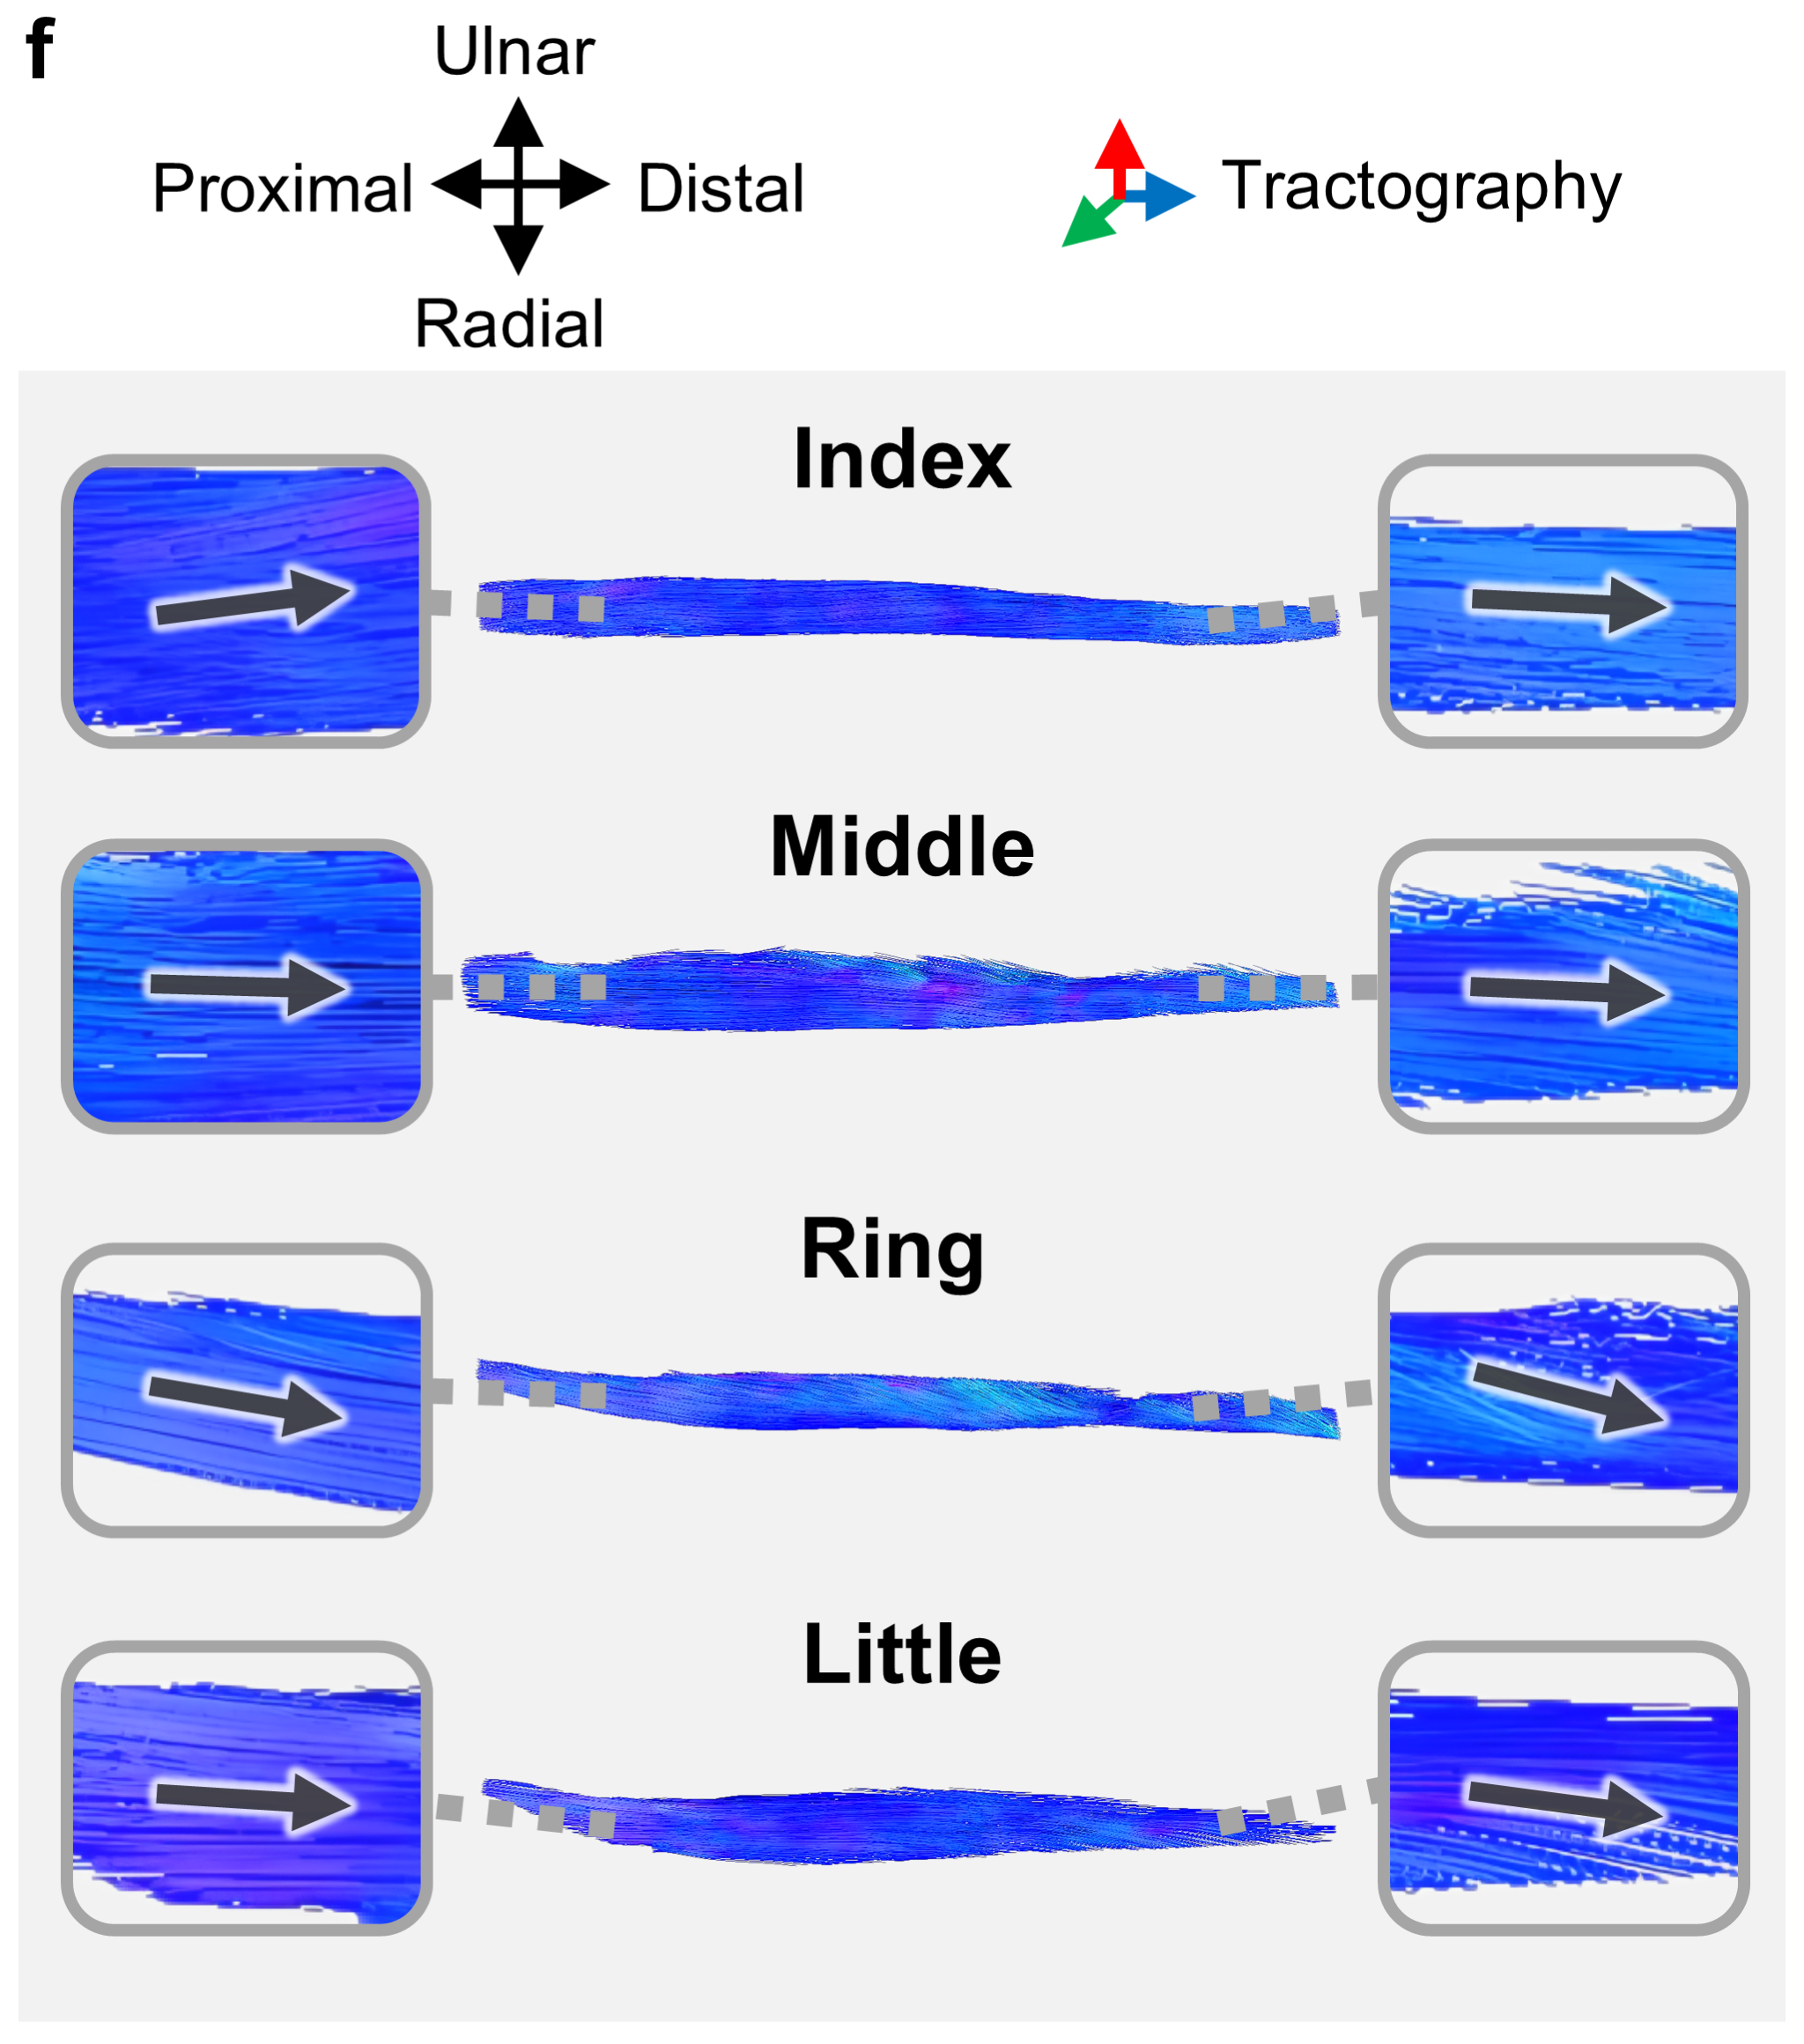


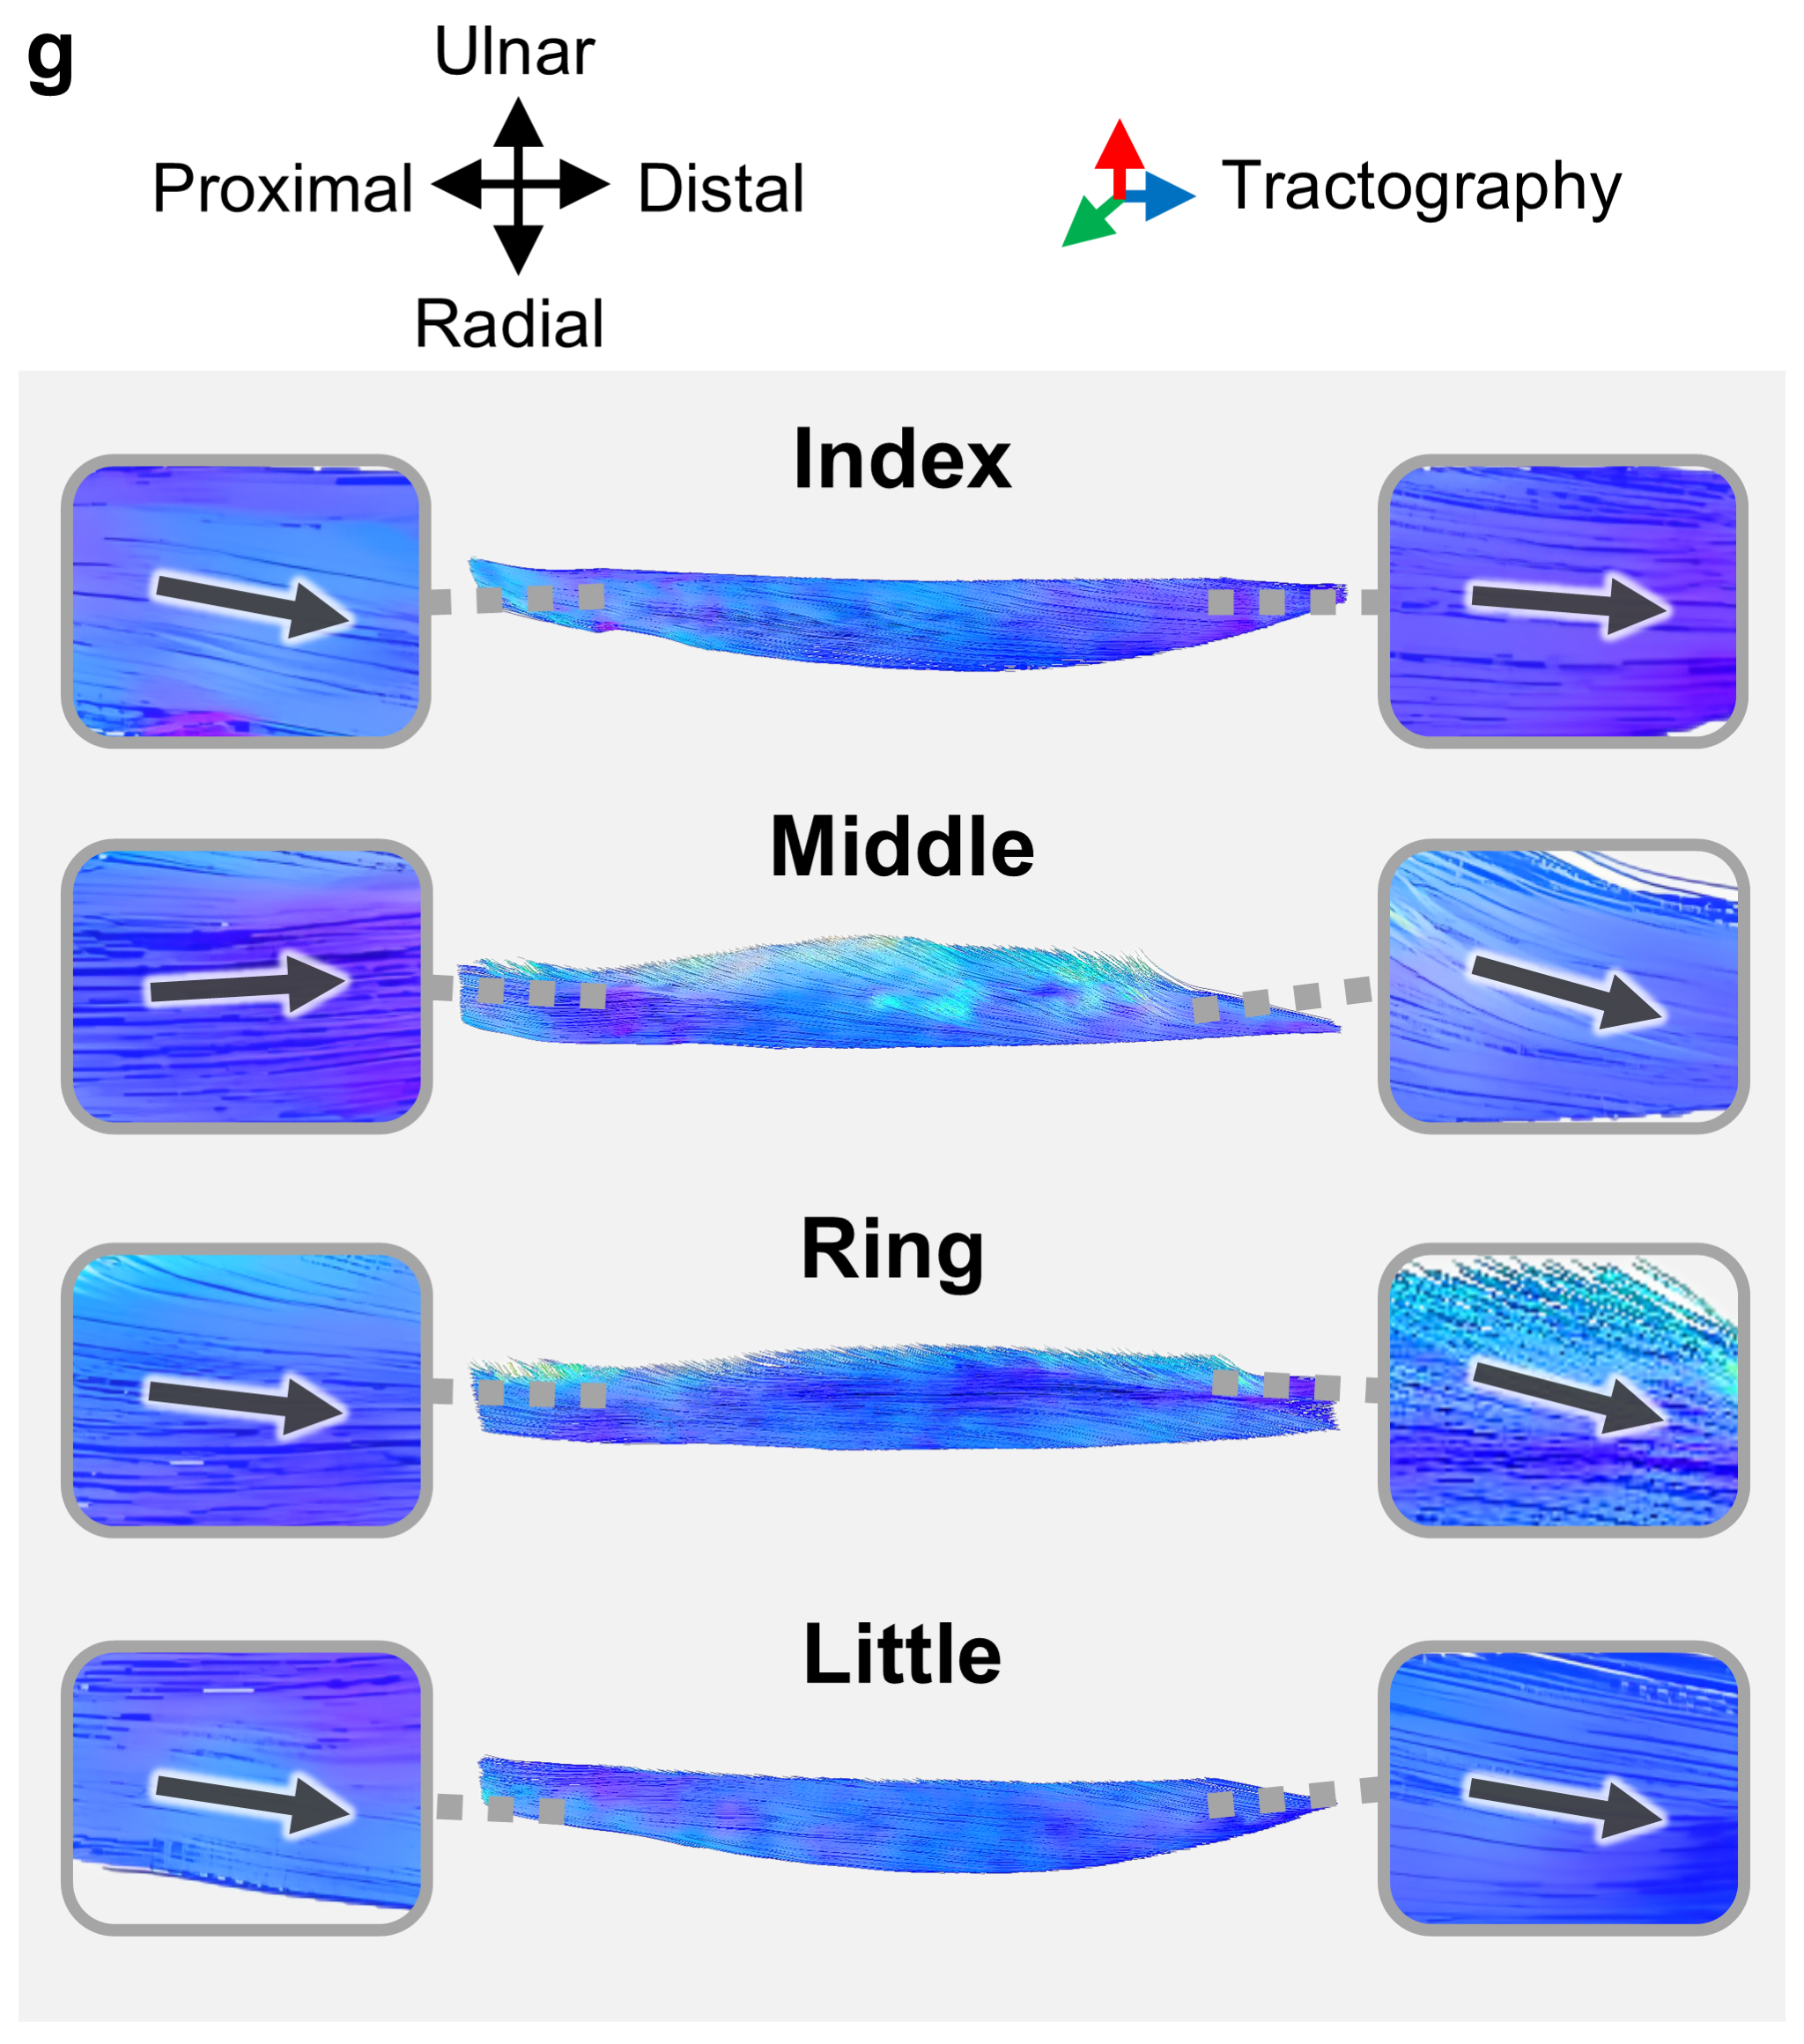

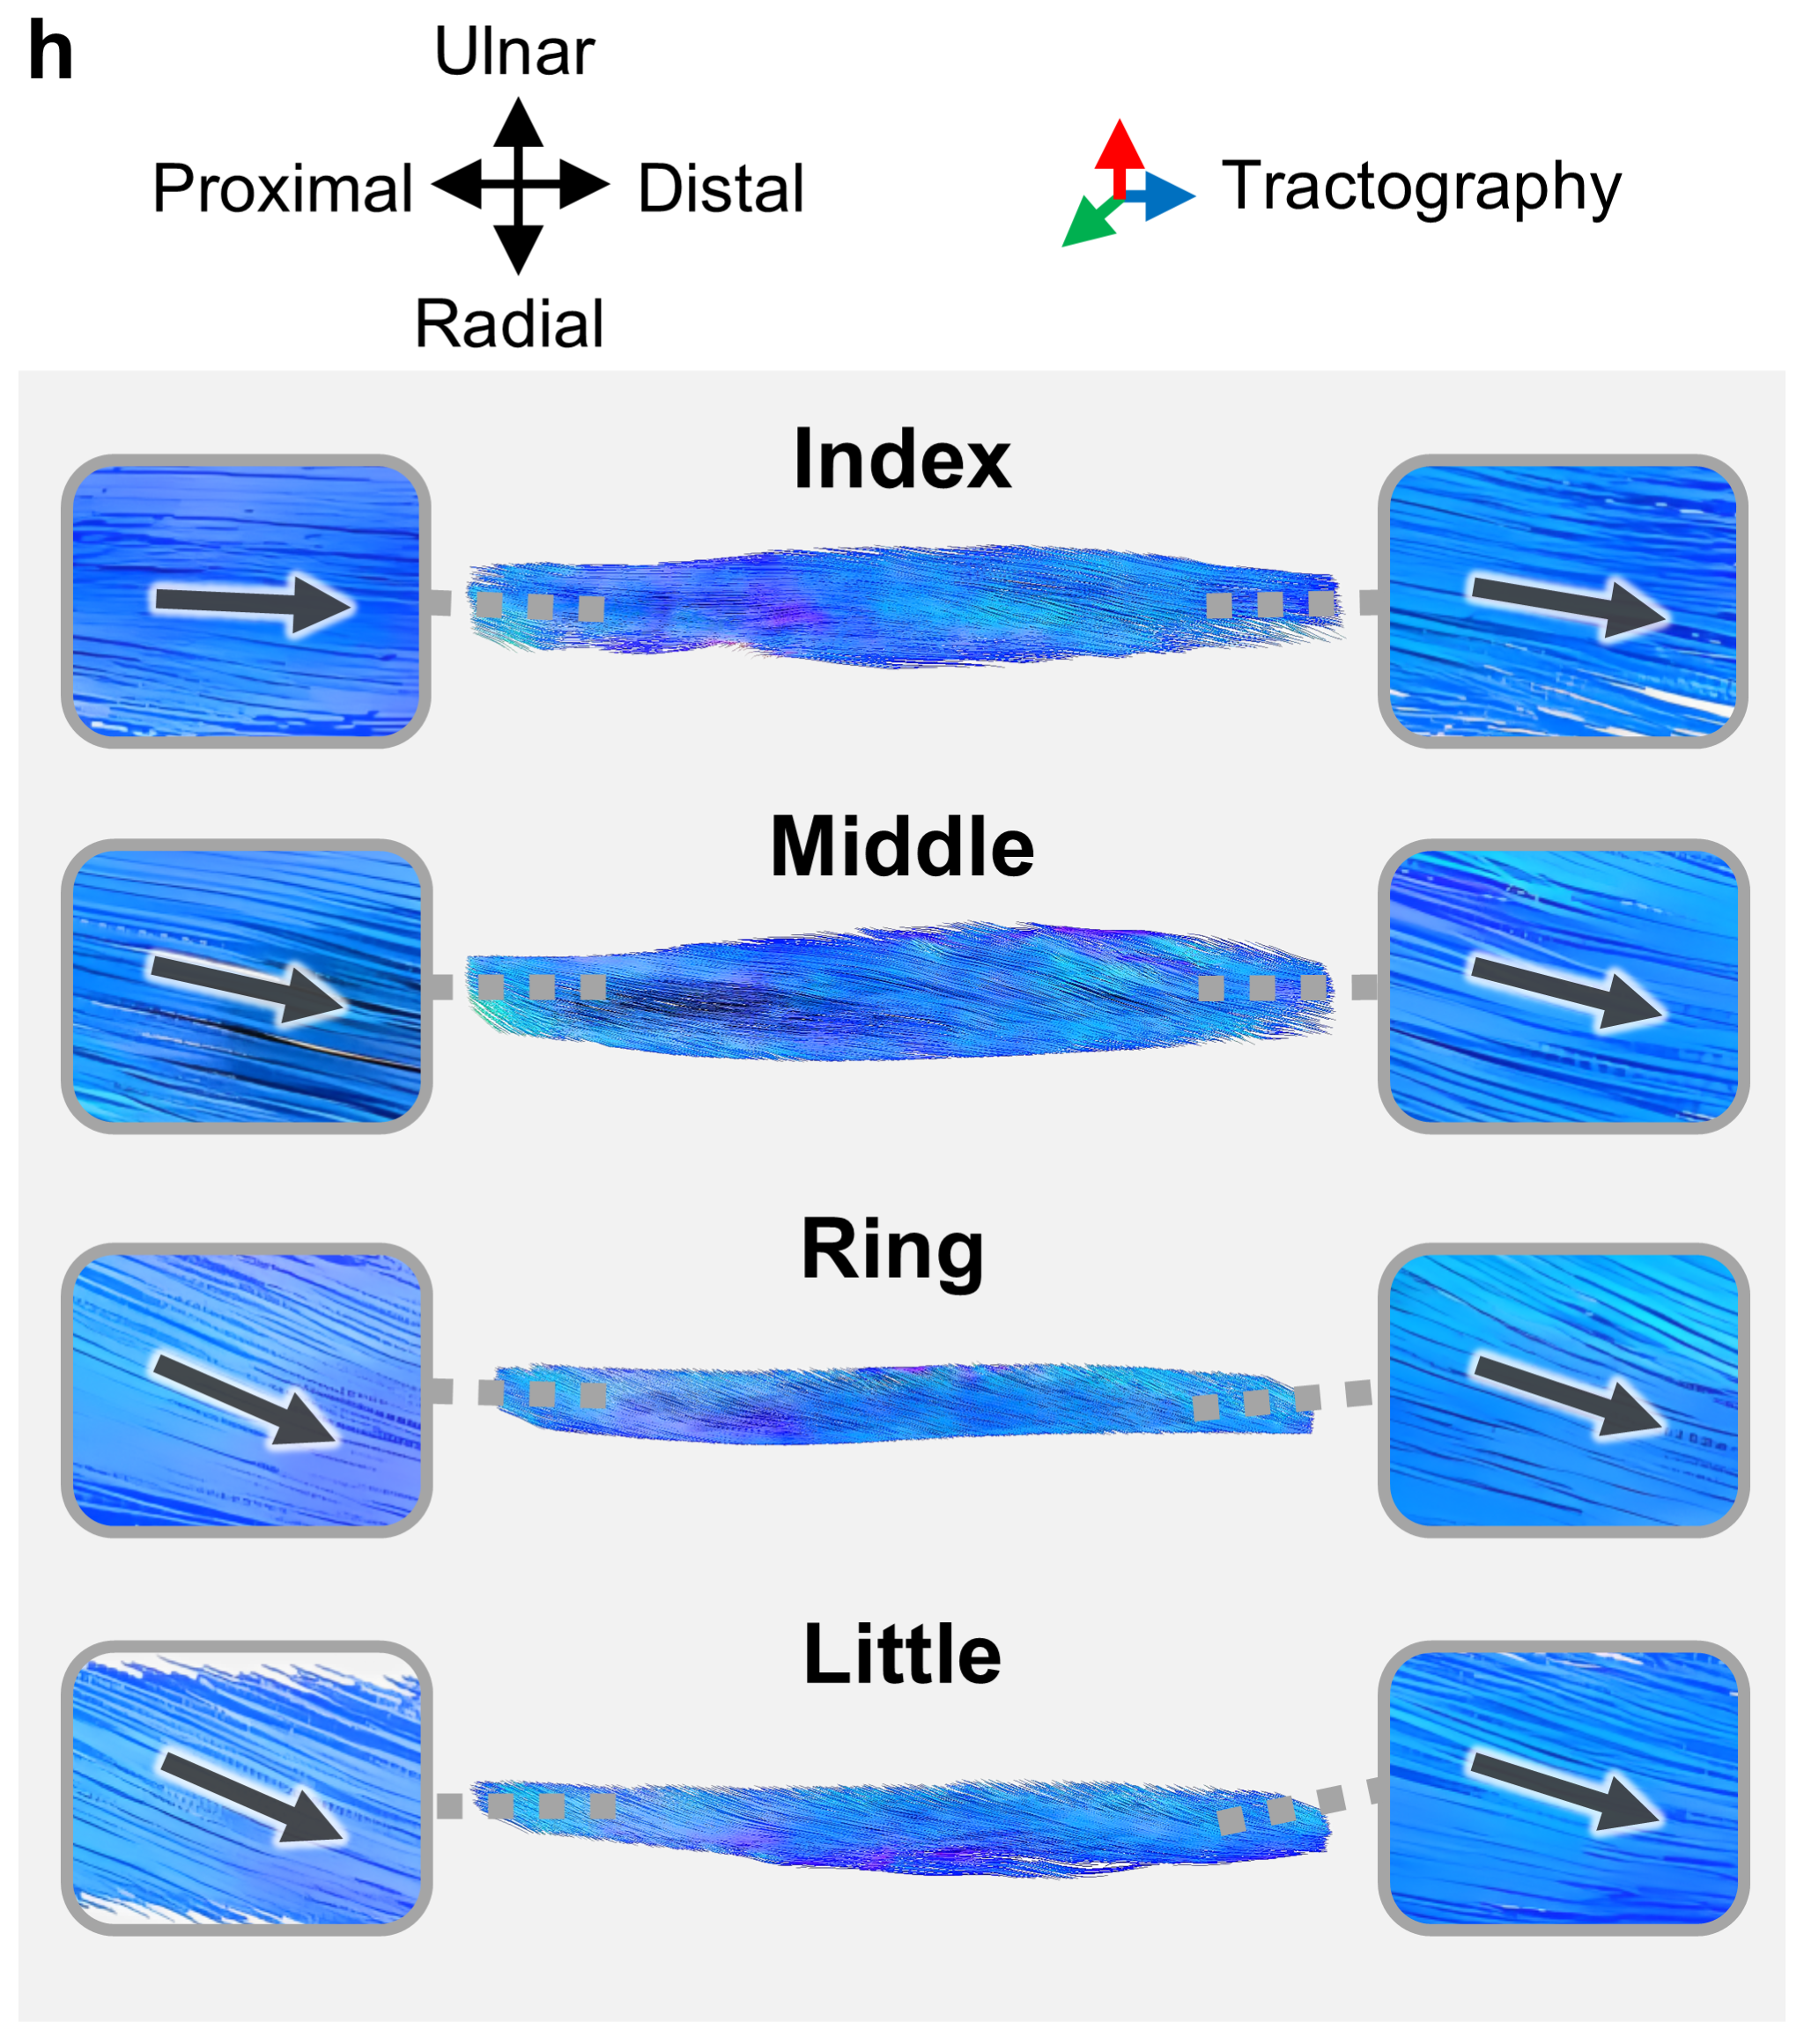


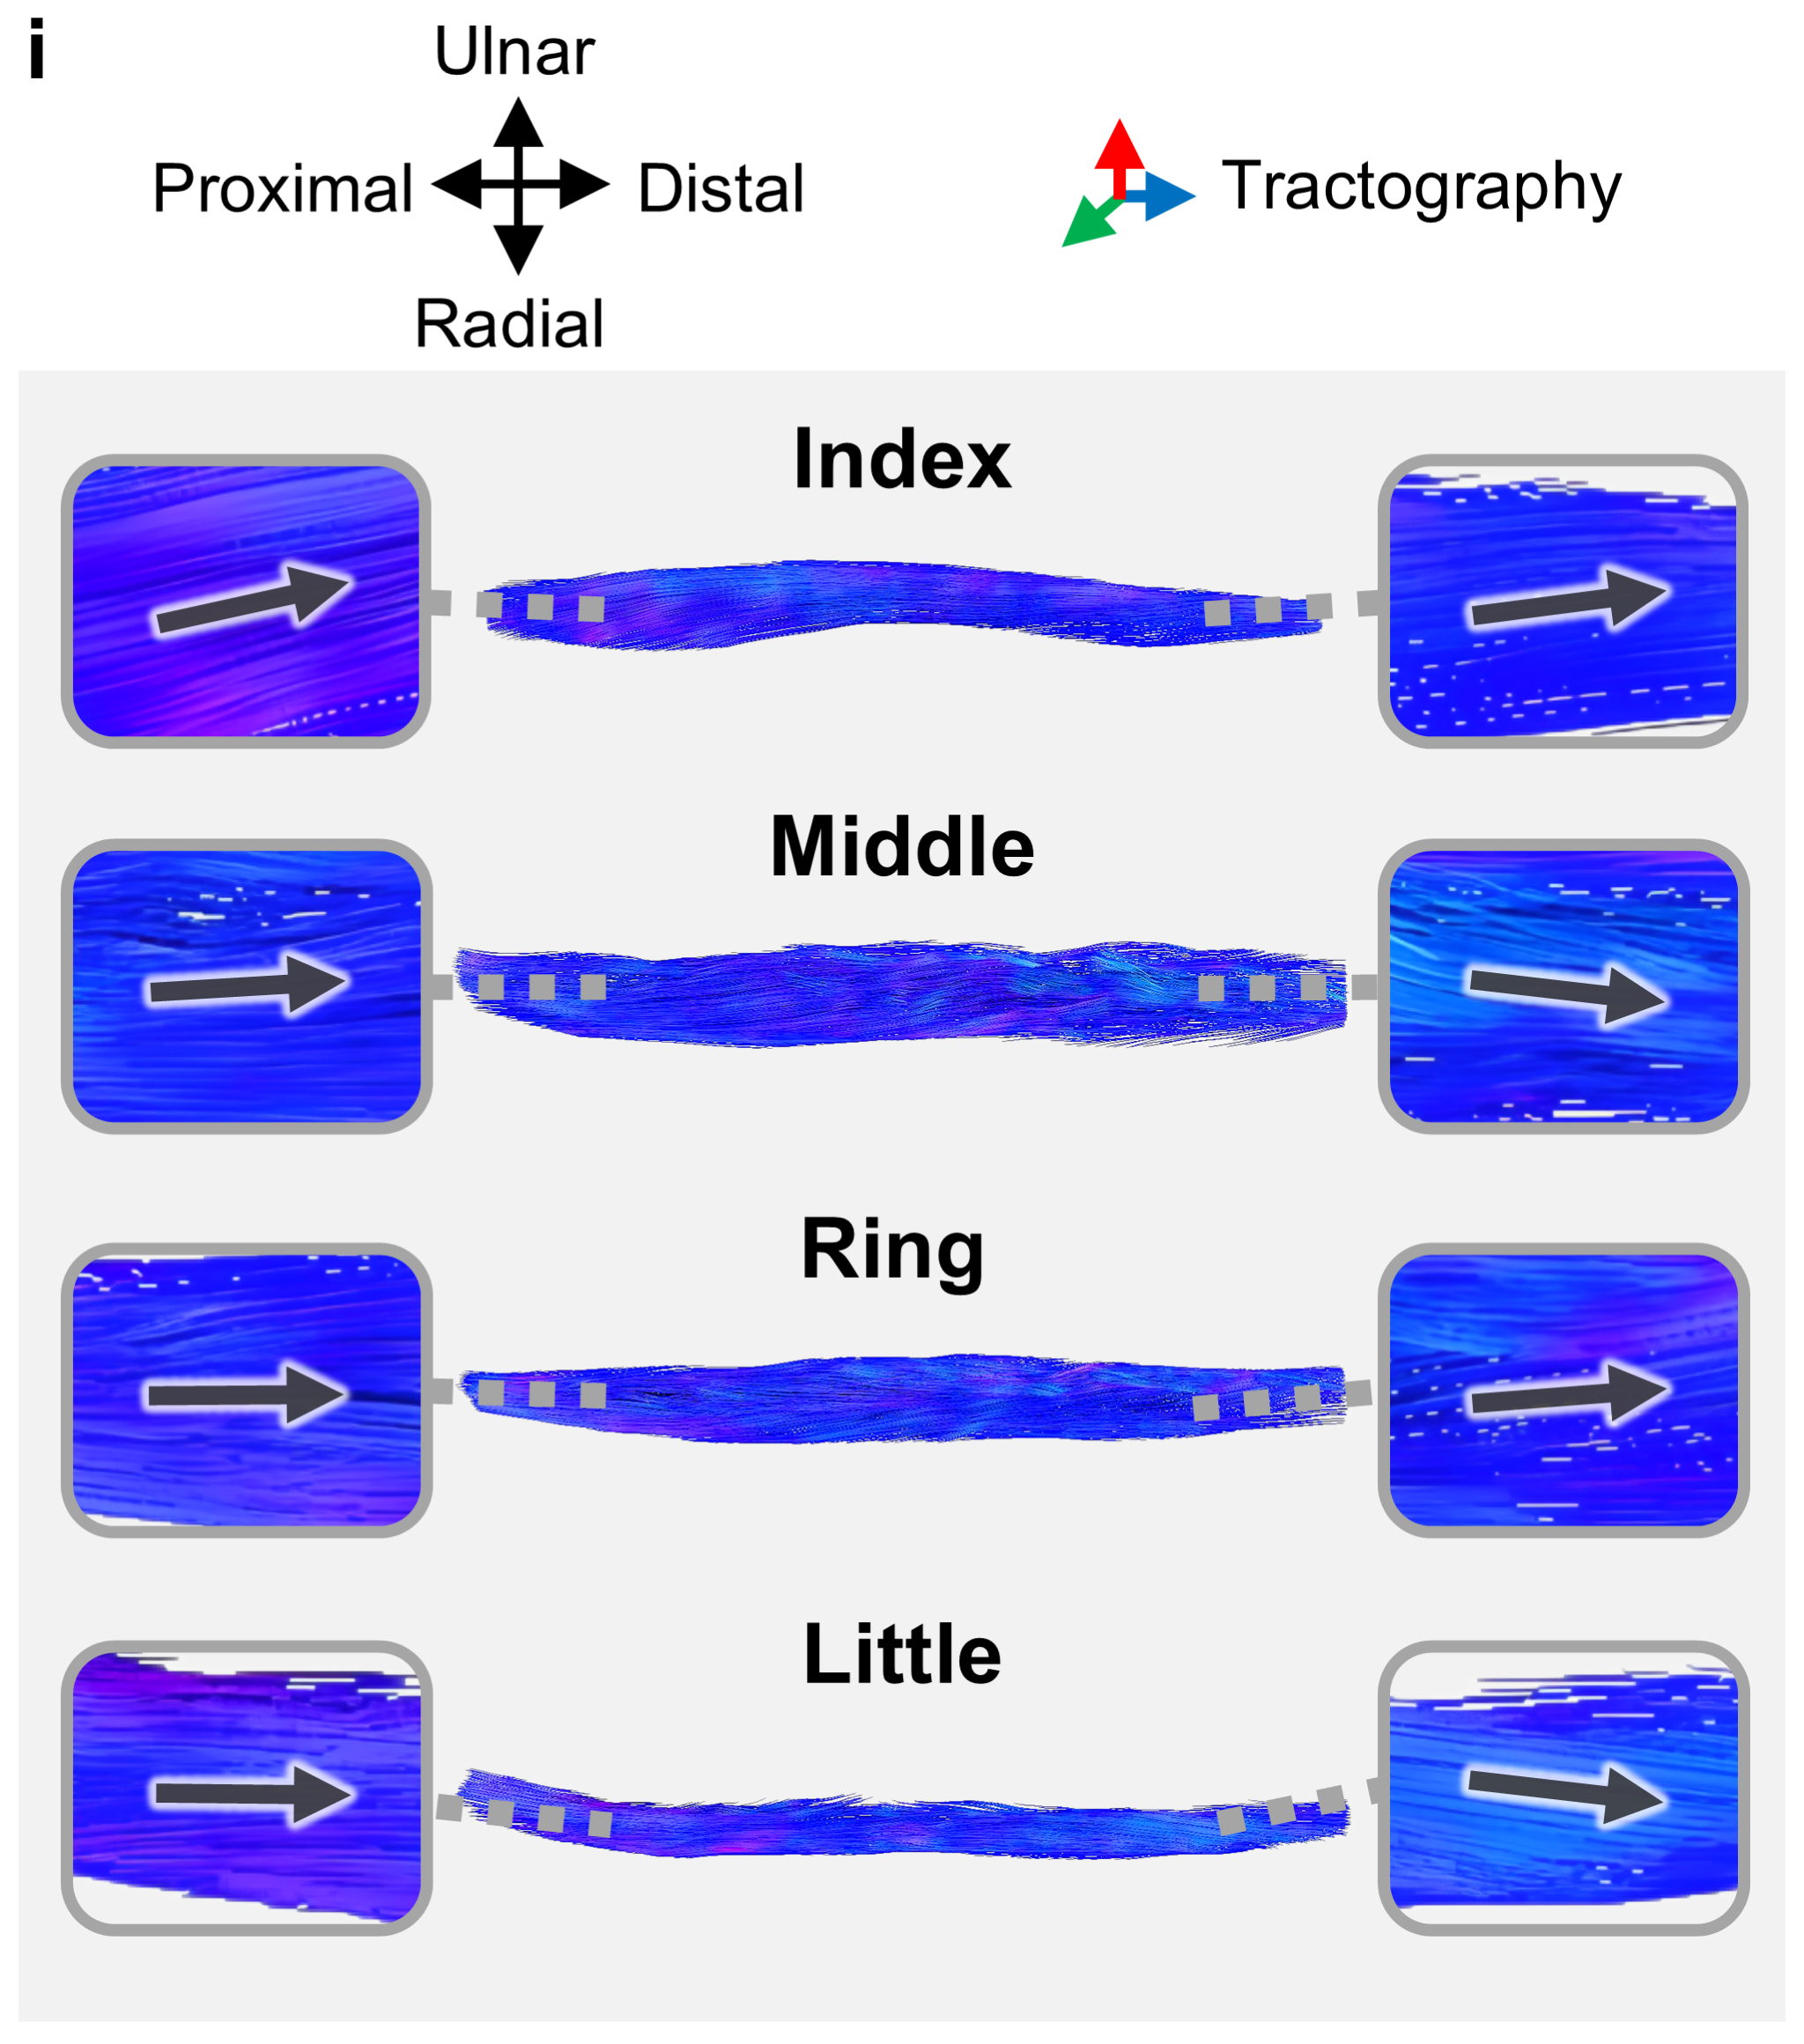

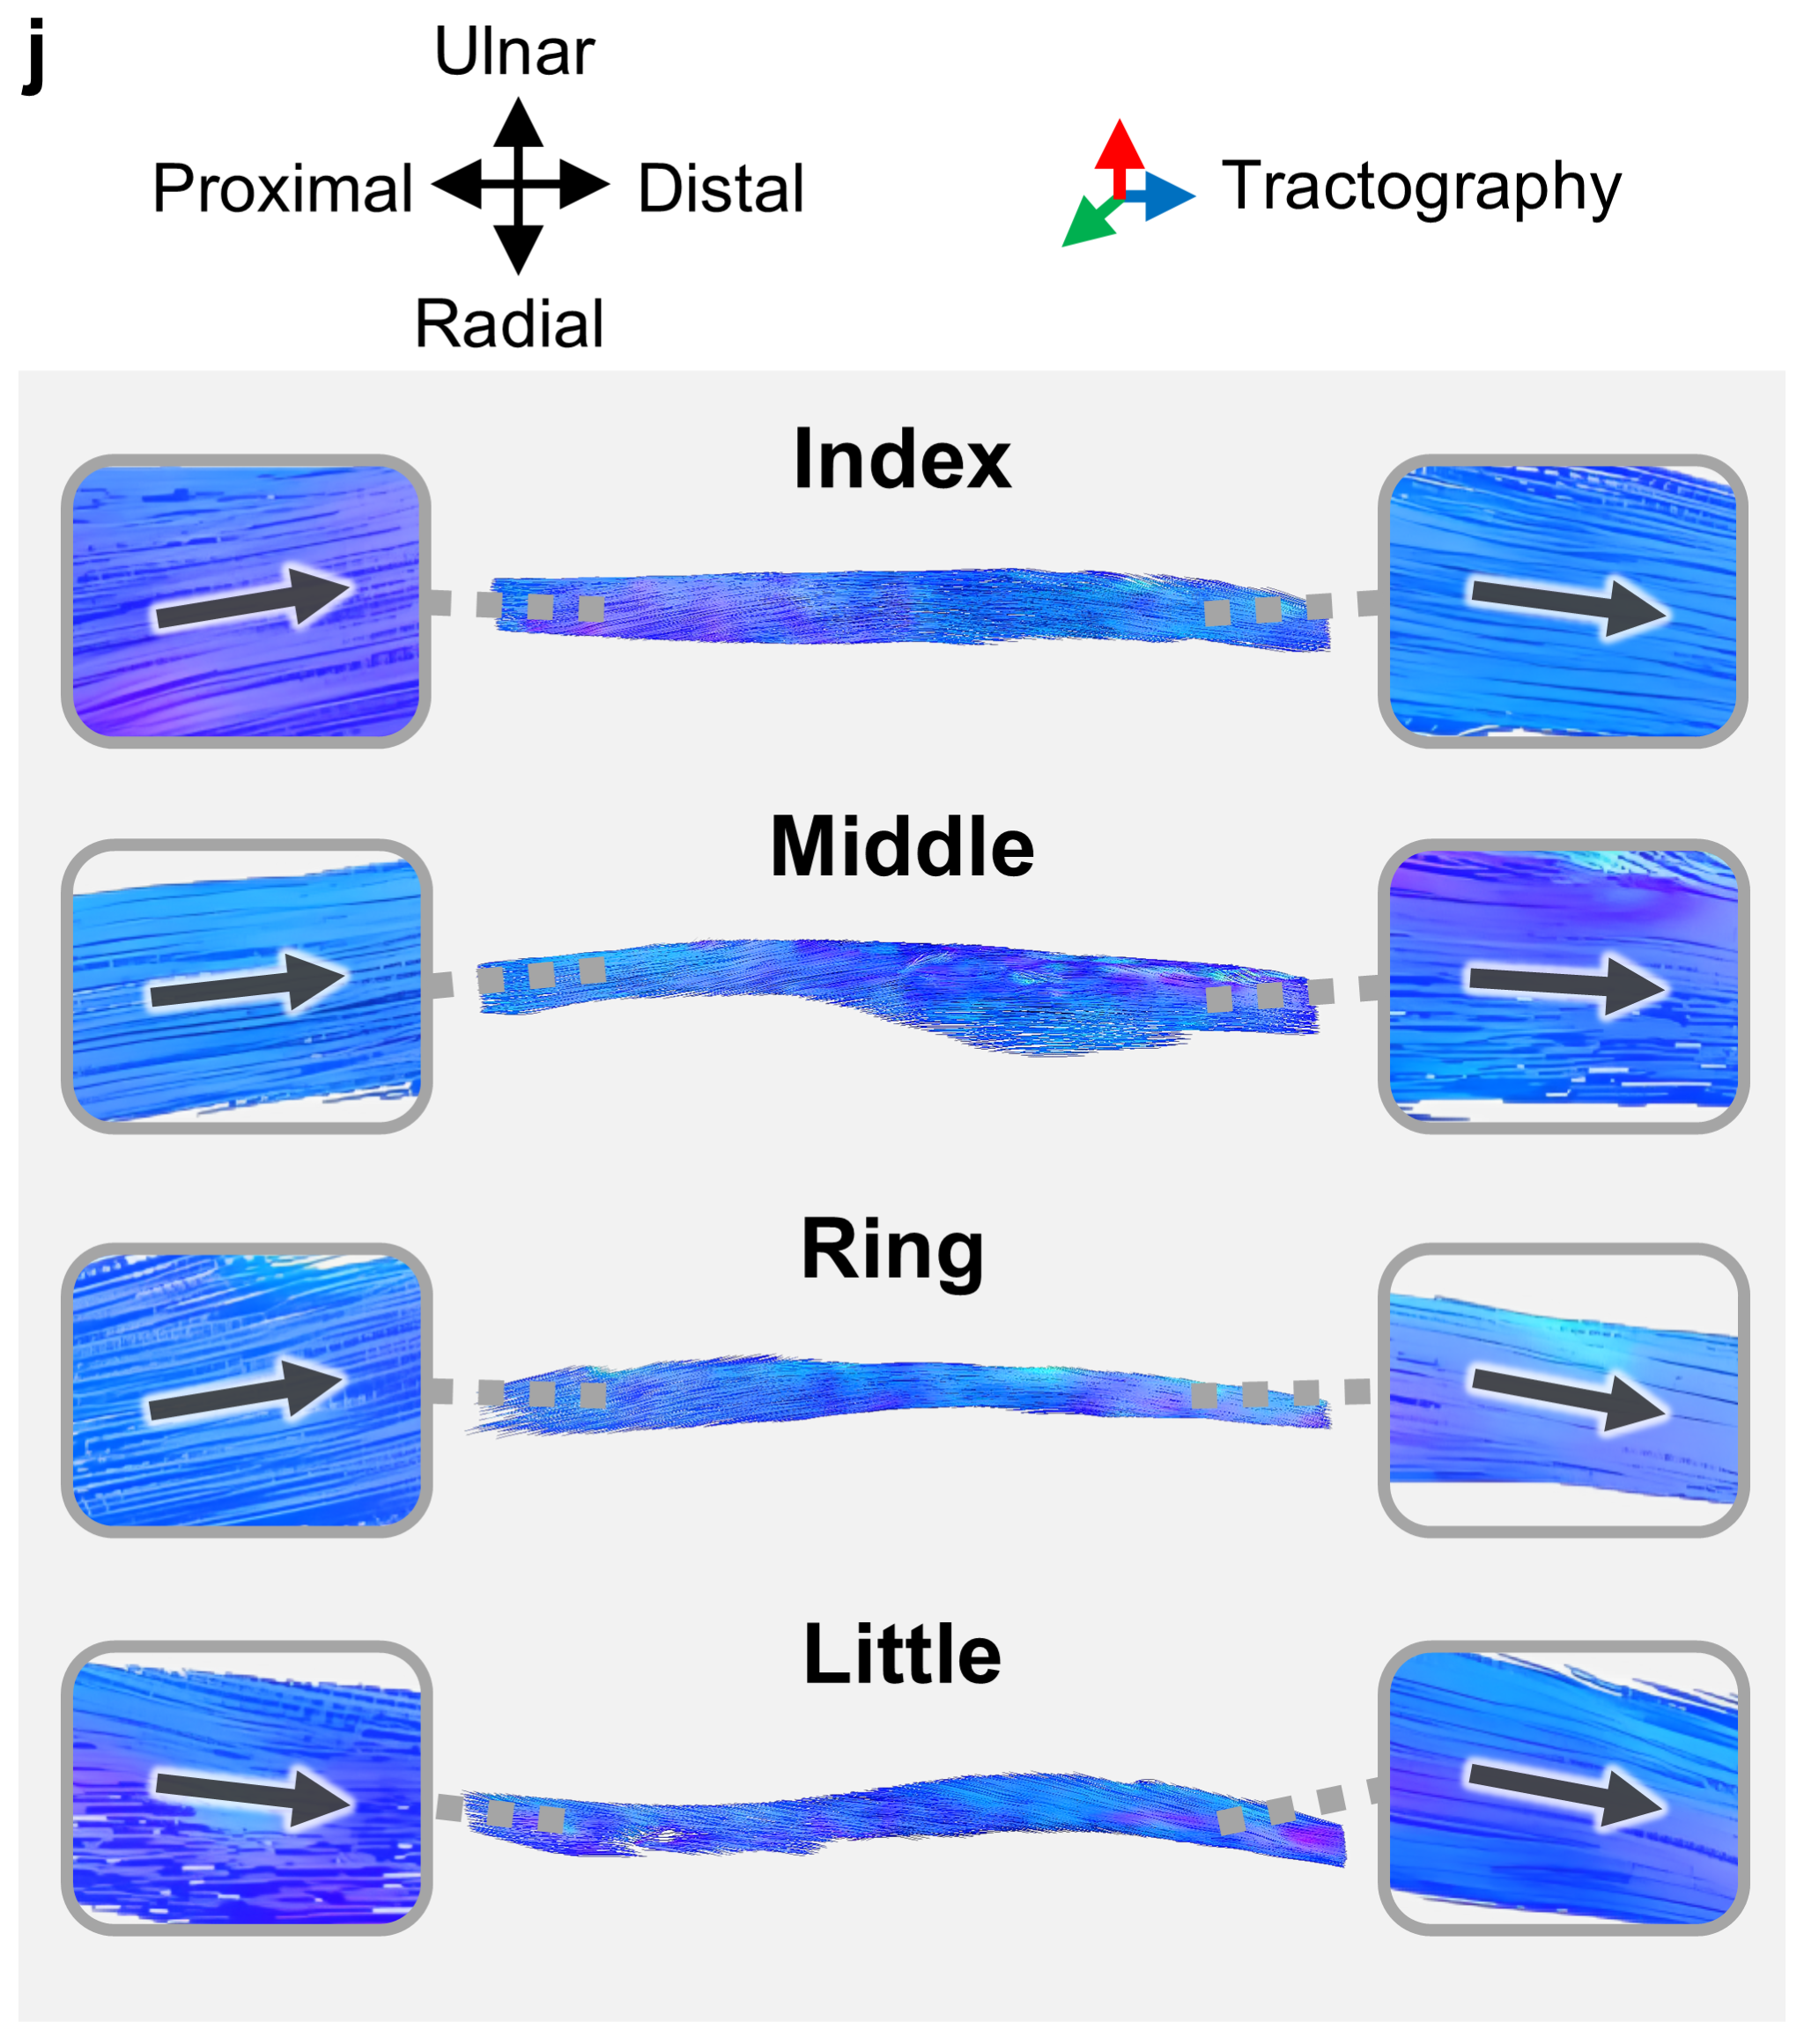


**Supplementary Fig. 10,** **Tractography for the muscle compartments of flexor digitorum superficialis (FDS) in ventral view.** The tractography results of 10 subjects were numbered from **a** to **j**. Direction-encoded tractography was employed. The tractography were scaled at the proximal and distal regions to display local fiber orientation, indicated by arrows, to clearly observe the changes of fiber orientation along the muscle length. It can be observed that the proximal fibers of the little finger had an inclination angle, compared with other compartments, which may result in a shorter fiber length.


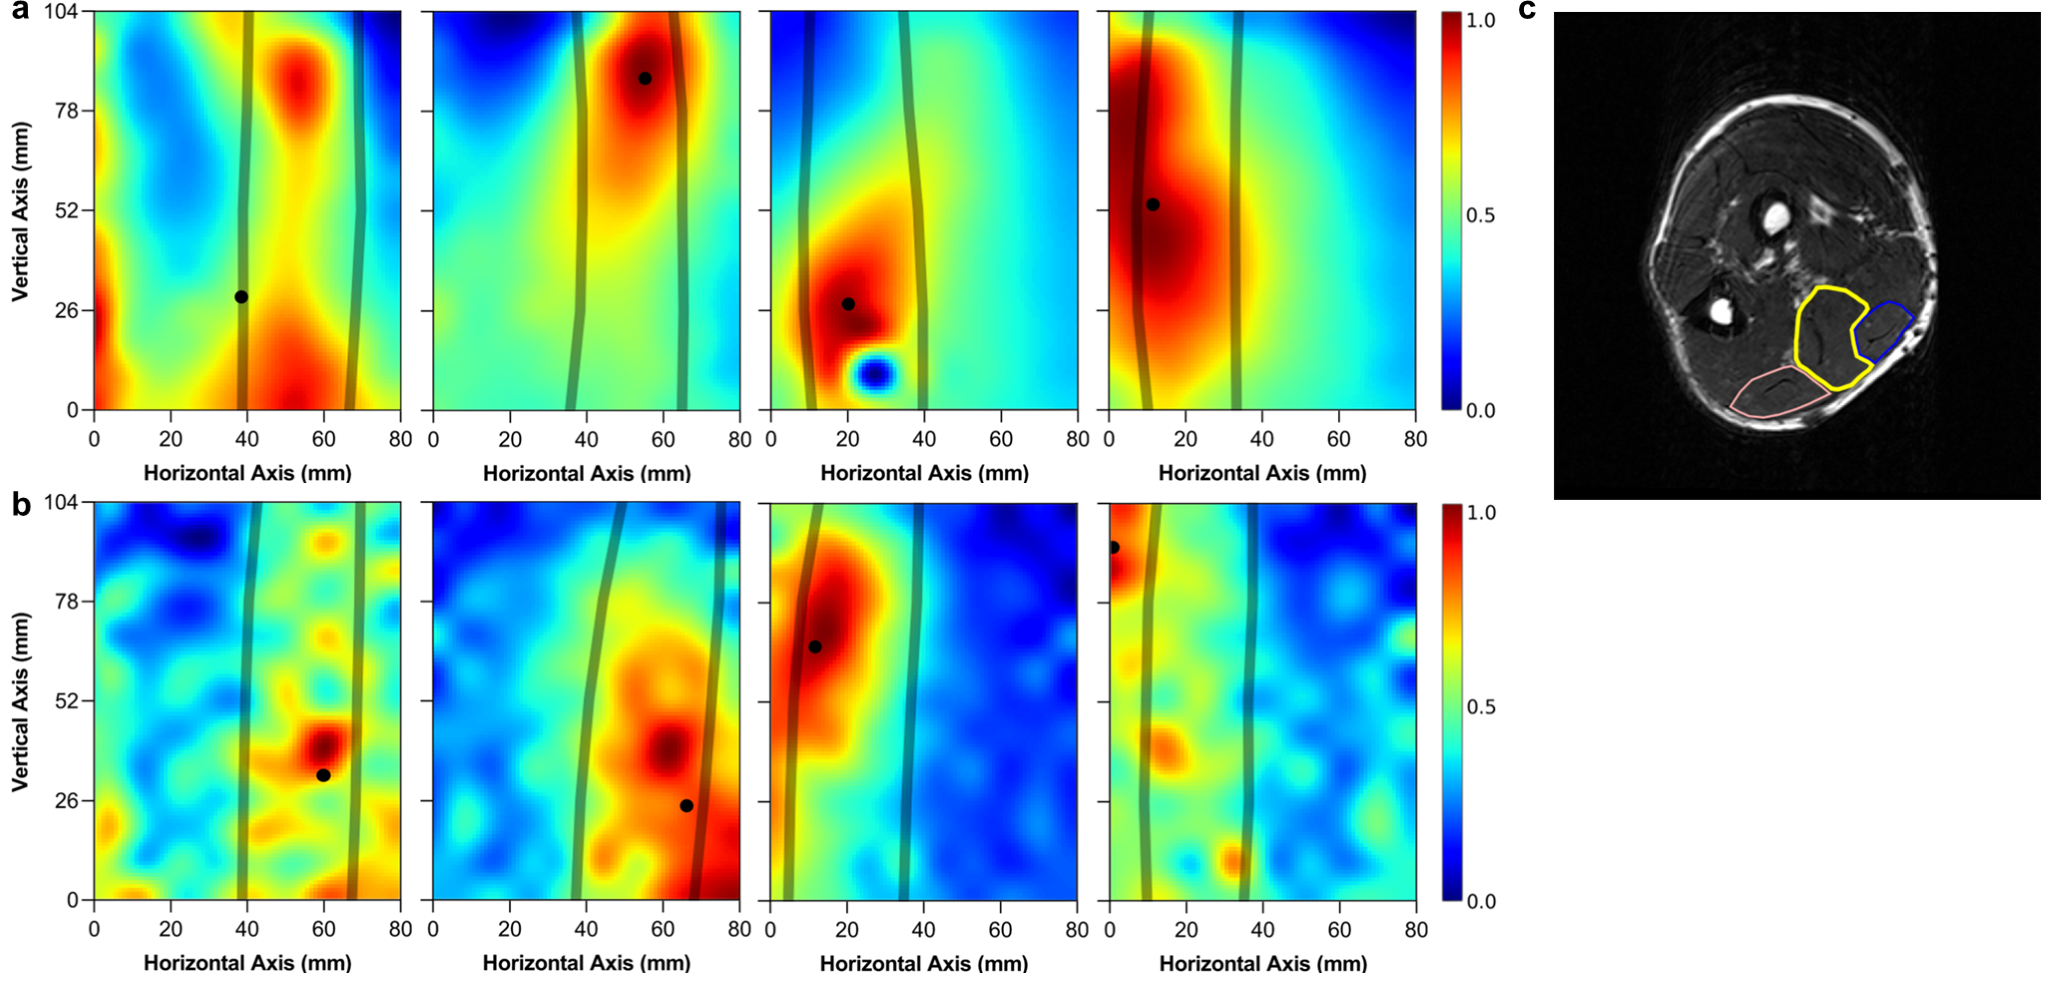


**Supplementary Fig. 11, Muscle activation maps (or normalized RMS heatmaps of electromyogram),** superimposed with electromyogram centers (black dot) and projected boundaries of muscle compartments (black curves), for index, middle, ring and little fingers respectively from two subjects. The first subgraph in **a** indicated that the electromyogram center did not fall within the boundaries for the index finger, while the fourth subgraph in **b** showed that the same error occurred in the little finger. The reason for the error might be the co-contraction of non-target muscles in **c,** MRI image. The wrist flexors on both sides of flexor digitorum superficialis (FDS, yellow contour), including flexor carpi ulnaris (FCU, pink contour) and palmaris longus (PL, blue contour), may be activated. The activation of FCU may lead to the error and the left red area inthe first subgraph of **a** and the fourth subgraph of **b**. The activation of PL may lead to the right red area inthe subgraphs 1 and 2 of **b**.


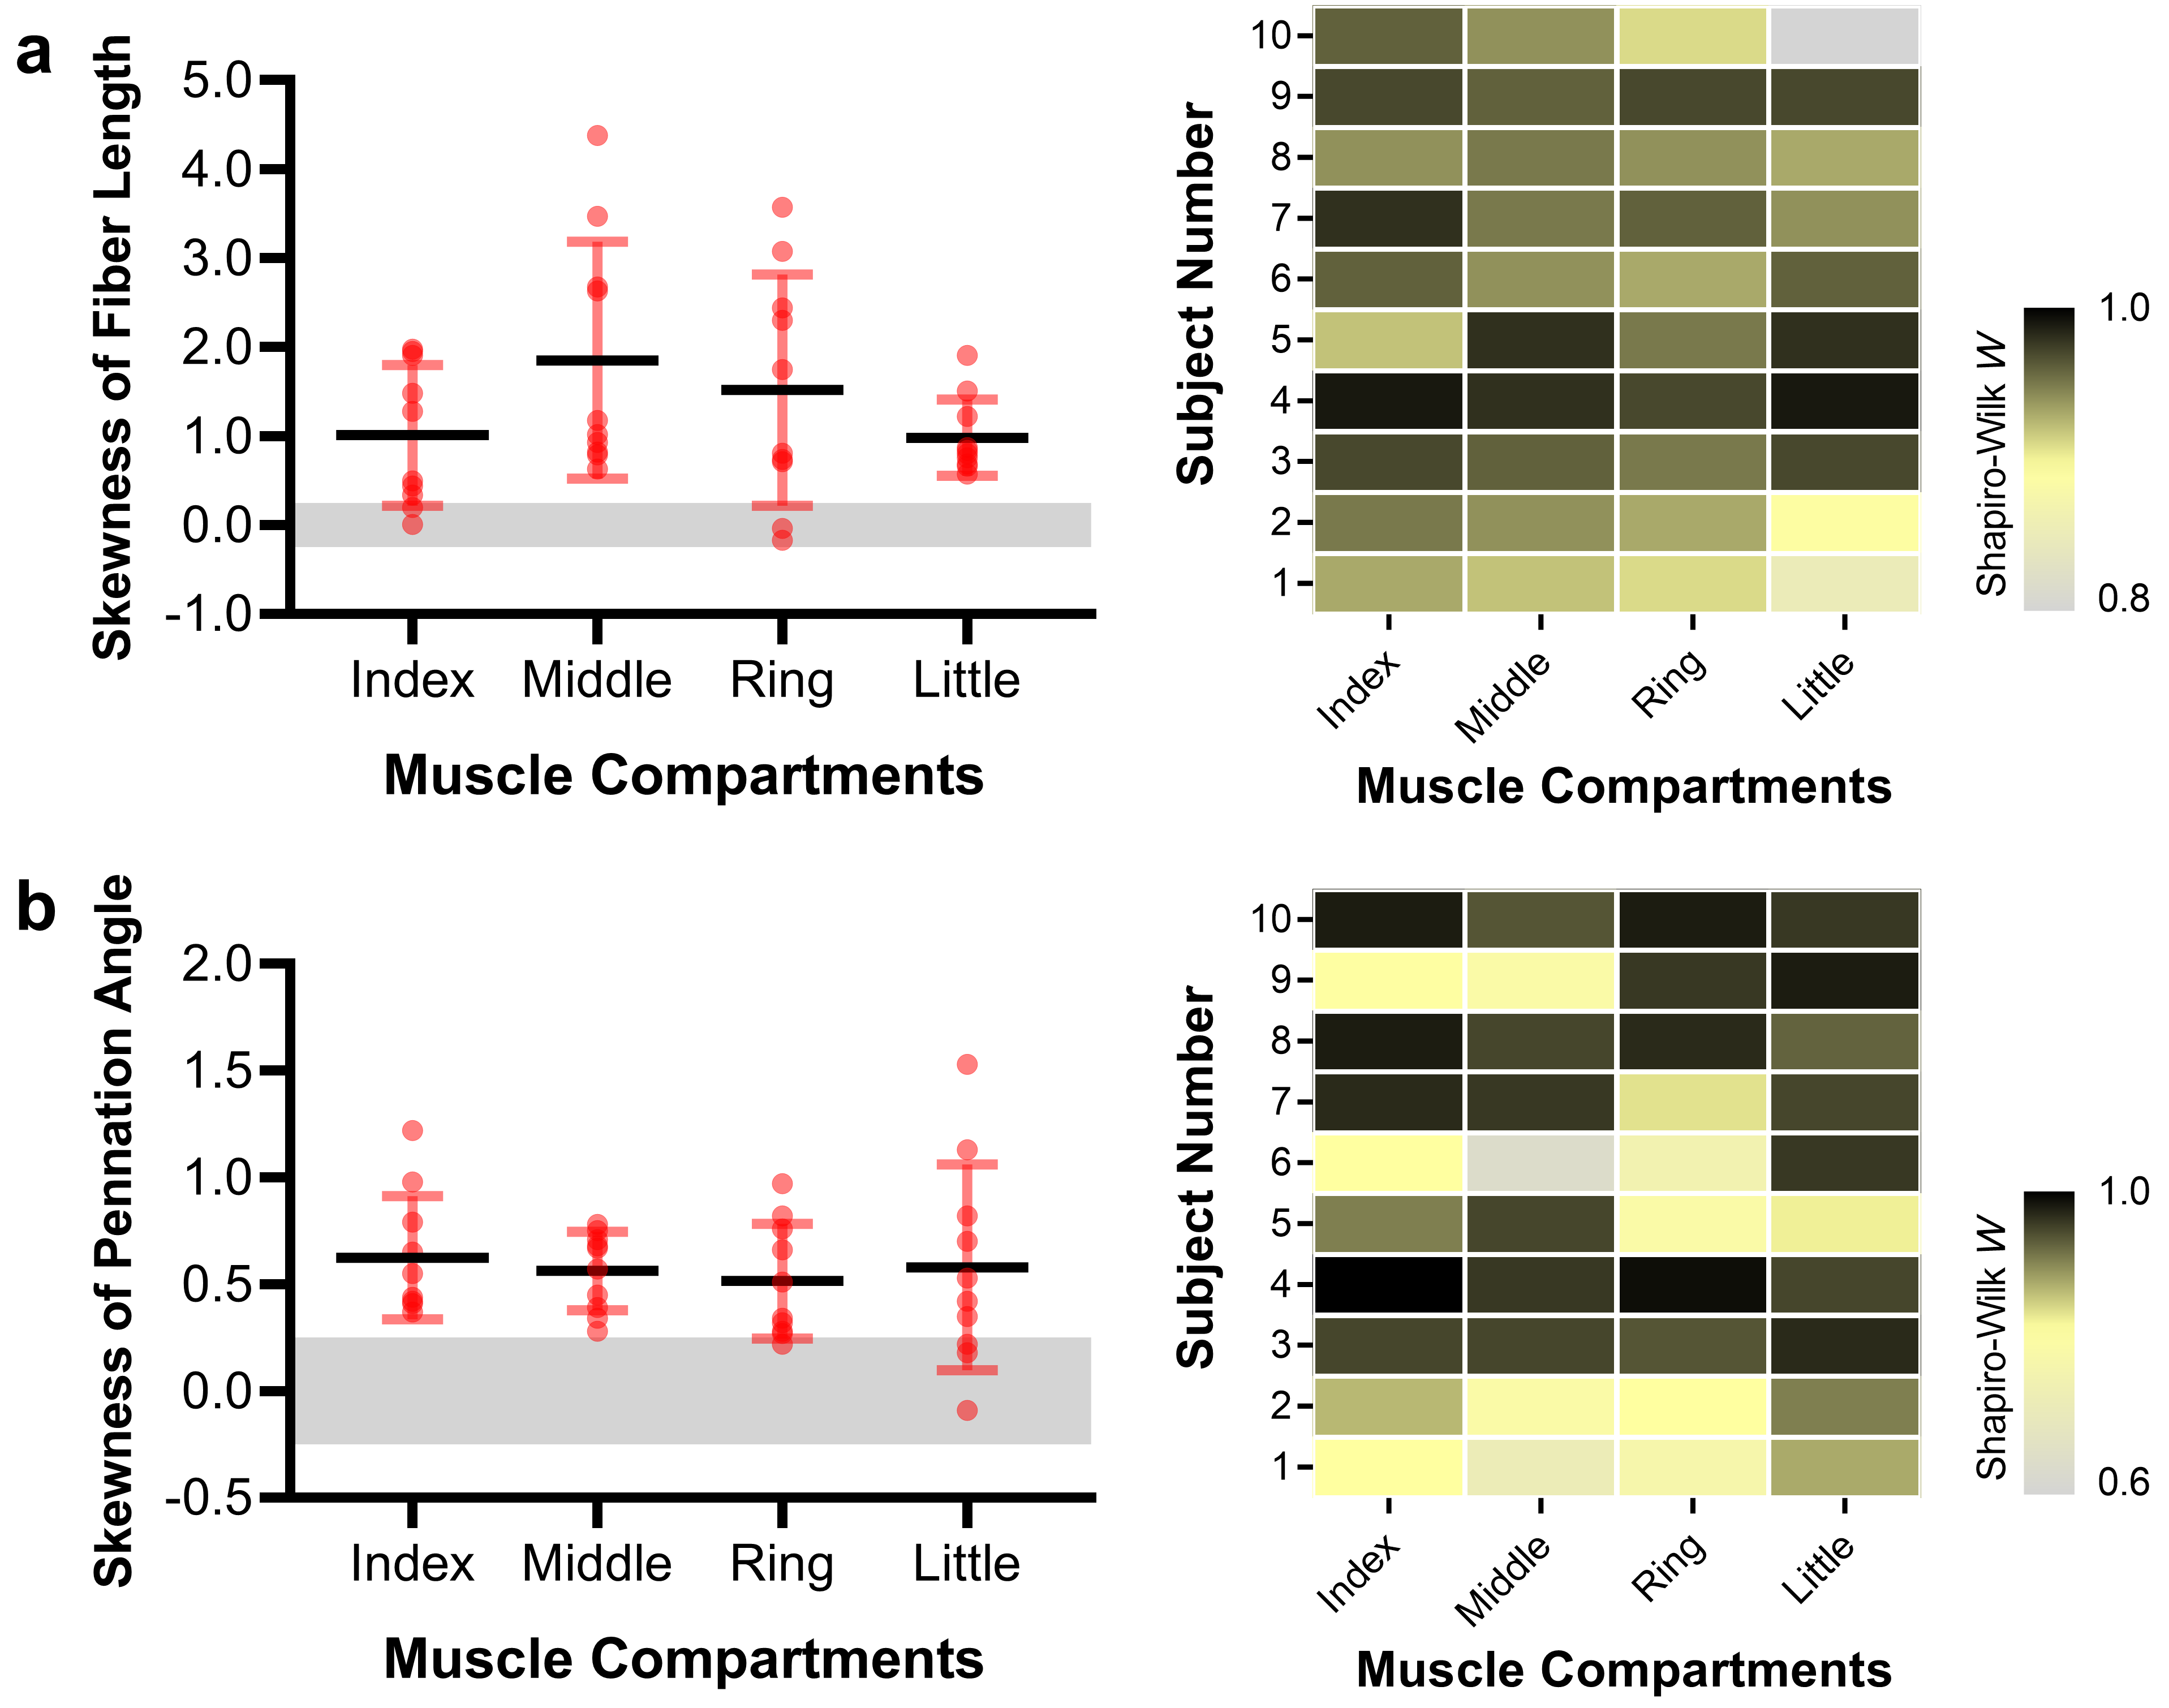


**Supplementary Fig. 12, Statistical appropriateness of a, fiber length and b, pennation angle.** The skewness and the *W* value of Shapiro-Wilk test for each muscle compartment in subjects indicated that both architectural properties violated the normality test and were mainly distributed in a positive-skewed distribution.


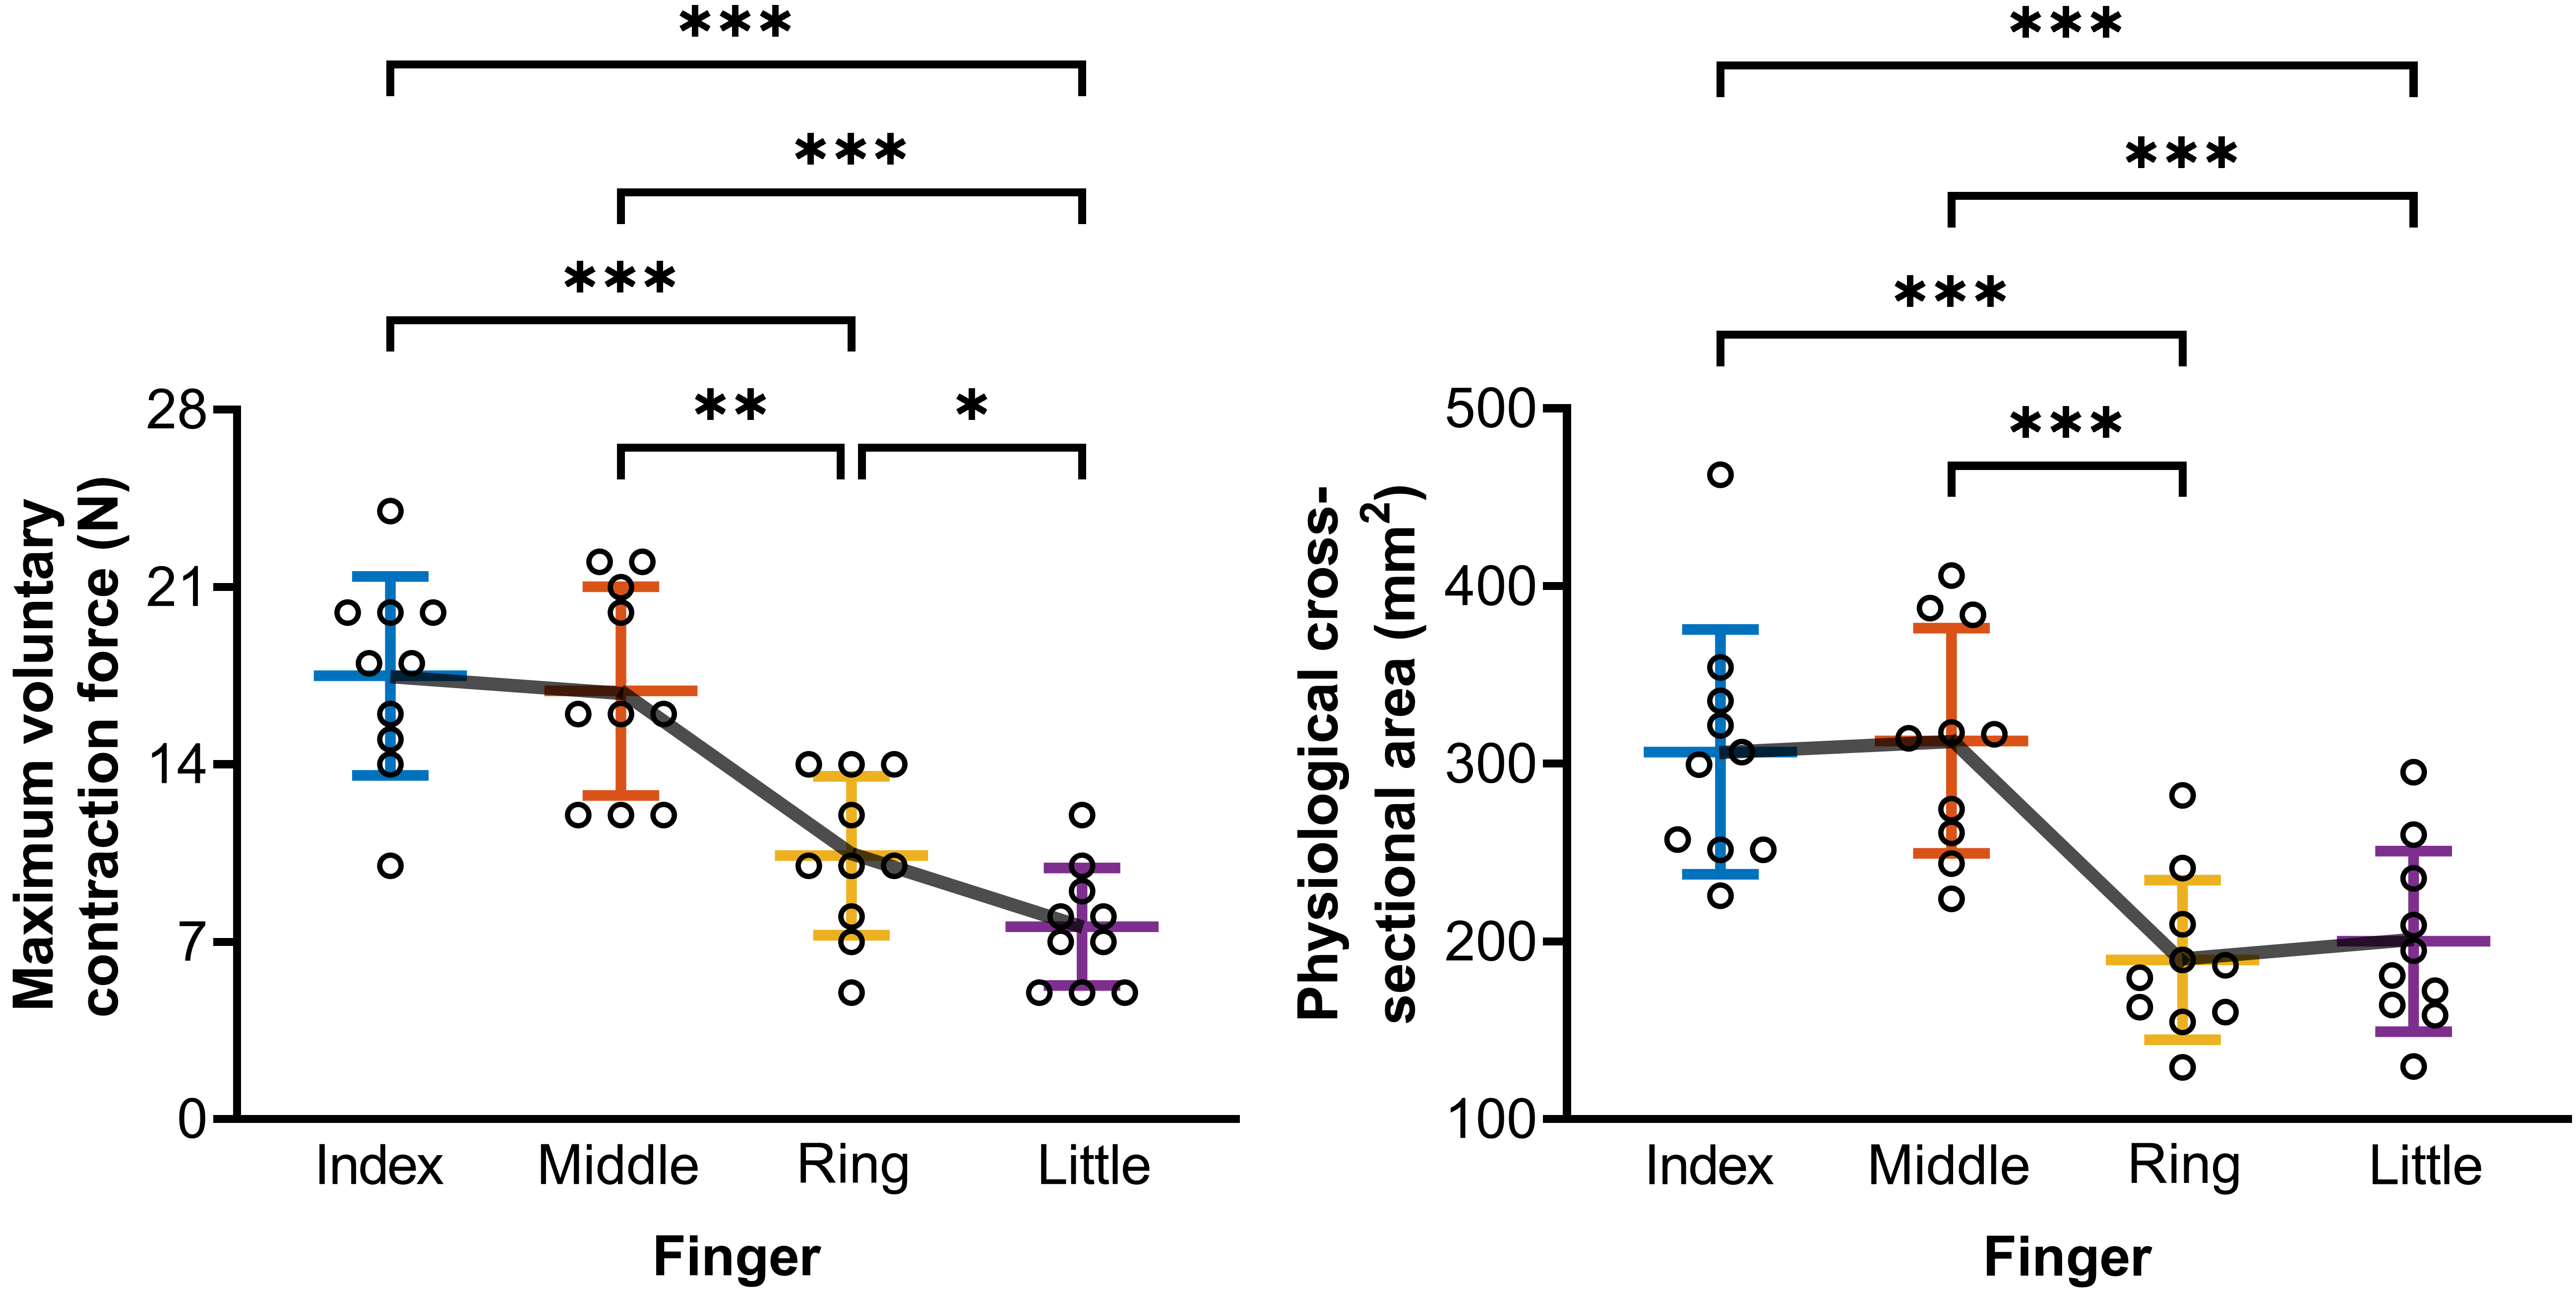


**Supplementary Fig. 13, Maximum voluntary contraction (MVC) force and physiological cross-sectional area (PCSA) of the fingers for 10 subjects**. The MVC force was measured using a force gauge in **Supplementary Fig. 4**. The index and middle fingers have greater strength, while the ring and little fingers have less strength. Within each group, the differences in strength are small and statistically insignificant, except for the difference in MVC between the ring and little fingers, which reaches significance. In terms of finger strength, the rankings from the MVC and the PCSA are similar, and the groups resulting from both are exactly the same. It is usually noted that PCSA is directly proportional to the maximum isometric force, which is one of the factors that affect the MVC force. MVC force (N): index 18 ± 4, middle 17 ± 4, ring 10 ± 3, little 8 ± 2. PCSA (mm2): index 310 ± 70, middle 320 ± 60, ring 190 ± 40, little 200 ± 50.


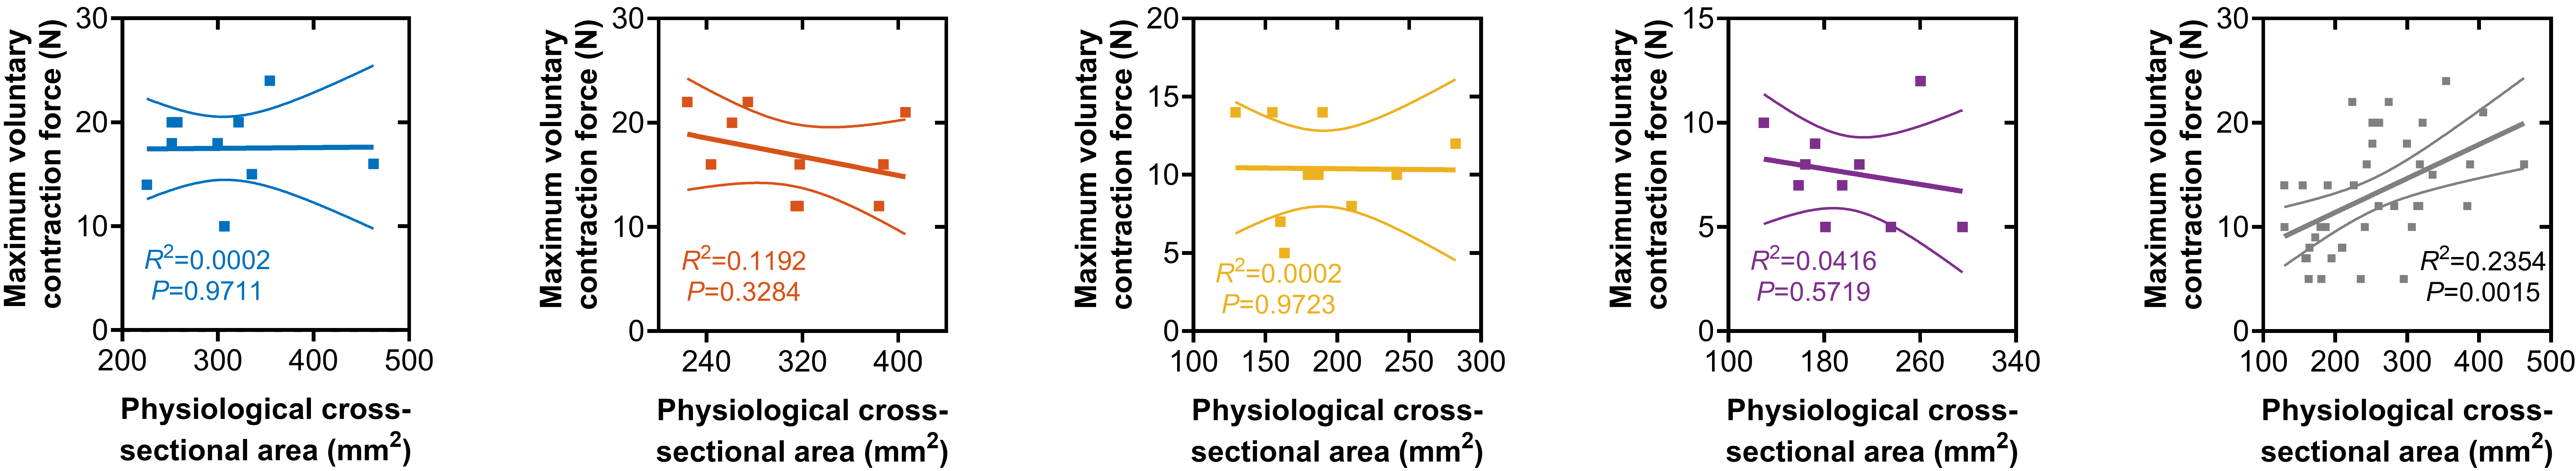
**Supplementary Fig. 14,** **The linear regression results of maximum voluntary contraction (MVC) force and physiological cross-sectional area (PCSA) of the fingers for 10 subjects.** For each individual finger, including the index, middle, ring and little from left to right, the linear regression was not significant. For the data of all fingers (the last subplot), the MVC force and the PCSA have a weak linear relationship. It is usually noted that PCSA is directly proportional to the maximum isometric force, which is one of the factors that affect the MVC force.


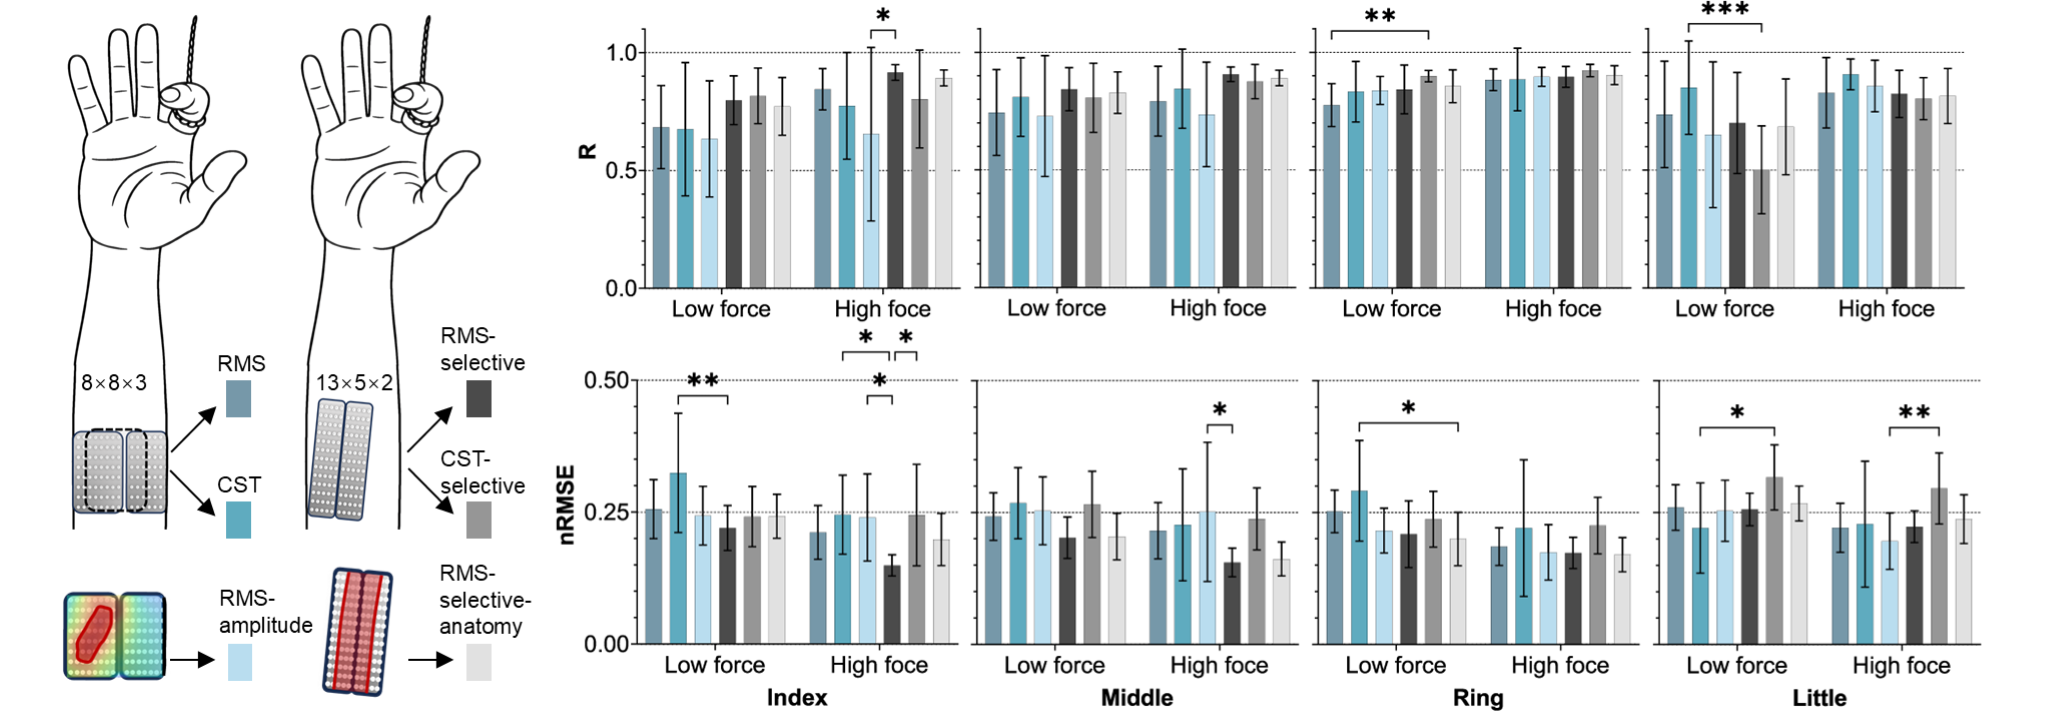


**Supplementary Fig. 15, Analysis of variance (ANOVA) of individual-finger force estimation.** Finger force output was modeled using two EMG representations, including root-mean-square amplitude (RMS) and cumulative spike train (CST), under two electrode placement strategies: using large electrodes (non-selective) and using muscle-specific electrodes (selective), and under two channel selection strategies: using all channels and using finger-specific channels derived from amplitude-based and anatomy-based selection. Performance was evaluated by correlation coefficient (R) and normalized root-mean-square error (nRMSE).

**
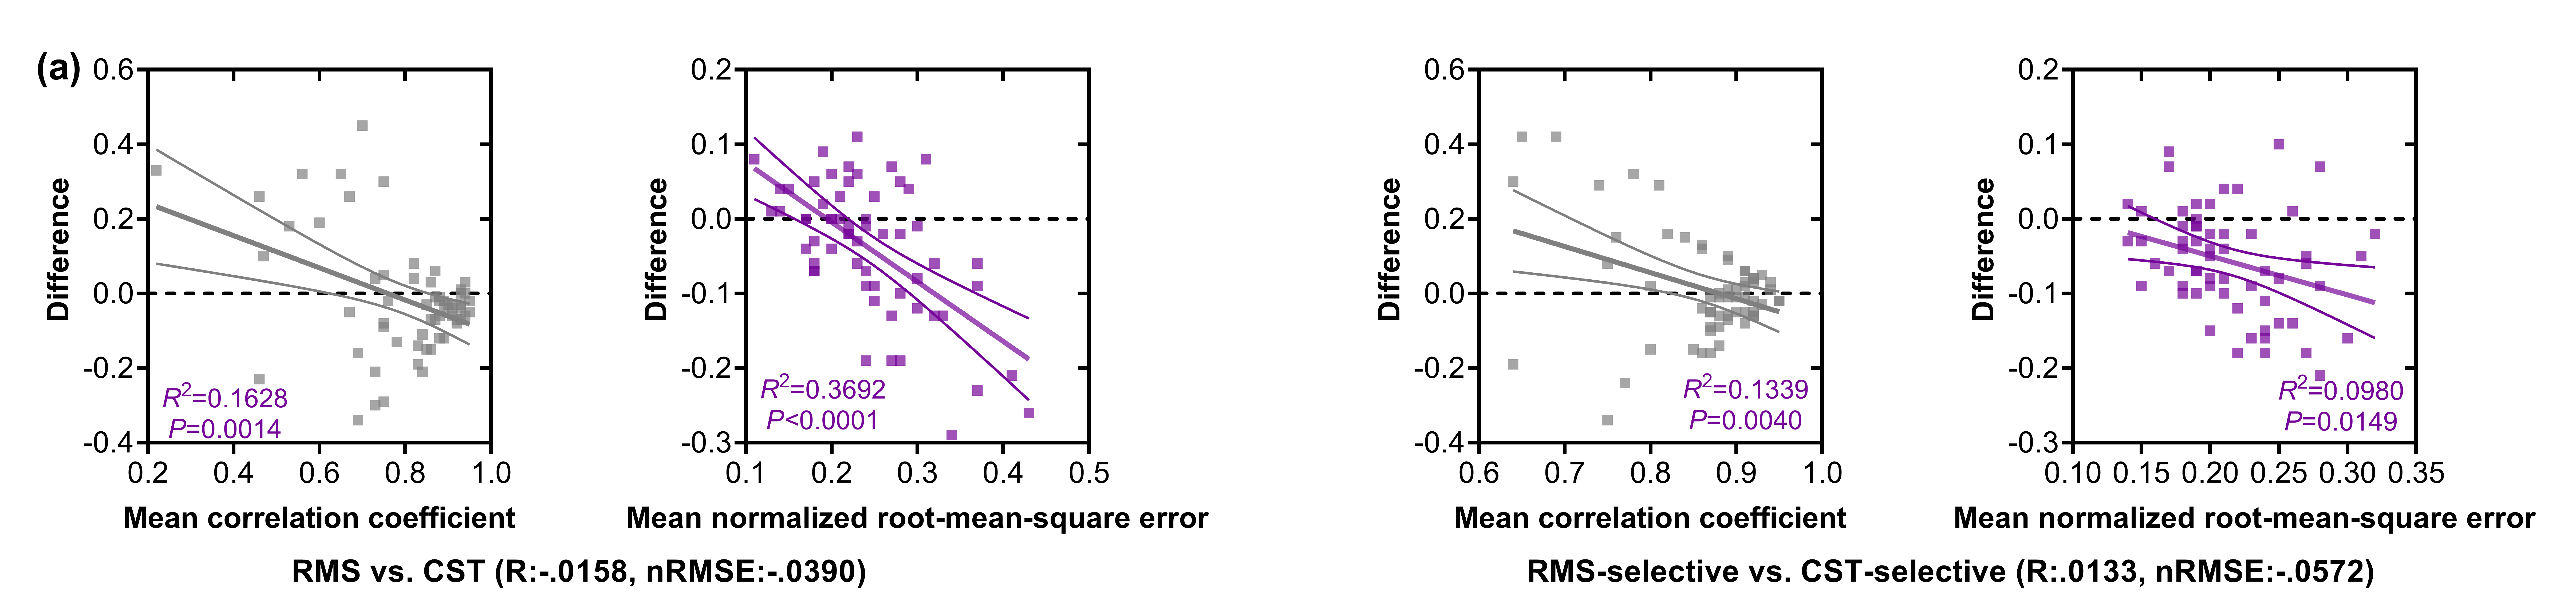
**

**
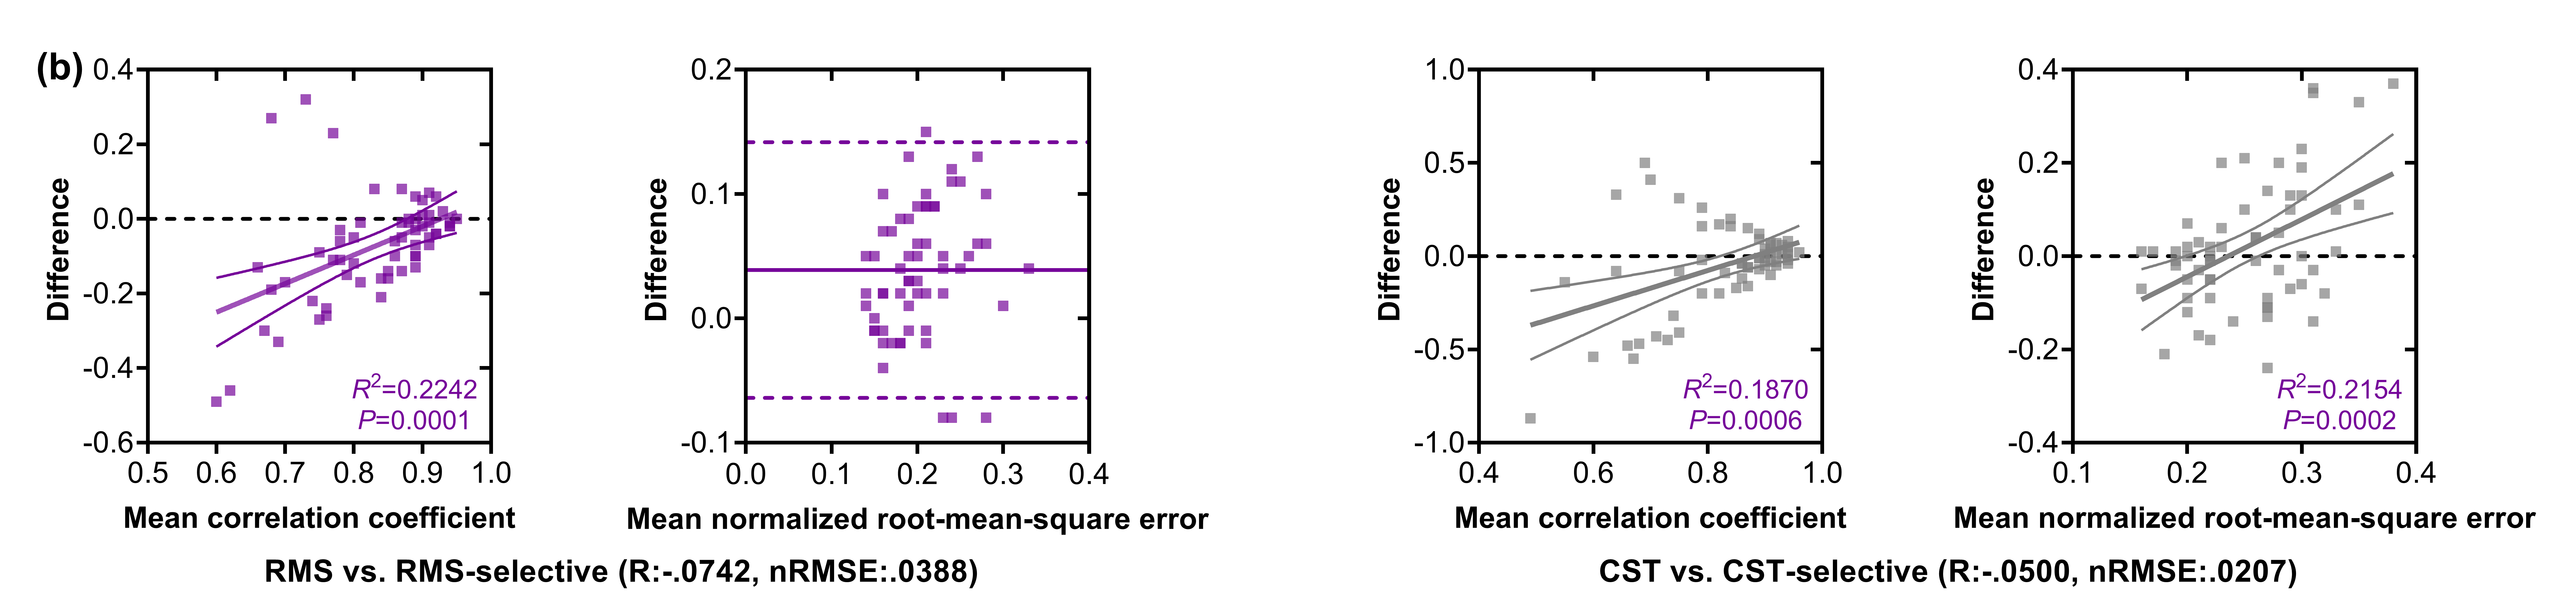

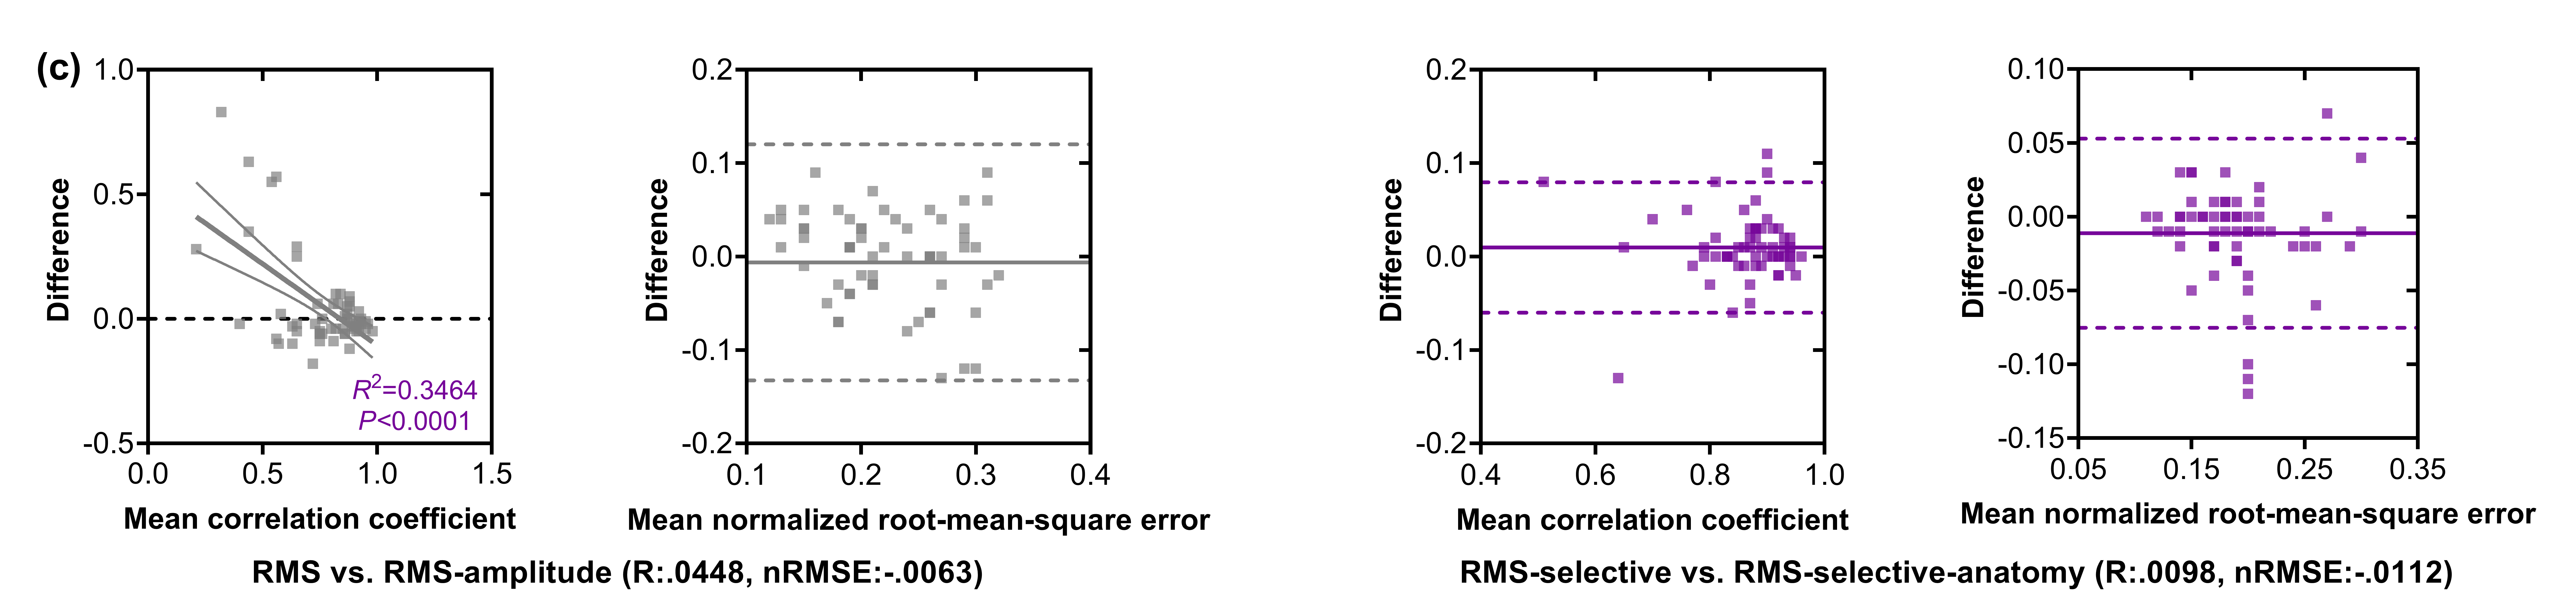
**

**
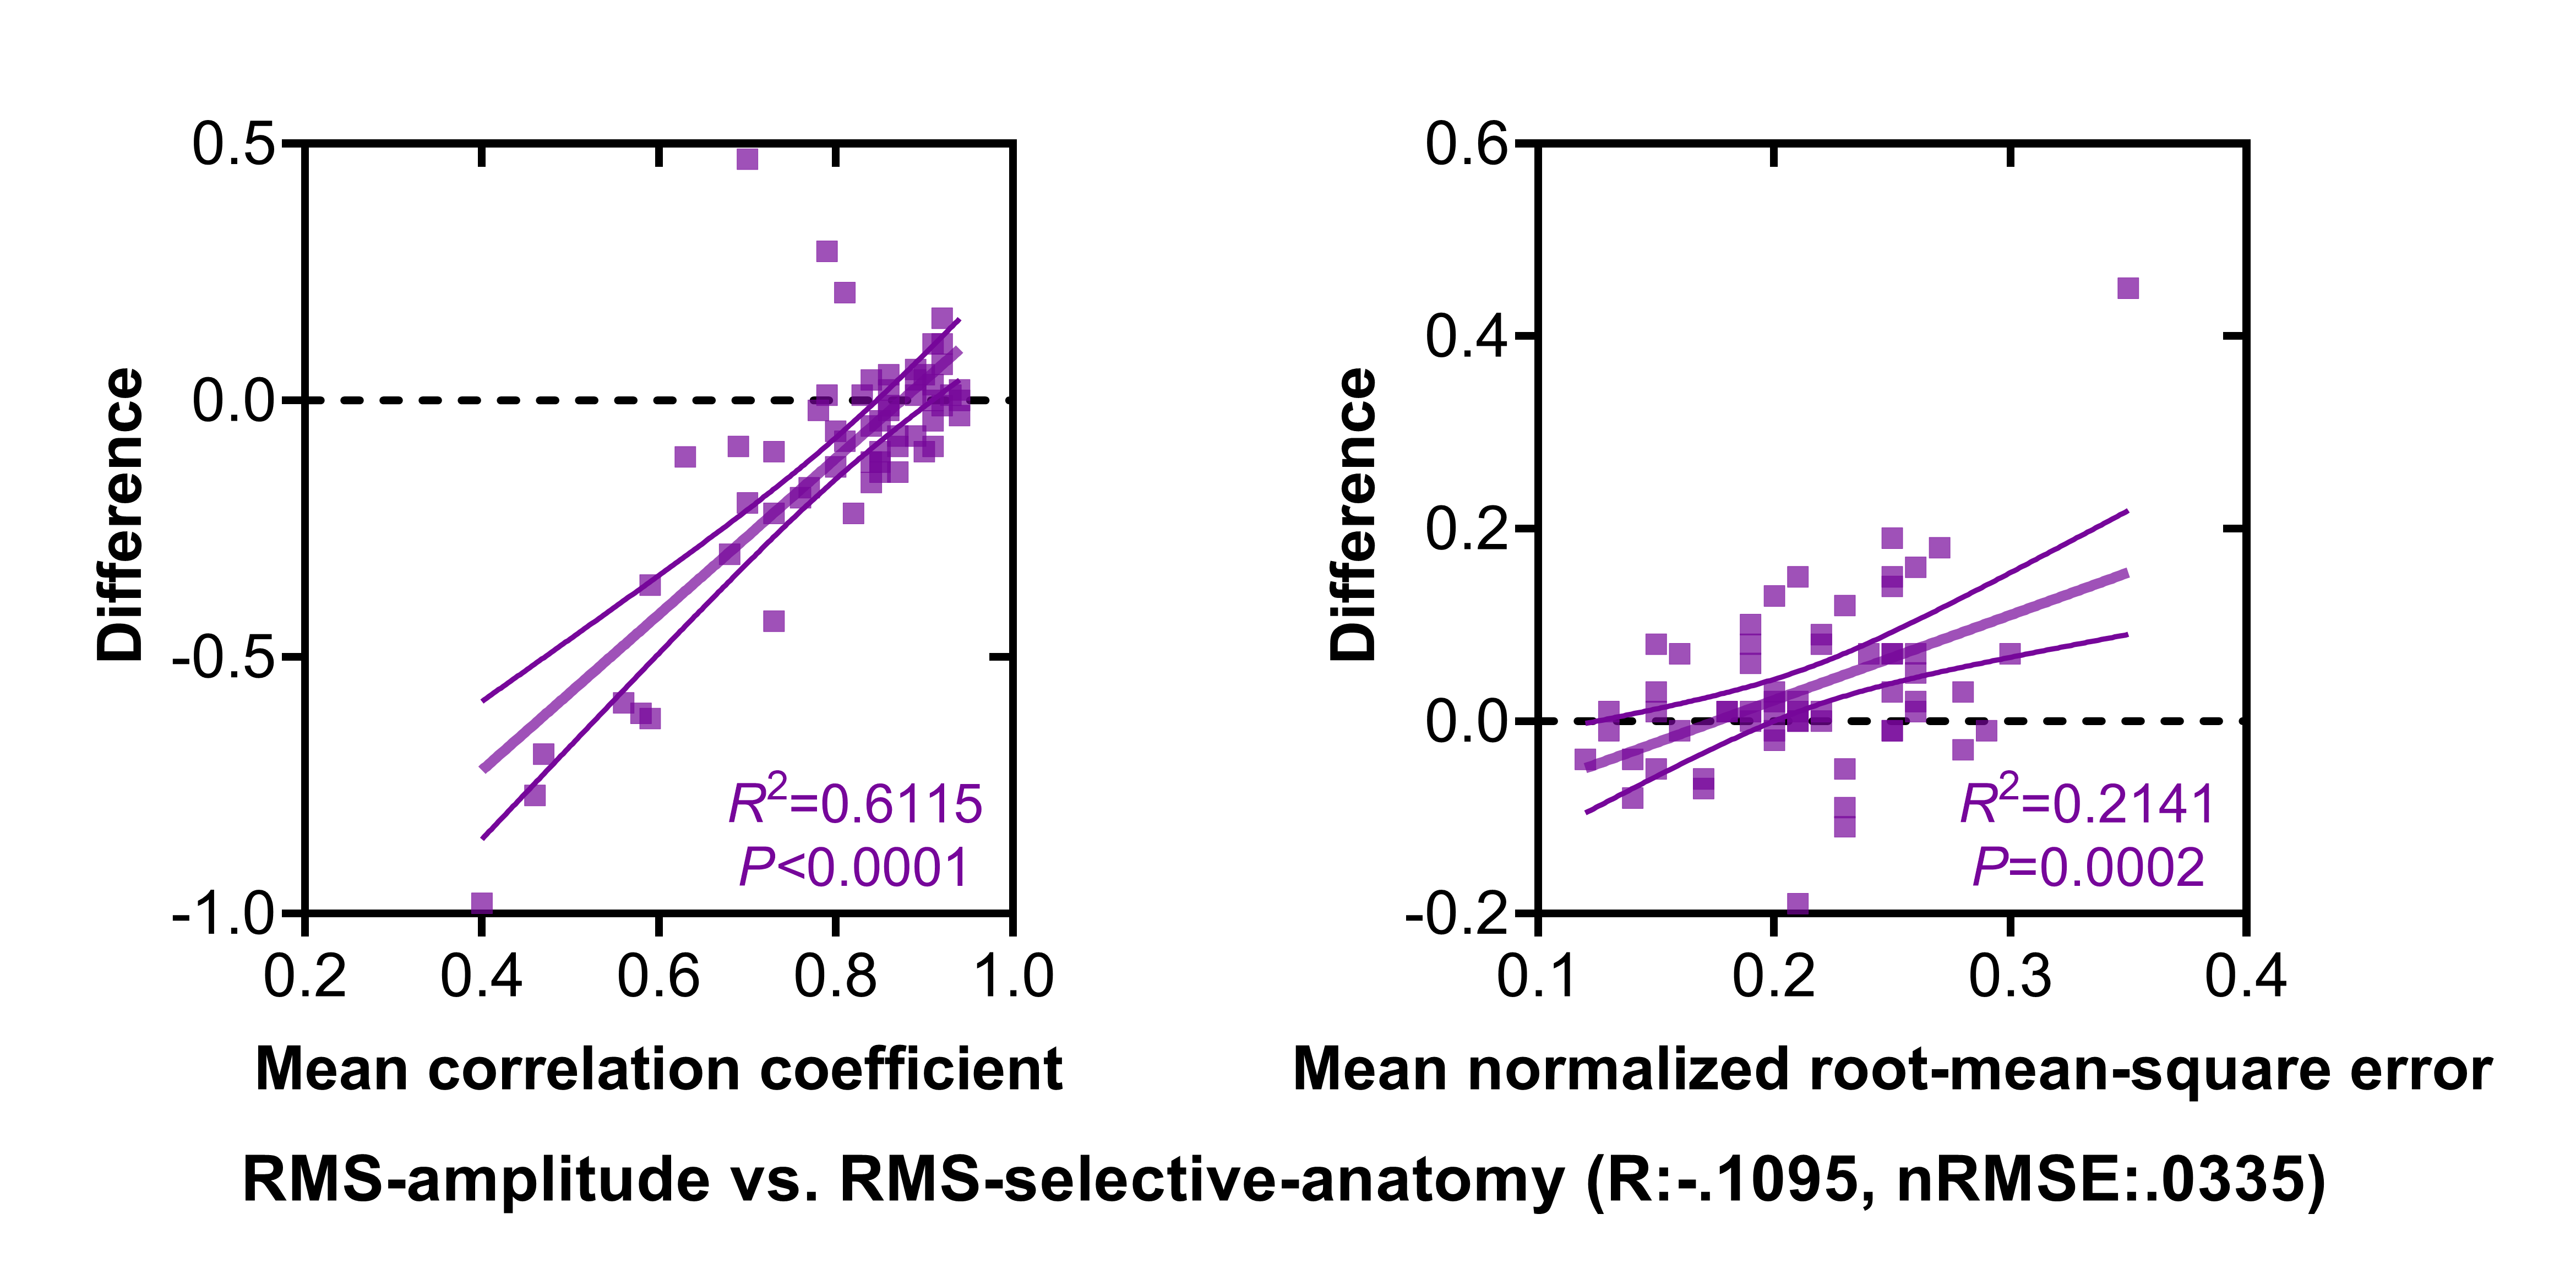
**

**Supplementary Fig. 16, Force estimation performance differences for individual fingers, including the index, middle and ring fingers, across a total of six methods** (illustrated in **Fig. 3** in the main text). Performance differences are detailed by Bland-Altman analysis through the following breakdown: (a) muscle activation vs. neural spiking (for RMS and CST), (b) electrode placement (comparing non-selective and selective configurations), and (c) channel selection (evaluating anatomy-based and amplitude-based methods). 60 samples=3 fingers×2 force levels×10 subjects. Abbreviations: root-mean-square amplitude (RMS), cumulative spike train (CST), correlation coefficient (R), root-mean-square error (nRMSE).

**
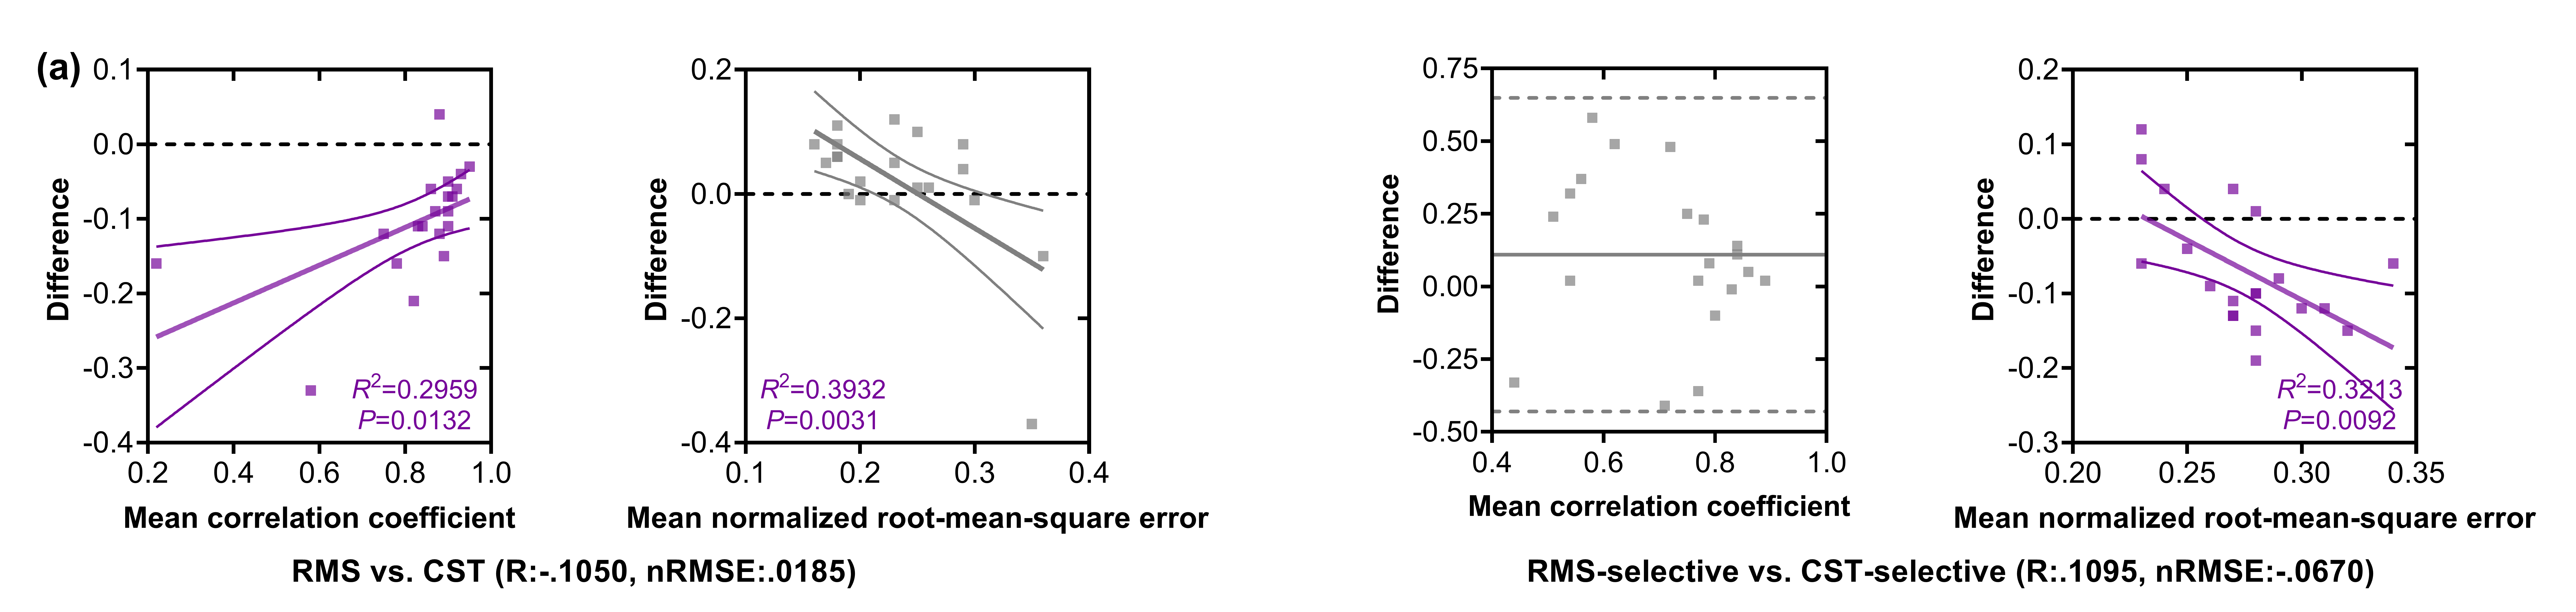

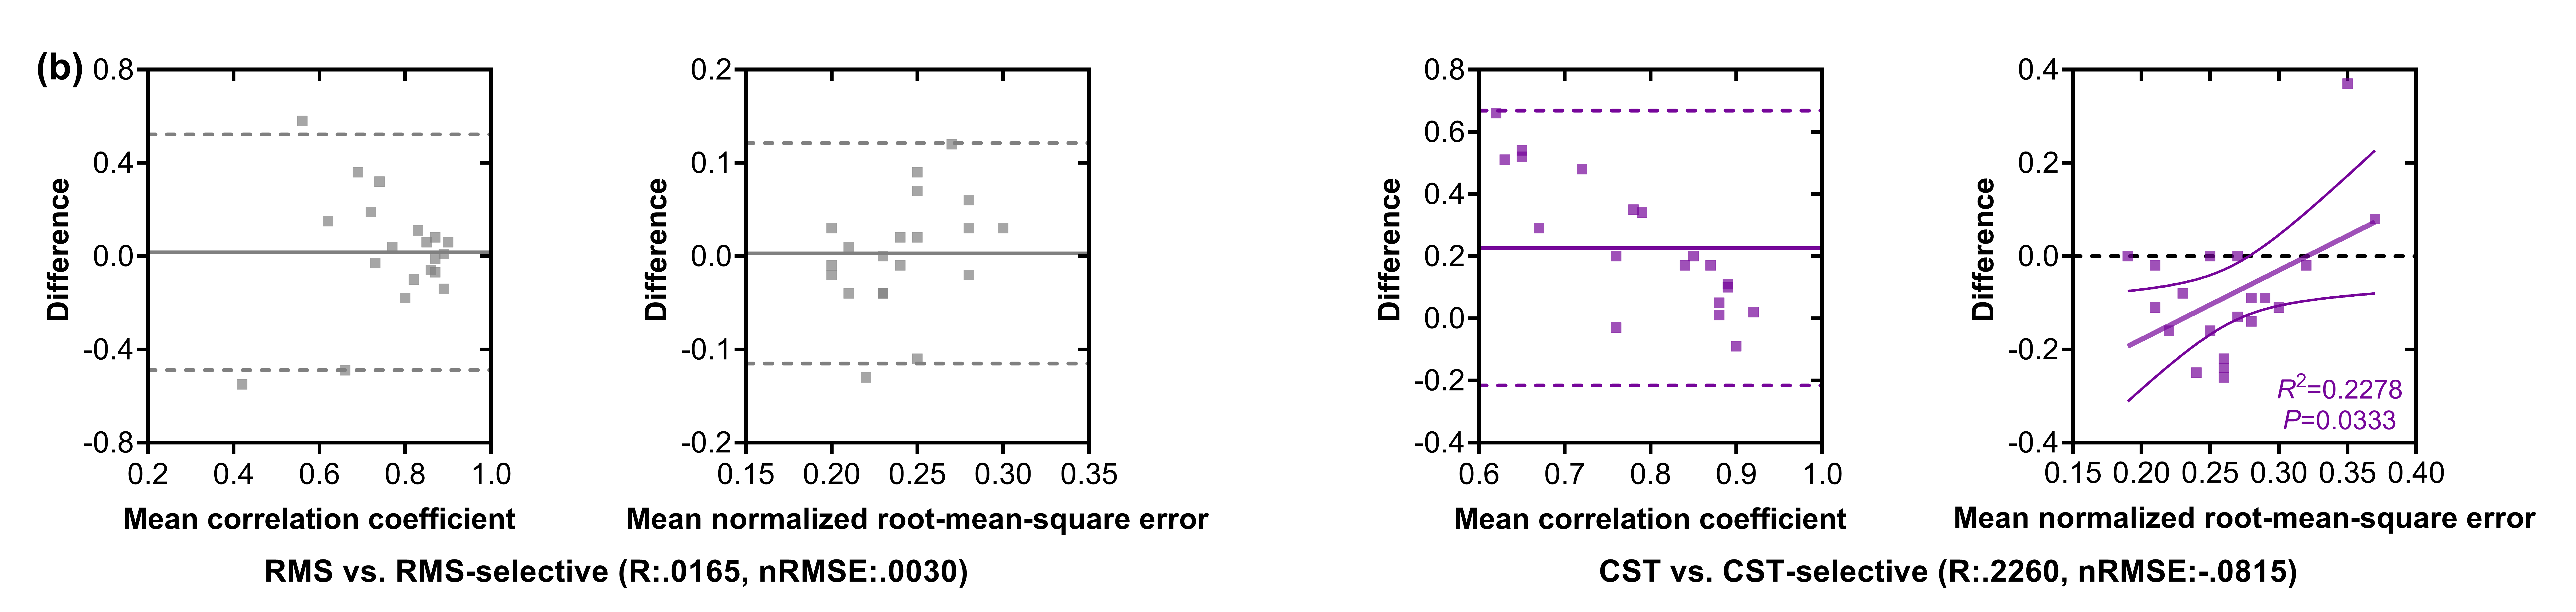

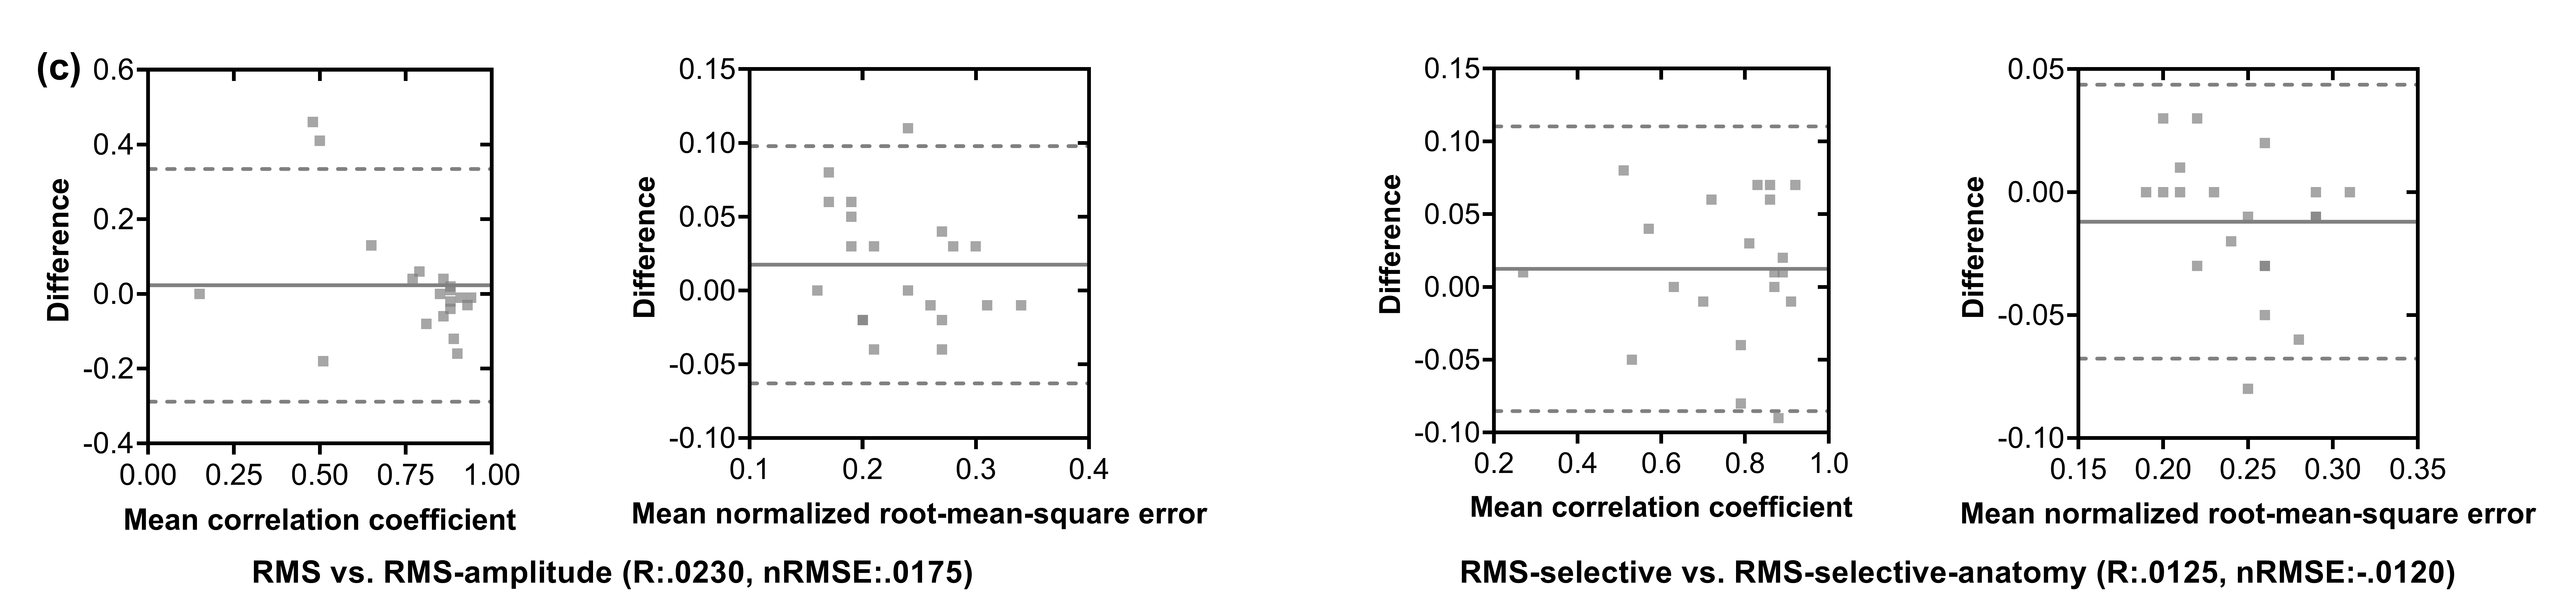

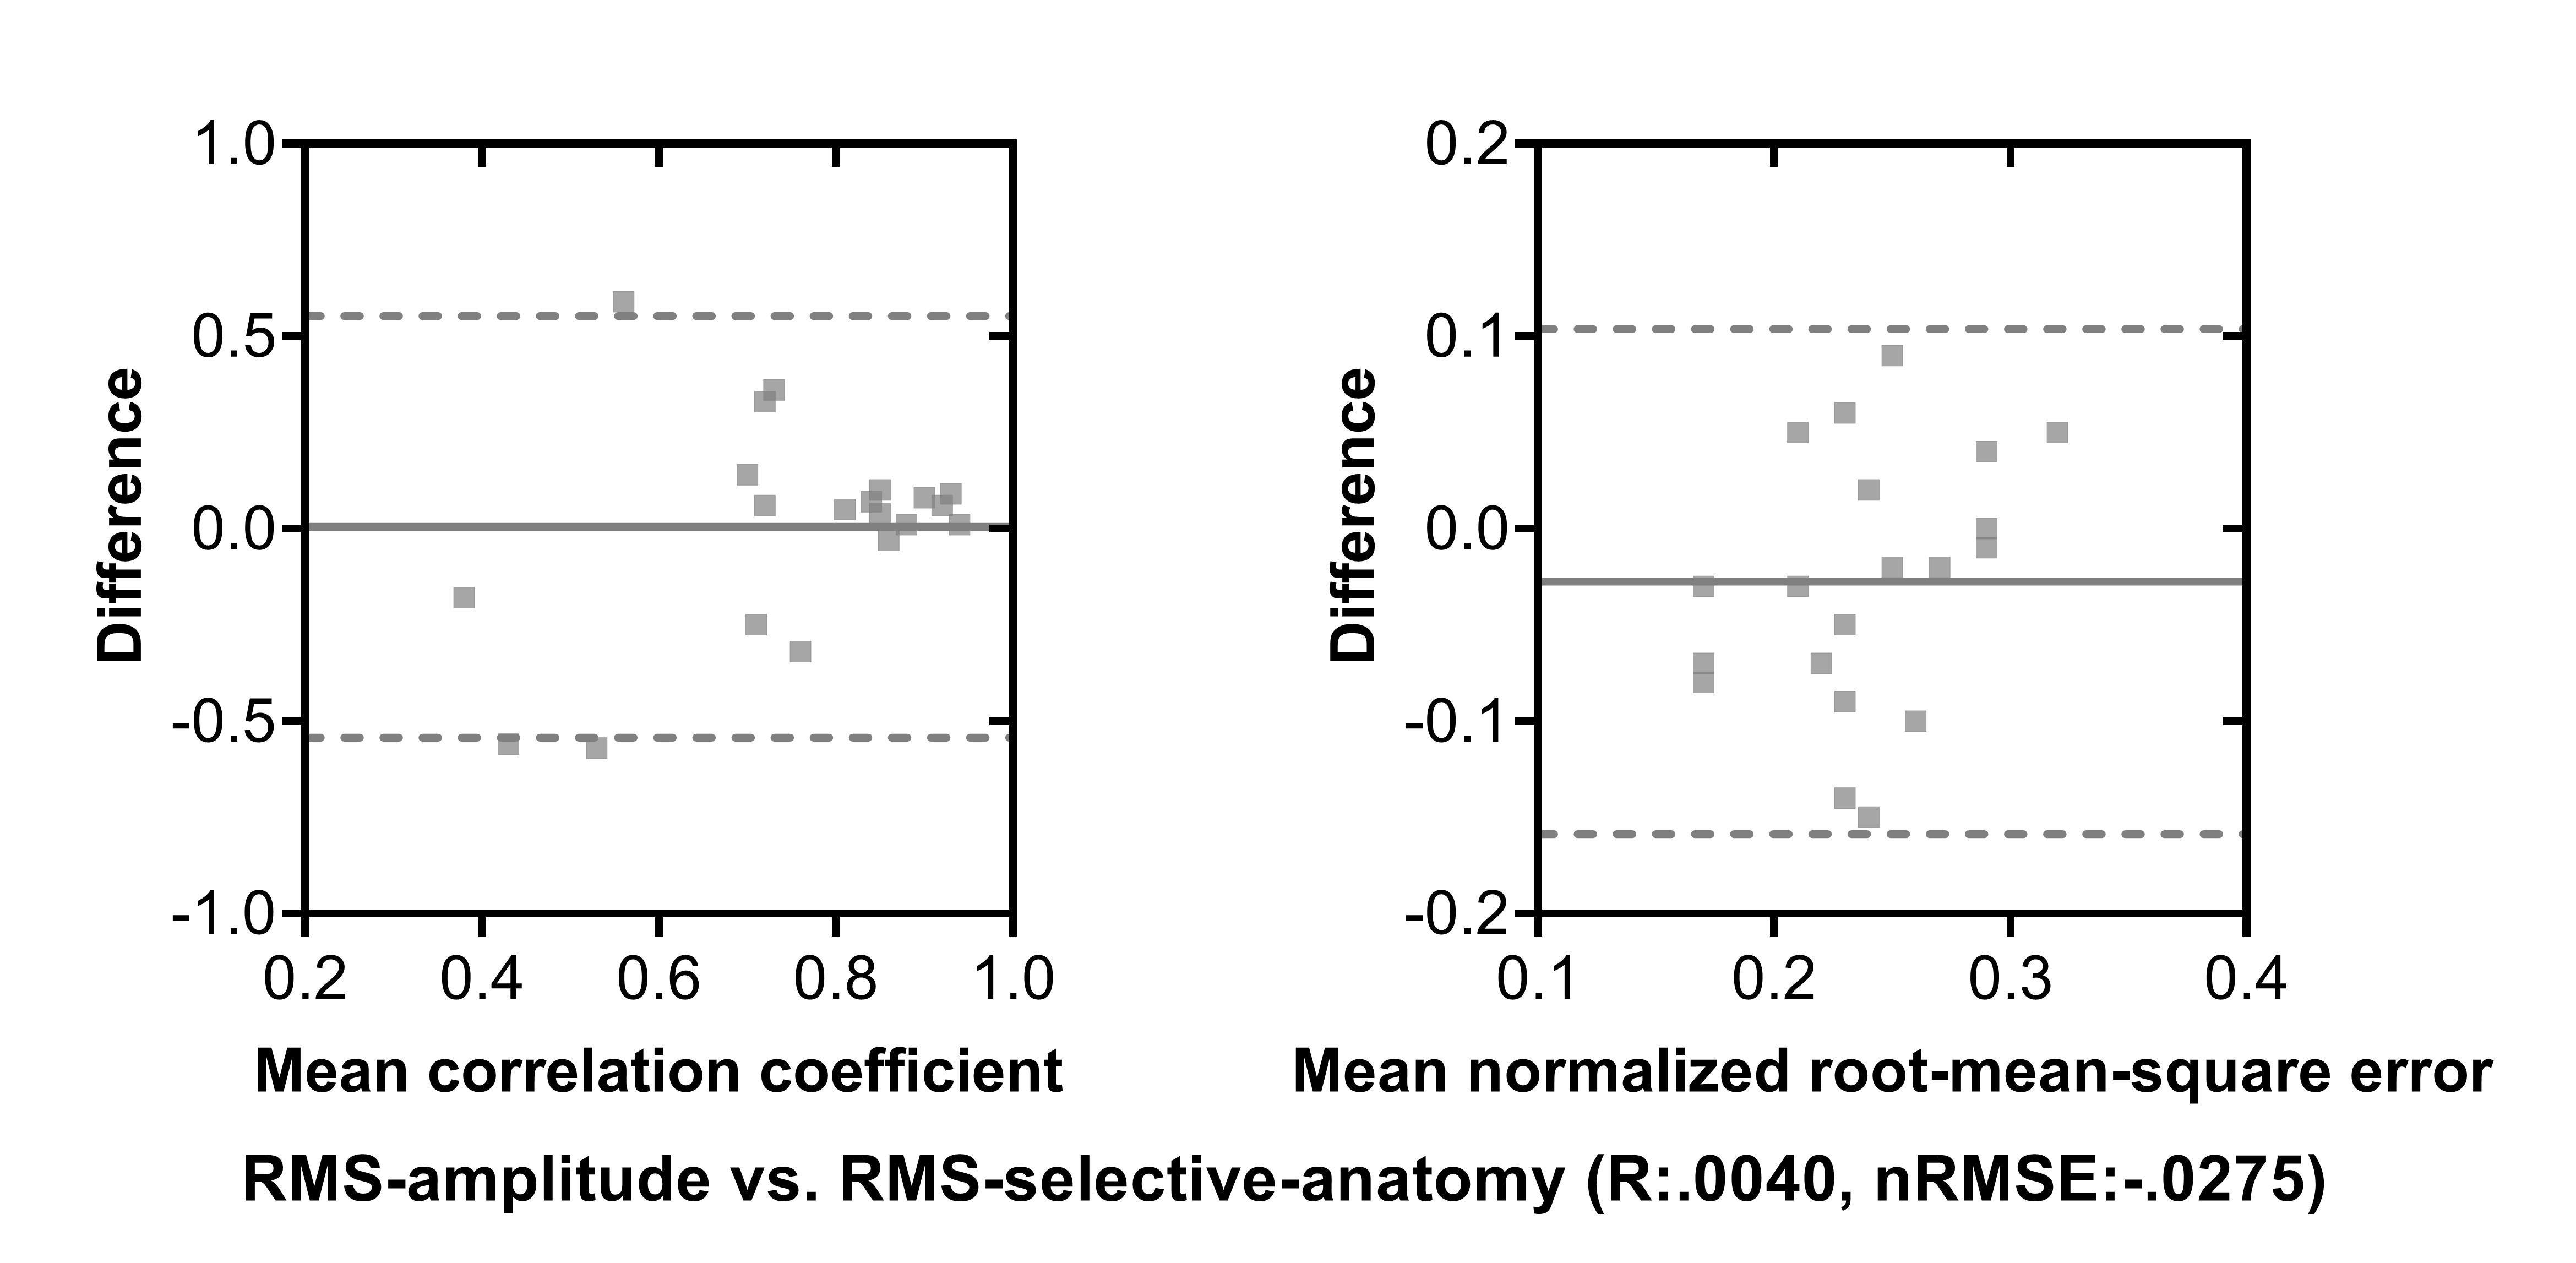
**

**Supplementary Fig. 17, Force estimation performance differences for the little finger, across a total of six methods** (illustrated in **Fig. 3**). in the main text. Performance differences are detailed by Bland-Altman analysis through the following breakdown: (a) muscle activation vs. neural spiking (for RMS and CST), (b) electrode placement (comparing non-selective and selective configurations), and (c) channel selection (evaluating anatomy-based and amplitude-based methods). 20 samples=1 finger×2 force levels×10 subjects. Abbreviations: root-mean-square amplitude (RMS), cumulative spike train (CST), correlation coefficient (R), root-mean-square error (nRMSE).

**Supplementary Note 1, Anatomical overlap reveals performance limits of individual-finger force estimation.**

The electromyography–force relationship is confounded by electrode placement, crosstalk and co-activation1, because digit-related muscles are anatomically crowded2, 3. Prior studies have observed substantial overlap in activation maps during finger movements4, yet this phenomenon has not been quantitatively linked to underlying anatomy. Consequently, finger-level channel selection strategies are difficult to evaluate without anatomical references5, and it remains unclear whether decoding limits reflect algorithmic shortcomings or irreducible source overlap. Although neural-drive approaches may reduce reliance on anatomical knowledge6, their robustness under finger-level channel selection has not been tested.

From the surface projections of compartment boundaries (**Fig. 3c** in the main text), we found that the skin surface lacks any completely non-overlapping region exclusive to a single finger. Instead, surface projections of compartment boundaries showed the overlap between neighboring compartments (index–middle, ring–little) was ~0.8 ± 0.2, whereas the most distant pair (index–little) was ~0.1 ± 0.1. These findings indicate that electromyography sources overlap intrinsically in space, and because electromyography propagates through volume conduction, purely spatial-domain processing of surface signals cannot fundamentally eliminate crosstalk in multi-finger movements.

**Results**

To quantify how these anatomical constraints impact neural-interface decoding performance, we incorporated compartment information into channel optimization for individual-finger flexion force estimation and compared performance across channel configurations and electromyography features (**Supplementary Movie 5**). We used the conventional root mean square (RMS) amplitude feature and the cumulative spike train (CST) feature derived from motor unit discharges7. We evaluated force estimation performance (correlation coefficient (R) and normalized RMS error (nRMSE)) under different electrode placements (circumferential forearm versus FDS-specific selective placement) and different channel selection strategies (all channels, amplitude-based, anatomy-projection-based) (**Supplementary Fig. 15**). Overall, force level had an independent main effect, with higher force levels yielding more accurate estimates. RMS and CST achieved comparable overall performance. For the index, middle and ring fingers, muscle-specific selective electrodes outperformed circumferential non-selective electrodes (R increased by ~0.10 and nRMSE decreased by ~0.05). Further analysis (**Supplementary Fig. 16, 17**) revealed that this gain was driven mainly by the RMS method, whereas CST was insensitive to electrode placement, suggesting greater robustness of neural-drive features under individual-finger paradigms. Moreover, neither anatomy-based nor amplitude-based finger-specific channel selection produced significant improvements over using all channels, indicating that fine-grained spatial selection at the finger level is unlikely to surpass the performance ceiling imposed by anatomical overlap.

However, the little finger exhibited a markedly different pattern. CST provided stronger force estimation correlation than RMS (R increased by ~0.10), yet selective electrodes significantly degraded CST performance (R decreased by ~0.25 and nRMSE increased by ~0.10). The high performance achieved with non-selective electrodes and discharge information suggests that little-finger force generation may rely more on co-contraction across other compartments or muscle groups, rather than isolated activation of the target compartment alone (**Supplementary Movie 5**). When muscle-specific or finger-specific spatial selection was applied, the estimator lost synergistic information crucial for the little-finger task, leading to performance deterioration. This little-finger specificity may relate to its architecture. As described in “Anatomical validation of the muscle compartments” in the main text, fibers in the little-finger compartment are shorter and more obliquely oriented (**Fig. 3b** in the main text, Little), and its lower force-generating capacity (see “Muscle architecture and finger-specific functional roles” in the main text) may limit independent output and increase reliance on synergistic co-contraction.

**Discussion**

By quantifying inter-compartment anatomical overlap, we explain the performance limits in individual-finger myoelectric force estimation. Compartment projections showed pronounced spatial mixing: overlap was highest between the index and middle compartments and between the ring and little compartments, whereas the most anatomically distant pair (index and little) had the lowest overlap. Previous work attributed the pronounced overlap of electromyography activation maps1, 8, 9 to volume conductor effects without explicit anatomical grounding. Here we provide an anatomical explanation: crosstalk arises not only from volume conduction, but also from true anatomical overlap, meaning that purely surface-based spatial signal processing cannot fundamentally remove multi-finger crosstalk.

In the evaluation of channel optimization, for the index, middle and ring fingers, muscle-specific selective electrodes outperformed non-selective electrodes by excluding noise from other muscles, but finger-specific channel selection based on anatomy or amplitude did not significantly improve performance relative to using all channels. This null effect is consistent with extensive architectural overlap across compartments. Once the signal is confined to the target muscle, additional finger-specific channel selection cannot overcome intrinsic overlap among source compartments. Muscle-specific electrode placement improved RMS but had no significant effect on CST, indicating that CST features rely less on precise spatial sampling. This may be because neural drive intrinsically encodes force-related information and can, to some extent, resist information mixing induced by spatial overlap.

The little finger provided a distinct counterexample. CST substantially outperformed RMS, yet selective electrodes degraded CST performance. The most likely explanation is that little-finger force generation depends on co-contraction of synergistic muscles. When spatial channel selection is applied, force-related neural discharge information is lost. The need for co-contraction in little-finger tasks is also consistent with architectural properties, because both FL and PCSA of the little compartment were the lowest among the four fingers, giving it the weakest intrinsic force–displacement capacity.

In summary, extensive anatomical overlap among FDS compartments constitutes a performance ceiling for individual-finger force estimation, and finger-specific spatial channel selection cannot overcome this limitation. For index, middle and ring force estimation, muscle-specific selective electrode placement improves the accuracy of the baseline RMS approach, supporting its practical value as an electrode placement strategy. In contrast, for tasks that depend strongly on synergistic co-contraction, such as the little finger, overly aggressive spatial selection can remove decodable information and create an even more stringent decoding bottleneck.

**Methods**

**a) Electromyography acquisition.** We built an electromyography experimental platform that synchronously recorded high-density surface electromyogram and finger forces (**Supplementary Fig. 4, Movie 5**). Individual-finger flexion force was measured using an electrical force transducer for dynamic measurement (Quattrocento, OT Bioelettronica, Turin, Italy). Force signals were amplified and conditioned, then acquired via a 16-bit data acquisition card at a sampling rate of 100 Hz. Electromyogram and force were sampled at 100 Hz in the force estimation experiment. To ensure temporal alignment between electromyography and force, a synchronization trigger simultaneously sent pulses to both systems, ensuring a time delay < 1 ms.

The target finger was connected to the force transducer in the force estimation experiment. Other fingers were not restrained, and participants were instructed to minimized involuntary contraction. Participants performed dynamic individual-finger flexion for 10 s by tracking a trapezoidal force trajectory under visual feedback: a 2.5 s ramp-up (0% to 25% or 50% MVC), a 5 s hold (25% or 50% MVC), and a 2.5 s ramp-down (25% or 50% MVC to 0%) in force estimation experiment.

**b) Signal processing and electromyography features.** For force estimation, we extracted two classes of electromyography features, including the conventional RMS amplitude feature and the CST feature driven by motor unit discharges. CST serves as a more direct estimate of neural drive, whereas RMS provides an engineering baseline.

RMS envelopes were computed for each channel using a 200 ms sliding window with a 50 ms step, capturing electrical activity intensity while balancing temporal resolution and stability. Channel RMS values were normalized to 0–1, and RMS was averaged across three repeated trials under the same condition. This average RMS was used to construct activation maps.

We estimated CST using a spatial spike detection approach7, which effectively extracts neural drive information. The method comprised two stages: (1) signal enhancement. Raw high-density surface electromyography was decorrelated via zero-phase component analysis whitening, and energy was computed in the Mahalanobis space to highlight motor unit action potentials, and (2) spatiotemporal spike detection. A spatiotemporal sliding window scanned the energy signal, and a peak was classified as a discharge if it exceeded an adaptive background-noise threshold and was a local maximum within the spatial neighborhood and within a 5 ms temporal window.

: the detection threshold for the channel, : the median energy value of this channel in the resting state, 0.6745: the normalization coefficient for converting the median to the standard deviation estimate, and : the adjustable sensitivity parameter (= 4 in this study). The resulting binary spike trains were smoothed with a 0.25 s sliding window to obtain an instantaneous discharge rate.

**c) Force estimation experiment.** Force was estimated by linearly regressing mean RMS to force7. For CST features, the summed instantaneous discharge rates of the motor unit pool were mapped linearly to estimate force7. Performance metrics included the correlation coefficient (R) and the normalized RMS error (nRMSE). R quantified goodness of fit of the force trajectory, whereas nRMSE quantified deviation between estimated and recorded forces.

where and denote the recorded and estimated forces, respectively, and is the number of samples.

Based on different spatial channel-selection strategies, we designed multiple channel configurations to evaluate the effect of channel optimization on force estimation performance (**Supplementary Fig. 15**). Channel selection aimed to physically isolate crosstalk from non-target signals as much as possible. The strategies were: (1) electrode placement—muscle-specific selective electrodes (suffix -selective, two flexible grids, 13 × 5, diameter 1 mm, spacing 8 mm) versus circumferential forearm non-selective electrodes (three flexible grids, 8 × 8, diameter 1 mm, spacing 10 mm); (2) electromyography features—RMS and CST; and (3) finger-specific channel selection—amplitude-based (suffix -amplitude, channels with RMS > 0.8) and anatomy-based (suffix -anatomy, channels within the projected boundary of the target compartment). Accordingly, four RMS-based methods were evaluated, including RMS, RMS-amplitude, RMS-selective, RMS-selective-anatomy. Two CST-based methods were evaluated, including CST and CST-selective. CST-amplitude did not exist due to the independence of CST from RMS amplitude. CST-selective-anatomy was not tested, because further anatomy-based selection markedly reduced force estimation performance.

**d) Statistical analysis.** Force estimation performance (R and nRMSE) was compared within each finger using two-factor repeated-measures analysis of variance (ANOVA, **Supplementary Fig. 15**) with two within-subject factors: force level (25% and 50% MVC) and estimation method (see “a) Electromyography acquisition” in this section). Estimation methods were contrasted along three dimensions: (1) electrode selection—muscle-specific versus circumferential forearm electrodes; (2) electromyography feature—RMS versus CST; and (3) finger-specific channel selection—all channels versus amplitude-based selection, and all channels versus anatomy-based selection. After ANOVA, Bland–Altman analyses were performed to visualize distributions of performance differences, and paired t-tests were used to test whether the differences deviated significantly from zero. Given the distinctive performance pattern of the little finger (see “Results” in this section), Bland–Altman analyses were performed separately for the little finger and the other three fingers.

**References**

1. Fan J, Hu X. Decomposing Task-Relevant Information From Surface Electromyogram for User-Generic Dexterous Finger Force Decoding. *IEEE J Biomed Health Inf* **28**, 3907-3917 (2024).

2. McIsaac TL, Fuglevand AJ. Motor-unit synchrony within and across compartments of the human flexor digitorum superficialis. *J Neurophysiol* **97**, 550-556 (2007).

3. Campisi ES, Johnston M-L, Kelly EC, Tran J, Switzer-McIntyre S, Agur AMR. Intramuscular aponeuroses and fiber bundle morphology of the five bellies of flexor digitorum superficialis: A three-dimensional modeling study. *J Anat* **242**, 1003-1011 (2023).

4. van Beek N, Stegeman DF, van den Noort JC, Veeger D, Maas H. Activity patterns of extrinsic finger flexors and extensors during movements of instructed and non-instructed fingers. *J Electromyogr Kinesiol* **38**, 187-196 (2018).

5. Farina D, Merletti R, Enoka RM. The extraction of neural strategies from the surface EMG: 2004-2024. *J Appl Physiol* **138**, 121-135 (2025).

6. Roy R, Sprague AH, Shahrooei A, Hu X, Kamper D. Reliability of individual finger force prediction from electromyographic signals recorded from surface arrays: Implications for assistive device use. *J Neural Eng* **23** (2026).

7. Xu Y, Yu Y, Zhao Z, Chen C, Sheng X. Cumulative Spike Train Estimation for Muscle Excitation Assessment From Surface EMG Using Spatial Spike Detection. *IEEE J Biomed Health Inf* **27**, 5335-5344 (2023).

8. Fan J, Hu X. Towards Efficient Neural Decoder for Dexterous Finger Force Predictions. *IEEE Trans Biomed Eng* **71**, 1831-1840 (2024).

9. Gao Z*, et al.* Extensor Digitorum Communis Compartments With a Double Compensation Synergy Strategy for Constant Force Control of the Index Finger. *IEEE Trans Neural Syst Rehabil Eng* **31**, 1451-1461 (2023).

**Supplementary Table 1****, Architectural parameters of flexor digitorum superficialis (FDS) muscle and its compartments from 10 healthy individuals**

| **Muscle or Compartment** | **Muscle Volume and Fraction (mm3, %)** | **Muscle Length (mm)** | **Fiber Length (mm)** | **FL/ML ratio (–)** | **PA (°)** | **PCSA (mm2)** |
| --- | --- | --- | --- | --- | --- | --- |
| FDS (non-segmented) | 46100±14200 | 155±20 | 64±17 | 0.40±0.07 | 6±2 | 750±110 |
| FDS (segmented) | 46100±14200 | 145±19 | 47±13 | 0.31±0.06 | 6±1 | 970±190 |
| Index | 12500±4200, 27±3 | / | 41±13 | / | 5±2 | 310±70 |
| Middle | 16600±4900, 36±3 | / | 54±15 | / | 5±2 | 320±60 |
| Ring | 9600±3400, 21±2 | / | 50±14 | / | 6±1 | 190±40 |
| Little | 7500±2200, 16±1 | / | 39±12 | / | 6±1 | 200±50 |
| Index & Little | 20000±6400, 42±3 | / | / | / | / | / |
| Middle & Ring | 26100±8100, 58±6 | / | / | / | / | / |

Values are reported as mean±standard deviation. (Abbreviations: fiber length (FL), muscle length (ML), pennation angle (PA), physiological cross-sectional area (PCSA).

**Supplementary Methods 1, Region growing**

| **Algorithm 1 (pseudo-code):** Region growing |
| --- |
| **Input:** Region, seed point, direction field, threshold-related fixed parameters,,.  **Output:** Grown region.   1. ; 2. **while**,, **do** 3. ; // mean direction vector of 4. ; // direction vector of 5. ; // angular scaling factor 6. ; // dynamic angular threshold 7. **if**, **then** 8. appendtoas; // 9. **end if** 10. **end while** |

**Supplementary Methods 2, Contour mapping**

| **Algorithm 2 (pseudo-code):** Contour mapping |
| --- |
| **Input:** Point pairs, including sampled pointsandrespectively from two imagesand, original contour points.  **Output:** Mapped contour points.   1. **for** each pointin, **do** 2. ; // nearest point of 3. ; // matched point of 4. appendtoas; // 5. **end for** |

**Supplementary Methods 3, Farthest streamline sampling**

| **Algorithm 3 (pseudo-code):** Farthest streamline sampling |
| --- |
| **Input:** Streamlinesof muscle fibers, sample size.  **Output:** Sampled streamlines.   1. **for** each streamlinein **do** 2. ; //is uniformly resampled topoints 3. **end for** 4. randomly select a streamlineand; 5. ; //sampled streamline set 6. **for** **do** 7. ; //minimum average direct flip distance***** between each streamline and 8. **end for** 9. **for** **do** 10. ; //index of maximum distance 11. appendtoas; 12. **for** **do** 13. **if**, **then** 14. ; //update minimum distance 15. **end if** 16. **end for** 17. **end for** |

*****Calculation of minimum average direct flip (MDF) distance:

For streamline and :

Each element is a 3D coordinate. Then MDF is calculated:

Here, the flipped version of is , and denotes the Euclidean distance.

**Supplementary Movie 1,** **Research roadmap.**

**Supplementary Movie 2,** **Ultrasound experiment for annotation.** The annotation involved outlining the compartment contours on individual muscle cross-sections using ultrasound imaging and movement estimation.

**Supplementary Movie 3, Color-coded FDS muscle compartments rotating around the proximal-distal axis of the forearm.**

**Supplementary Movie 4,** **Electromyography experiment for validation.** Electromyography experiment was performed to validate compartment segmentation. In vivo imaging (used for the segmentation) and electromyography form the confirmation of functional concordance.

**Supplementary Movie 5, Impact of inter-compartment overlaps on** **neural interface decoding.** Compartment anatomy was incorporated into channel optimization for individual-finger myoelectric force estimation.

**Supplementary Data 1, Muscle compartment data of a representative subject, including T2-weighted images, diffusion-weighted images, and fiber tracts from tractography.** Details can be viewed at the following link: <https://doi.org/10.6084/m9.figshare.30027382>.
